# Supplementary material
Source: publisher figshare collection journal article supplement (https://gsapubs.figshare.com/ndownloader/files/22411446)
Supplement: Supplementary file 1 [file 22411446]

***Elliptical T.I.***

***Full T.I.***

***( $v_{45} = 28\%$ )***

**VP**

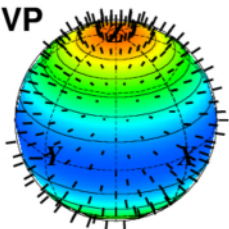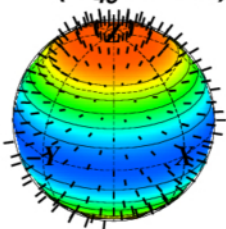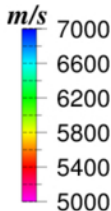

**$\Delta t$**

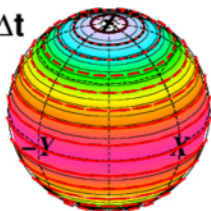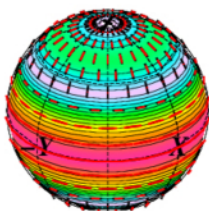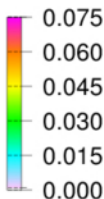

18.7 / 0.0 / 0.0% \*\*

22.2 / 0.0 / 0.0%

***sec per km***

**Cylindrical Fold**

**Limb angle 00°**

**A/L= 0.00**

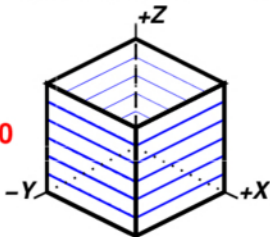

Orocopia Formation schist used as representative fabric.

\*\* Tensor symmetry decomposition percentages:

T.I. / orthorhombic / all lower symmetries.

**Elliptical T.I.**

**Full T.I.**

( $v_{45} = 28\%$ )

**VP**

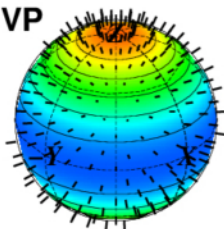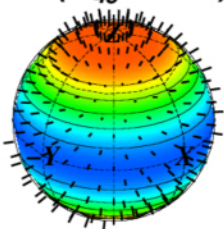

**$\Delta t$**

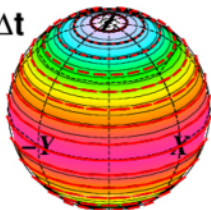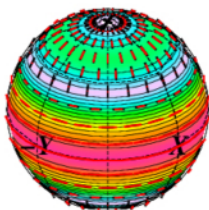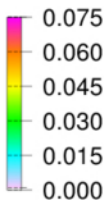

18.7 / 0.0 / 0.0% \*\*

22.2 / 0.0 / 0.0%

*sec per km*

**Cylindrical Fold**

Limb angle  $01^\circ$

**A/L= 0.00**

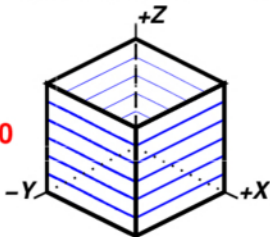

Orocopia Formation schist used as representative fabric.

\*\* Tensor symmetry decomposition percentages:

T.I. / orthorhombic / all lower symmetries.

**Elliptical T.I.**

**Full T.I.**

( $v_{45} = 28\%$ )

**VP**

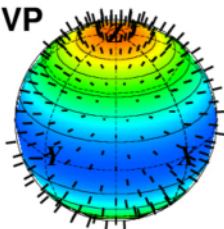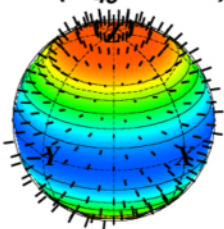

**$\Delta t$**

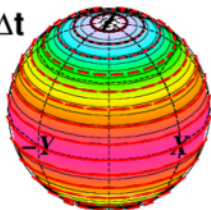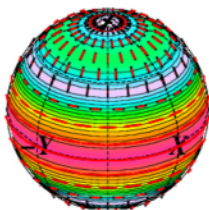

18.7 / 0.0 / 0.0% \*\*

22.2 / 0.0 / 0.0%

*sec per km*

**Cylindrical Fold**

Limb angle  $02^\circ$

**A/L= 0.01**

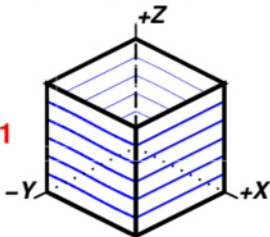

Orocopia Formation schist used as representative fabric.

\*\* Tensor symmetry decomposition percentages:

T.I. / orthorhombic / all lower symmetries.

***Elliptical T.I.***

***Full T.I.***

***( $v_{45} = 28\%$ )***

**VP**

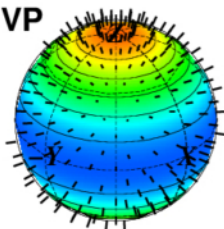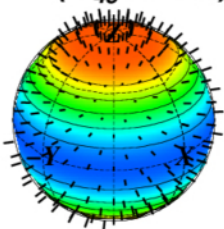

**$\Delta t$**

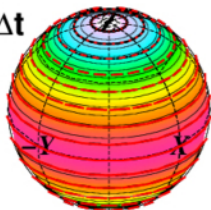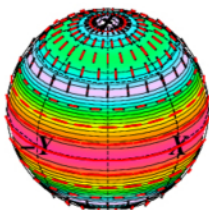

18.6 / 0.0 / 0.0% \*\*

22.1 / 0.0 / 0.0%

***sec per km***

**Cylindrical Fold**

**Limb angle 03°**

**A/L= 0.01**

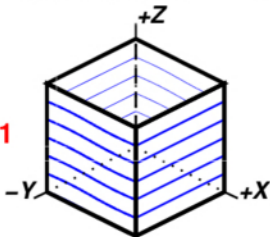

Orocopia Formation schist used as representative fabric.

\*\* Tensor symmetry decomposition percentages:

T.I. / orthorhombic / all lower symmetries.



***Elliptical T.I.***

***Full T.I.***

***( $v_{45} = 28\%$ )***

**VP**

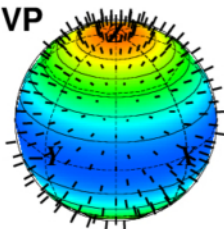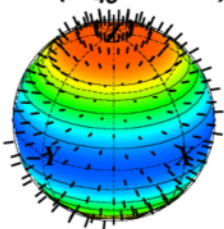

**$\Delta t$**

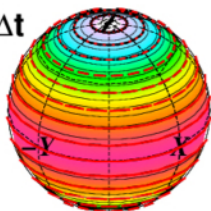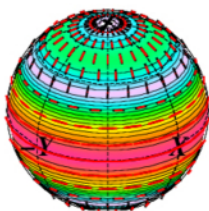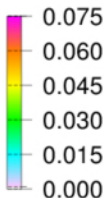

18.6 / 0.0 / 0.0% \*\*

22.0 / 0.1 / 0.0%

***sec per km***

**Cylindrical Fold**

**Limb angle  $04^\circ$**

**$A/L = 0.01$**

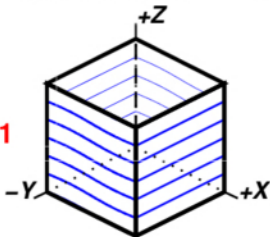

Orocopia Formation schist used as representative fabric.

\*\* Tensor symmetry decomposition percentages:

T.I. / orthorhombic / all lower symmetries.

***Elliptical T.I.***

***Full T.I.***

***( $v_{45} = 28\%$ )***

**VP**

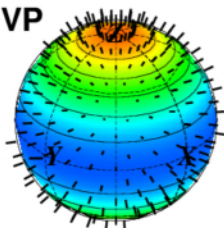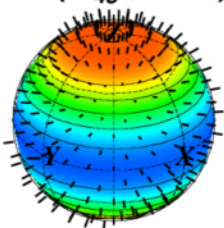

**$\Delta t$**

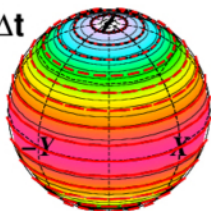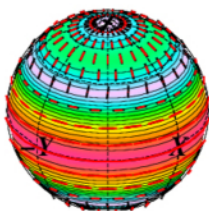

18.5 / 0.0 / 0.0% \*\*

21.9 / 0.1 / 0.0%

***sec per km***

**Cylindrical Fold**

**Limb angle 05°**

***A/L = 0.01***

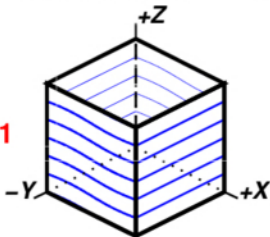

Orocopia Formation schist used as representative fabric.

\*\* Tensor symmetry decomposition percentages:

T.I. / orthorhombic / all lower symmetries.

**Elliptical T.I.**

**Full T.I.**

( $v_{45} = 28\%$ )

**VP**

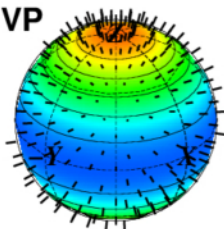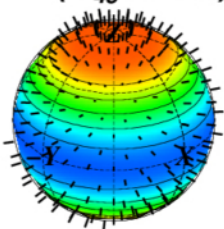

**$\Delta t$**

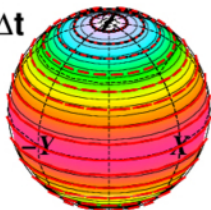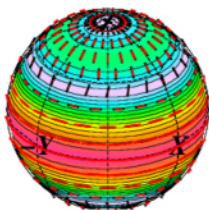

18.4 / 0.1 / 0.0% \*\*

21.8 / 0.2 / 0.0%

*sec per km*

**Cylindrical Fold**

Limb angle  $06^\circ$

**A/L = 0.02**

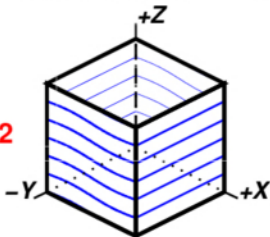

Orocopia Formation schist used as representative fabric.

\*\* Tensor symmetry decomposition percentages:

T.I. / orthorhombic / all lower symmetries.

***Elliptical T.I.***

***Full T.I.***

***( $v_{45} = 28\%$ )***

**VP**

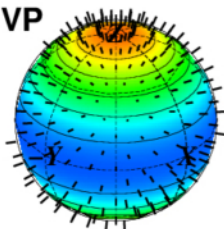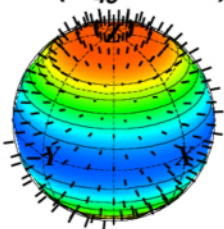

**$\Delta t$**

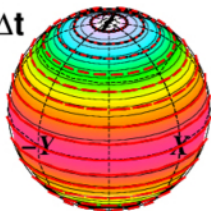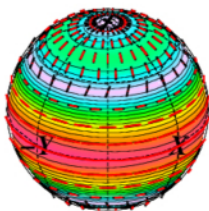

18.4 / 0.1 / 0.0 % \*\*

21.6 / 0.2 / 0.1 %

***sec per km***

**Cylindrical Fold**

**Limb angle  $07^\circ$**

**$A/L = 0.02$**

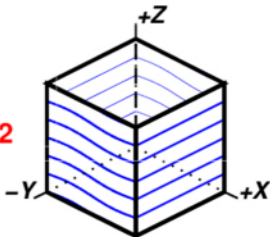

Orocopia Formation schist used as representative fabric.

\*\* Tensor symmetry decomposition percentages:

T.I. / orthorhombic / all lower symmetries.

**Elliptical T.I.**

**Full T.I.**

( $v_{45} = 28\%$ )

**VP**

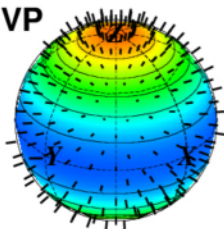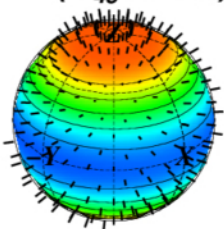

**$\Delta t$**

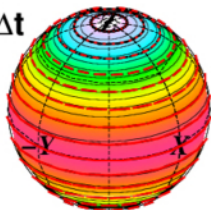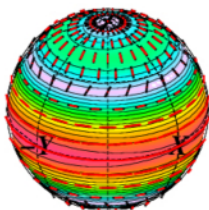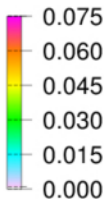

18.3 / 0.1 / 0.0 % \*\*

21.5 / 0.3 / 0.1 %

**sec per km**

**Cylindrical Fold**

**Limb angle  $08^\circ$**

**$A/L = 0.02$**

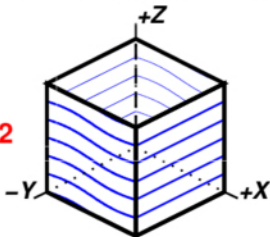

Orocopia Formation schist used as representative fabric.

\*\* Tensor symmetry decomposition percentages:

T.I. / orthorhombic / all lower symmetries.

**Elliptical T.I.**

**Full T.I.**

( $v_{45} = 28\%$ )

**VP**

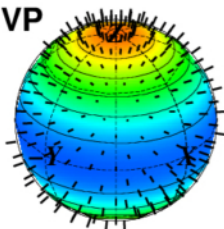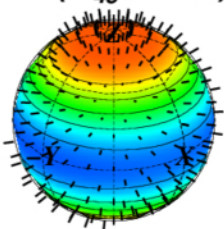

**$\Delta t$**

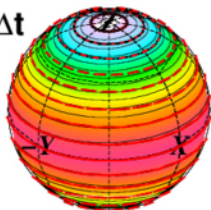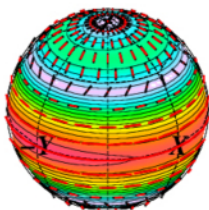

18.1 / 0.2 / 0.0 % \*\*

21.2 / 0.4 / 0.1 %

*sec per km*

**Cylindrical Fold**

Limb angle  $09^\circ$

**A/L = 0.03**

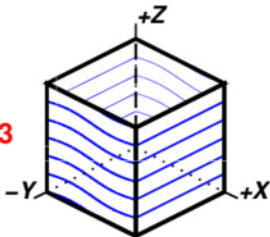

Orocopia Formation schist used as representative fabric.

\*\* Tensor symmetry decomposition percentages:

T.I. / orthorhombic / all lower symmetries.

***Elliptical T.I.***

***Full T.I.***

***( $v_{45} = 28\%$ )***

**VP**

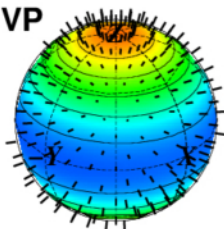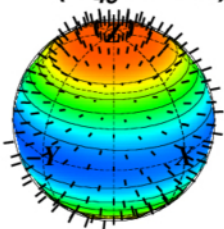

**$\Delta t$**

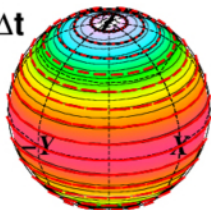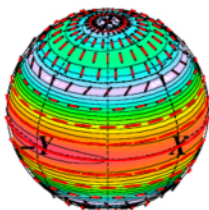

18.0 / 0.2 / 0.0 % \*\*

21.0 / 0.5 / 0.1 %

***sec per km***

**Cylindrical Fold**

**Limb angle  $10^\circ$**

**$A/L = 0.03$**

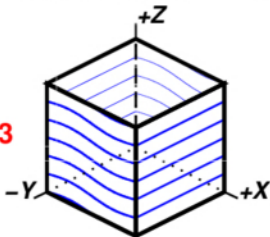

Orocopia Formation schist used as representative fabric.

\*\* Tensor symmetry decomposition percentages:

T.I. / orthorhombic / all lower symmetries.

**Elliptical T.I.**

**Full T.I.**

( $v_{45} = 28\%$ )

**VP**

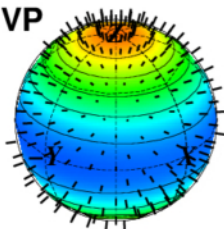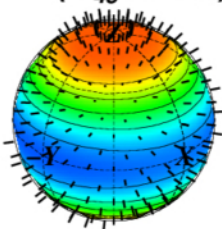

**$\Delta t$**

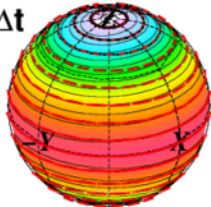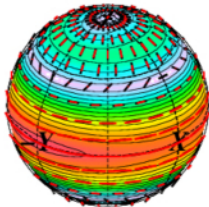

17.9 / 0.3 / 0.1 % \*\*

20.8 / 0.6 / 0.1 %

*sec per km*

**Cylindrical Fold**

Limb angle  $11^\circ$

**A/L = 0.03**

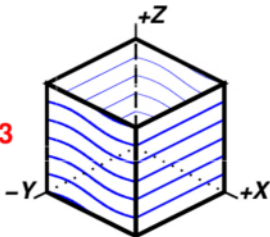

Orocopia Formation schist used as representative fabric.

\*\* Tensor symmetry decomposition percentages:

T.I. / orthorhombic / all lower symmetries.



**Elliptical T.I.**

**Full T.I.**

( $v_{45} = 28\%$ )

**VP**

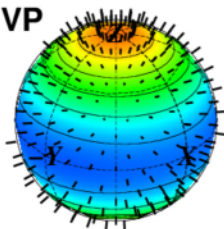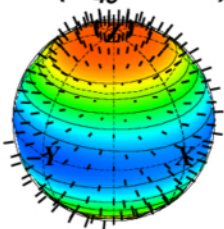

**$\Delta t$**

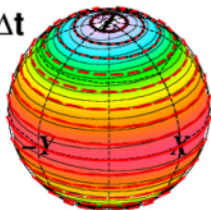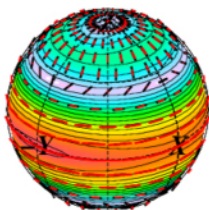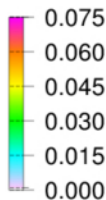

17.7 / 0.3 / 0.1 % \*\*

20.5 / 0.7 / 0.1 %

sec per km

**Cylindrical Fold**

Limb angle  $12^\circ$

**A/L = 0.03**

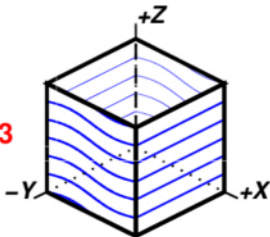

Orocopia Formation schist used as representative fabric.

\*\* Tensor symmetry decomposition percentages:

T.I. / orthorhombic / all lower symmetries.

**Elliptical T.I.**

**Full T.I.**

( $v_{45} = 28\%$ )

**VP**

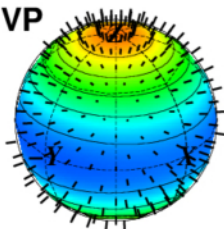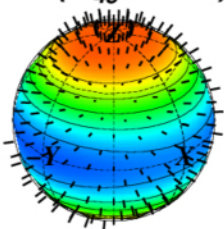

**$\Delta t$**

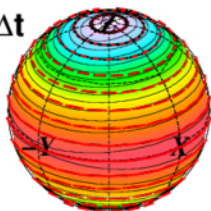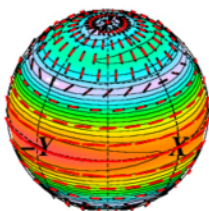

17.5 / 0.4 / 0.1 % \*\*

20.2 / 0.8 / 0.1 %

*sec per km*

**Cylindrical Fold**

Limb angle  $13^\circ$

**$A/L = 0.04$**

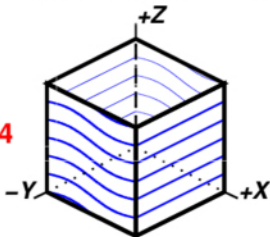

Orocopia Formation schist used as representative fabric.

\*\* Tensor symmetry decomposition percentages:

T.I. / orthorhombic / all lower symmetries.

**Elliptical T.I.**

**Full T.I.**

( $v_{45} = 28\%$ )

**VP**

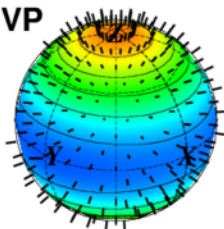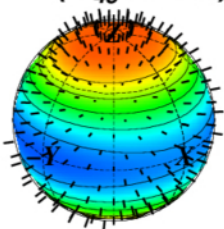

**$\Delta t$**

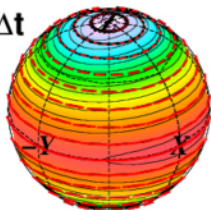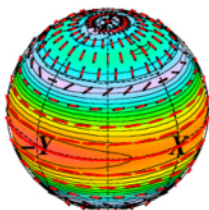

17.4 / 0.4 / 0.1 % \*\*

19.9 / 1.0 / 0.1 %

sec per km

**Cylindrical Fold**

Limb angle  $14^\circ$

**$A/L = 0.04$**

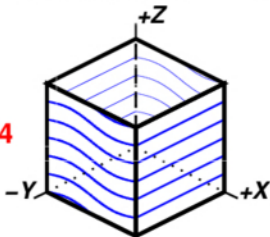

Orocopia Formation schist used as representative fabric.

\*\* Tensor symmetry decomposition percentages:

T.I. / orthorhombic / all lower symmetries.

**Elliptical T.I.**

**Full T.I.**

( $v_{45} = 28\%$ )

**VP**

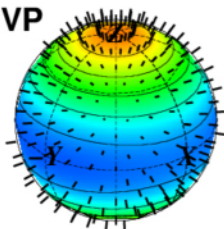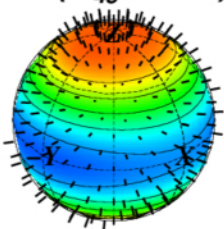

**$\Delta t$**

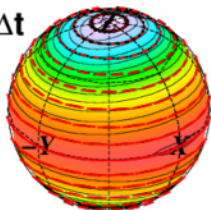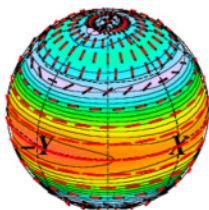

17.2 / 0.5 / 0.1 % \*\*

19.6 / 1.1 / 0.1 %

sec per km

**Cylindrical Fold**

Limb angle  $15^\circ$

**$A/L = 0.04$**

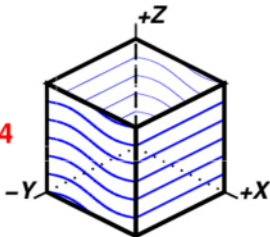

Orocopia Formation schist used as representative fabric.

\*\* Tensor symmetry decomposition percentages:

T.I. / orthorhombic / all lower symmetries.

***Elliptical T.I.***

***Full T.I.***

***( $v_{45} = 28\%$ )***

**VP**

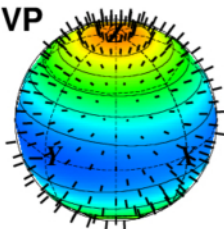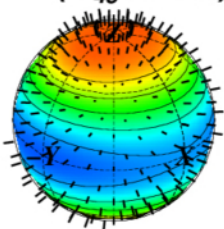

**$\Delta t$**

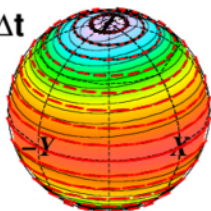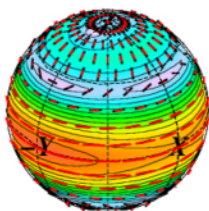

17.0 / 0.6 / 0.1 % \*\*

19.3 / 1.2 / 0.1 %

***sec per km***

**Cylindrical Fold**

**Limb angle  $16^\circ$**

**$A/L = 0.05$**

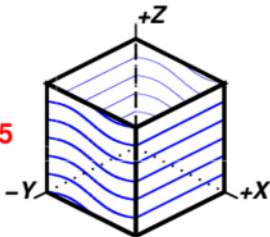

Orocopia Formation schist used as representative fabric.

\*\* Tensor symmetry decomposition percentages:

T.I. / orthorhombic / all lower symmetries.

***Elliptical T.I.***

***Full T.I.***

***( $v_{45} = 28\%$ )***

**VP**

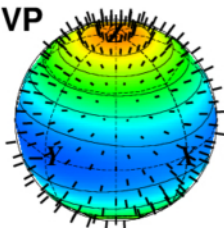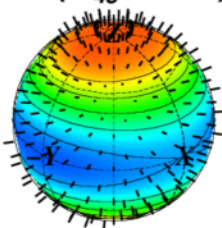

**$\Delta t$**

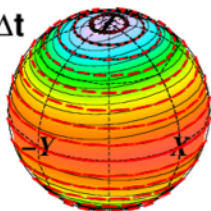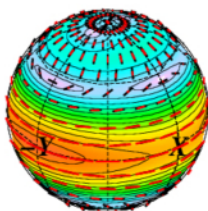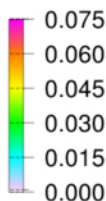

16.8 / 0.6 / 0.1 % \*\*

18.9 / 1.4 / 0.1 %

***sec per km***

**Cylindrical Fold**

**Limb angle  $17^\circ$**

**$A/L = 0.05$**

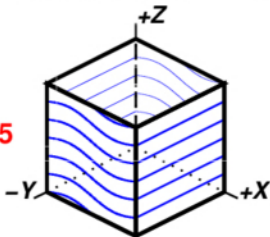

Orocopia Formation schist used as representative fabric.

\*\* Tensor symmetry decomposition percentages:

T.I. / orthorhombic / all lower symmetries.

**Elliptical T.I.**

**Full T.I.**

( $v_{45} = 28\%$ )

**VP**

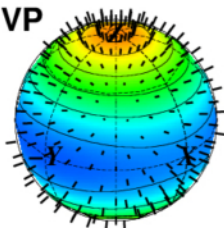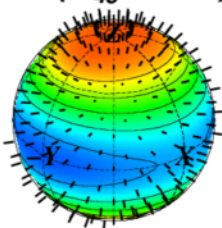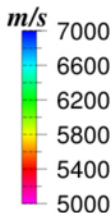

**$\Delta t$**

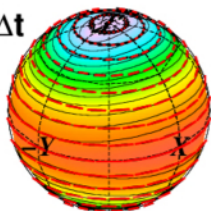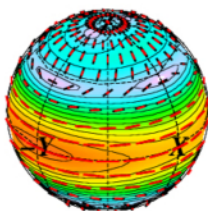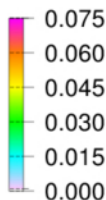

16.5 / 0.7 / 0.1 % \*\*

18.6 / 1.6 / 0.1 %

sec per km

**Cylindrical Fold**

Limb angle  $18^\circ$

**A/L = 0.05**

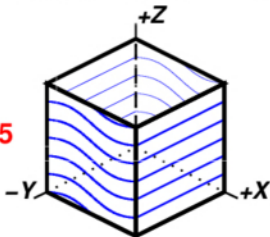

Orocopia Formation schist used as representative fabric.

\*\* Tensor symmetry decomposition percentages:

T.I. / orthorhombic / all lower symmetries.

**Elliptical T.I.**

**Full T.I.**

( $v_{45} = 28\%$ )

**VP**

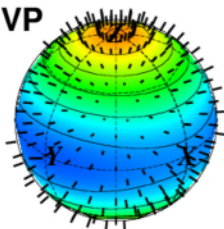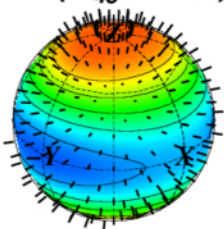

**$\Delta t$**

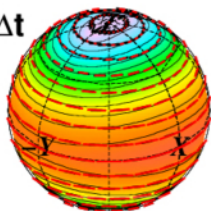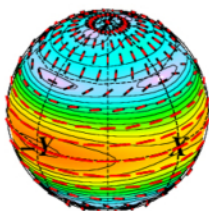

16.3 / 0.8 / 0.1 % \*\*

18.2 / 1.7 / 0.1 %

*sec per km*

**Cylindrical Fold**

Limb angle  $19^\circ$

**A/L = 0.05**

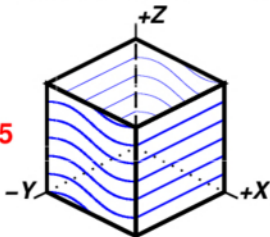

Orocopia Formation schist used as representative fabric.

\*\* Tensor symmetry decomposition percentages:

T.I. / orthorhombic / all lower symmetries.



***Elliptical T.I.***

***Full T.I.***

***( $v_{45} = 28\%$ )***

**VP**

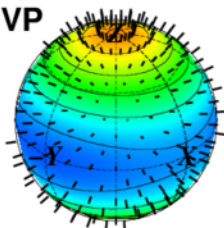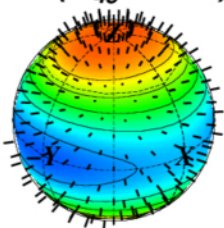

**$\Delta t$**

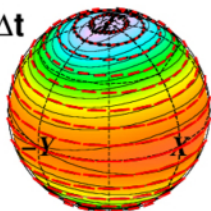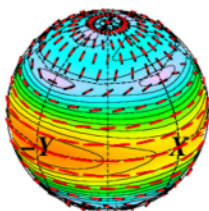

16.0 / 0.9 / 0.1 % \*\*

17.8 / 1.9 / 0.1 %

***sec per km***

**Cylindrical Fold**

**Limb angle  $20^\circ$**

**$A/L = 0.06$**

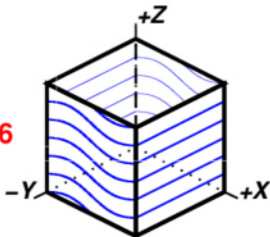

Orocopia Formation schist used as representative fabric.

\*\* Tensor symmetry decomposition percentages:

T.I. / orthorhombic / all lower symmetries.

***Elliptical T.I.***

***Full T.I.***

***( $v_{45} = 28\%$ )***

**VP**

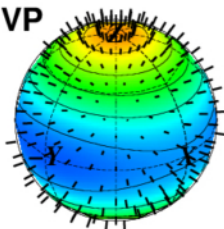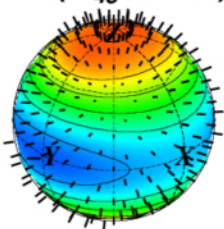

**$\Delta t$**

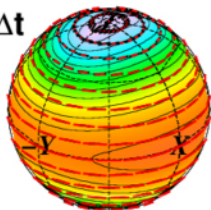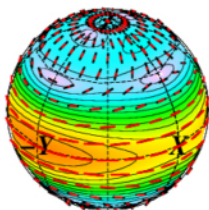

15.8 / 1.0 / 0.1 % \*\*

17.4 / 2.1 / 0.1 %

***sec per km***

**Cylindrical Fold**

**Limb angle  $21^\circ$**

**$A/L = 0.06$**

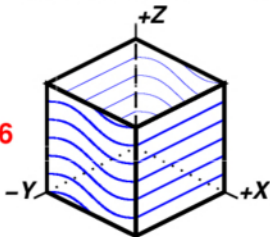

Orocopia Formation schist used as representative fabric.

\*\* Tensor symmetry decomposition percentages:

T.I. / orthorhombic / all lower symmetries.

***Elliptical T.I.***

***Full T.I.***

***( $v_{45} = 28\%$ )***

**VP**

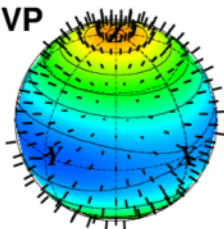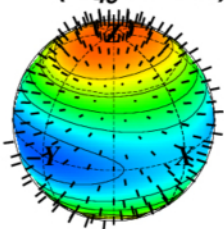

**$\Delta t$**

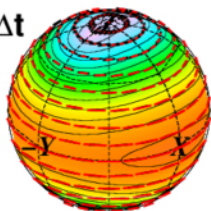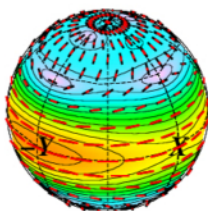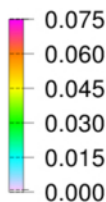

15.5 / 1.1 / 0.1 % \*\*

16.9 / 2.3 / 0.1 %

***sec per km***

**Cylindrical Fold**

**Limb angle  $22^\circ$**

**$A/L = 0.06$**

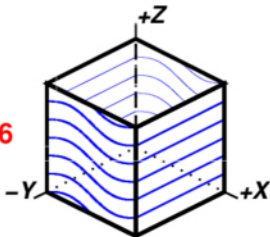

Orocopia Formation schist used as representative fabric.

\*\* Tensor symmetry decomposition percentages:

T.I. / orthorhombic / all lower symmetries.

**Elliptical T.I.**

**Full T.I.**

( $v_{45} = 28\%$ )

**VP**

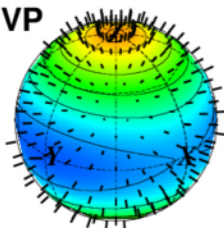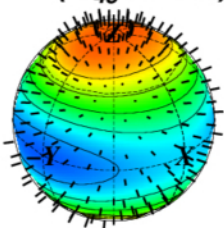

**$\Delta t$**

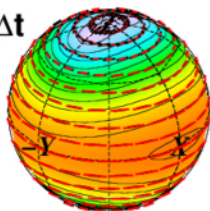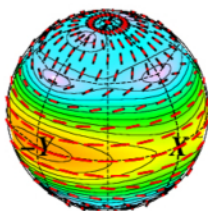

15.2 / 1.2 / 0.1 % \*\*

16.5 / 2.5 / 0.1 %

*sec per km*

**Cylindrical Fold**

Limb angle  $23^\circ$

**$A/L = 0.07$**

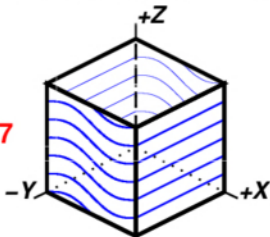

Orocopia Formation schist used as representative fabric.

\*\* Tensor symmetry decomposition percentages:

T.I. / orthorhombic / all lower symmetries.

***Elliptical T.I.***

***Full T.I.***

***( $v_{45} = 28\%$ )***

**VP**

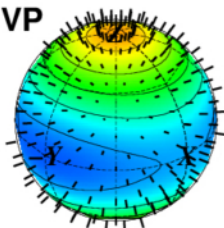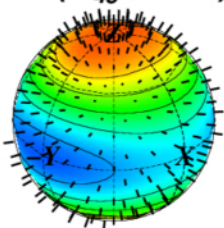

**$\Delta t$**

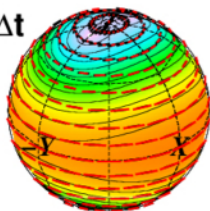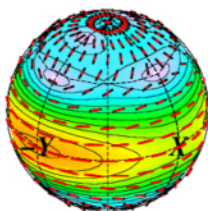

14.9 / 1.3 / 0.1 % \*\*

16.1 / 2.7 / 0.1 %

***sec per km***

**Cylindrical Fold**

**Limb angle  $24^\circ$**

**$A/L = 0.07$**

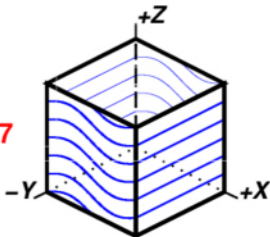

Orocopia Formation schist used as representative fabric.

\*\* Tensor symmetry decomposition percentages:

T.I. / orthorhombic / all lower symmetries.

**Elliptical T.I.**

**Full T.I.**

( $v_{45} = 28\%$ )

**VP**

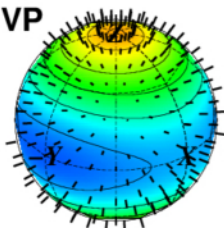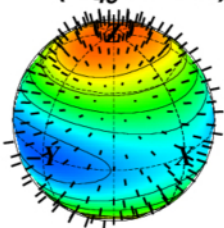

**$\Delta t$**

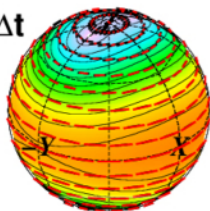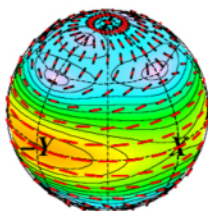

14.6 / 1.4 / 0.1 % \*\*

15.6 / 2.9 / 0.1 %

*sec per km*

**Cylindrical Fold**

Limb angle  $25^\circ$

**$A/L = 0.07$**

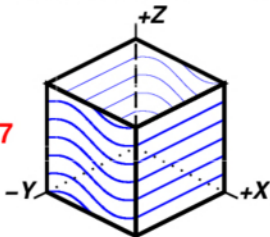

Orocopia Formation schist used as representative fabric.

\*\* Tensor symmetry decomposition percentages:

T.I. / orthorhombic / all lower symmetries.

**Elliptical T.I.**

**Full T.I.**

( $v_{45} = 28\%$ )

**VP**

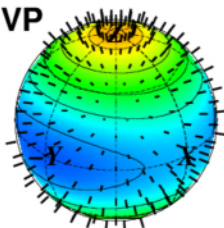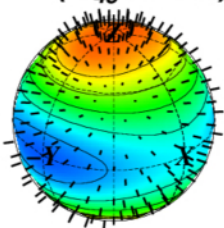

**$\Delta t$**

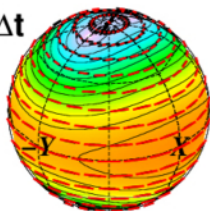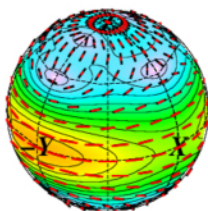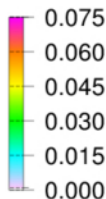

14.3 / 1.5 / 0.1 % \*\*

15.1 / 3.1 / 0.2 %

*sec per km*

**Cylindrical Fold**

Limb angle  $26^\circ$

**A/L = 0.08**

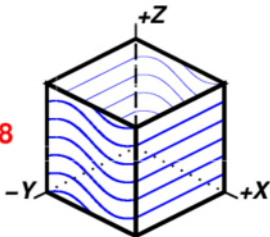

Orocopia Formation schist used as representative fabric.

\*\* Tensor symmetry decomposition percentages:

T.I. / orthorhombic / all lower symmetries.

**Elliptical T.I.**

**Full T.I.**

( $v_{45} = 28\%$ )

**VP**

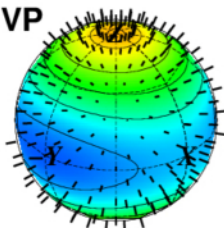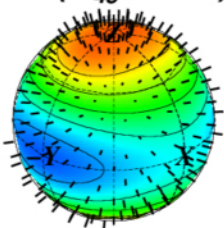

**$\Delta t$**

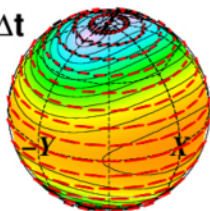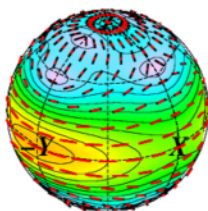

13.9 / 1.7 / 0.1 % \*\*

14.7 / 3.3 / 0.2 %

**sec per km**

**Cylindrical Fold**

**Limb angle  $27^\circ$**

**$A/L = 0.08$**

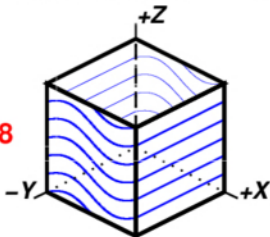

Orocopia Formation schist used as representative fabric.

\*\* Tensor symmetry decomposition percentages:

T.I. / orthorhombic / all lower symmetries.



**Elliptical T.I.**

**Full T.I.**

( $v_{45} = 28\%$ )

**VP**

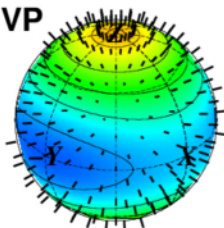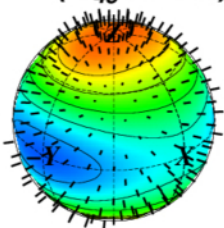

**$\Delta t$**

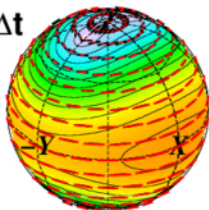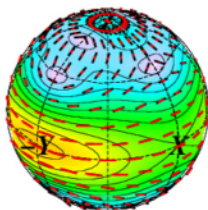

13.6 / 1.8 / 0.1 % \*\*

14.2 / 3.6 / 0.2 %

*sec per km*

**Cylindrical Fold**

**Limb angle  $28^\circ$**

**$A/L = 0.08$**

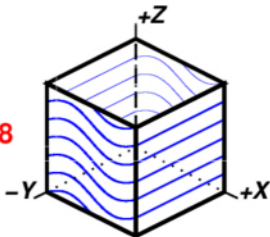

Orocopia Formation schist used as representative fabric.

\*\* Tensor symmetry decomposition percentages:

T.I. / orthorhombic / all lower symmetries.

**Elliptical T.I.**

**Full T.I.**

( $v_{45} = 28\%$ )

**VP**

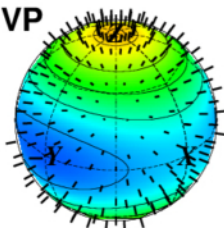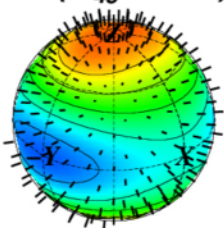

**$\Delta t$**

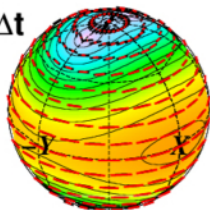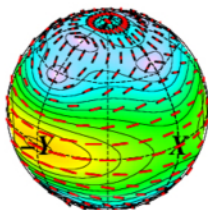

13.2 / 1.9 / 0.1 % \*\*

13.7 / 3.8 / 0.2 %

**sec per km**

**Cylindrical Fold**

**Limb angle  $29^\circ$**

**$A/L = 0.09$**

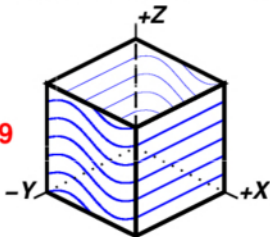

Orocopia Formation schist used as representative fabric.

\*\* Tensor symmetry decomposition percentages:

T.I. / orthorhombic / all lower symmetries.

**Elliptical T.I.**

**Full T.I.**

( $v_{45} = 28\%$ )

**VP**

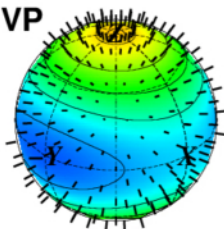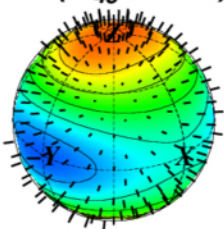

**$\Delta t$**

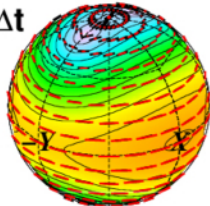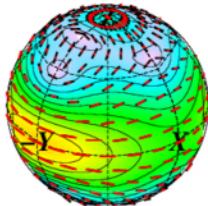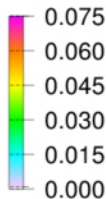

12.9 / 2.1 / 0.1 % \*\*

13.2 / 4.0 / 0.2 %

*sec per km*

**Cylindrical Fold**

Limb angle  $30^\circ$

**A/L = 0.09**

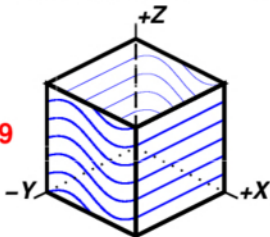

Orocopia Formation schist used as representative fabric.

\*\* Tensor symmetry decomposition percentages:

T.I. / orthorhombic / all lower symmetries.

**Elliptical T.I.**

**Full T.I.**

( $v_{45} = 28\%$ )

**VP**

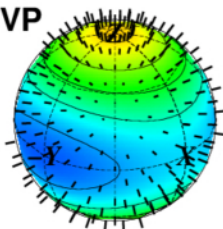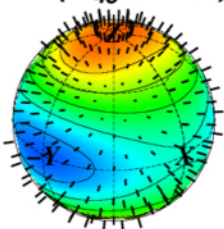

**$\Delta t$**

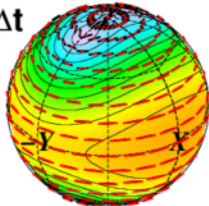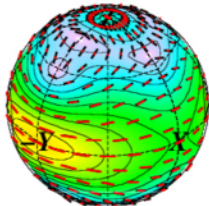

12.5 / 2.2 / 0.1 % \*\*

12.8 / 4.2 / 0.2 %

*sec per km*

**Cylindrical Fold**

Limb angle  $31^\circ$

**$A/L = 0.10$**

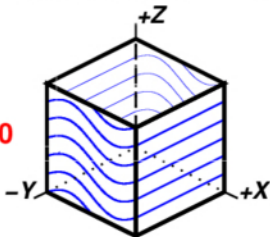

Orocopia Formation schist used as representative fabric.

\*\* Tensor symmetry decomposition percentages:

T.I. / orthorhombic / all lower symmetries.

**Elliptical T.I.**

**Full T.I.**

( $v_{45} = 28\%$ )

**VP**

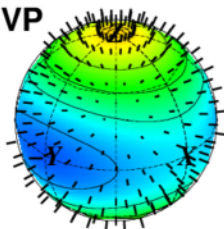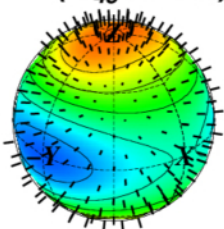

**$\Delta t$**

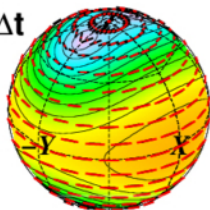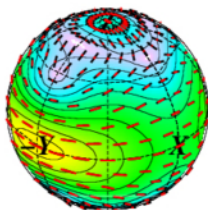

12.1 / 2.3 / 0.1 % \*\*

12.3 / 4.4 / 0.2 %

*sec per km*

**Cylindrical Fold**

Limb angle  $32^\circ$

**$A/L = 0.10$**

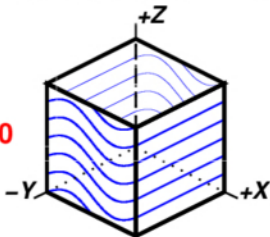

Orocopia Formation schist used as representative fabric.

\*\* Tensor symmetry decomposition percentages:

T.I. / orthorhombic / all lower symmetries.

**Elliptical T.I.**

**Full T.I.**

( $v_{45} = 28\%$ )

**VP**

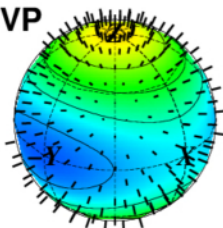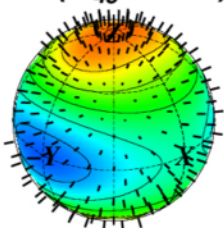

**$\Delta t$**

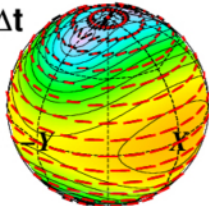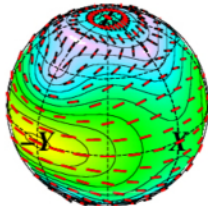

11.8 / 2.5 / 0.1 % \*\*

11.8 / 4.7 / 0.2 %

*sec per km*

**Cylindrical Fold**

**Limb angle  $33^\circ$**

**$A/L = 0.10$**

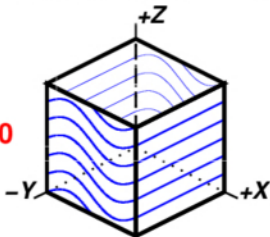

Orocopia Formation schist used as representative fabric.

\*\* Tensor symmetry decomposition percentages:

T.I. / orthorhombic / all lower symmetries.

**Elliptical T.I.**

**Full T.I.**

( $v_{45} = 28\%$ )

**VP**

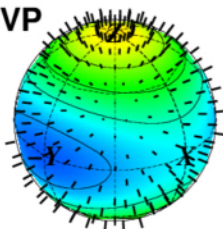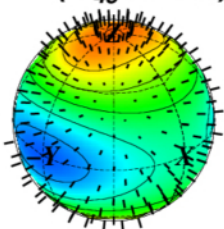

**$\Delta t$**

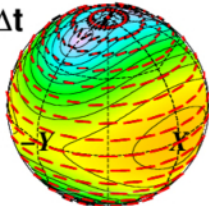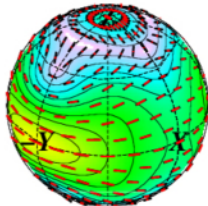

11.4 / 2.6 / 0.1 % \*\*

11.3 / 4.9 / 0.2 %

*sec per km*

**Cylindrical Fold**

Limb angle  $34^\circ$

**A/L = 0.11**

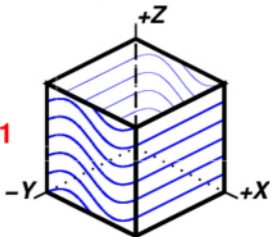

Orocopia Formation schist used as representative fabric.

\*\* Tensor symmetry decomposition percentages:

T.I. / orthorhombic / all lower symmetries.

**Elliptical T.I.**

**Full T.I.**

( $v_{45} = 28\%$ )

**VP**

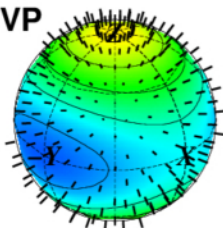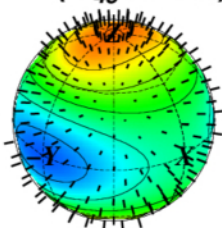

**$\Delta t$**

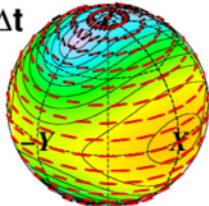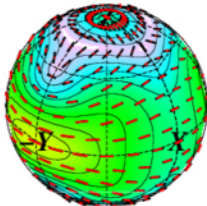

11.0 / 2.8 / 0.1 % \*\*

10.8 / 5.1 / 0.2 %

*sec per km*

**Cylindrical Fold**

**Limb angle  $35^\circ$**

**$A/L = 0.11$**

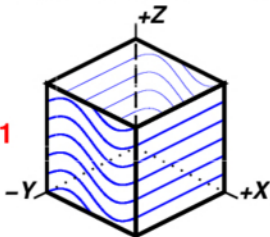

Orocopia Formation schist used as representative fabric.

\*\* Tensor symmetry decomposition percentages:

T.I. / orthorhombic / all lower symmetries.



**Elliptical T.I.**

**Full T.I.**

( $v_{45} = 28\%$ )

**VP**

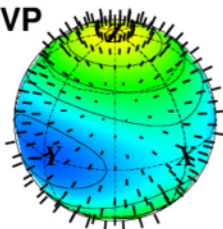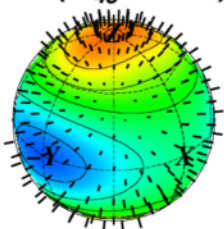

**$\Delta t$**

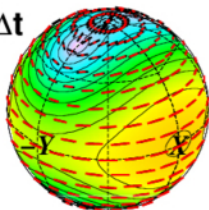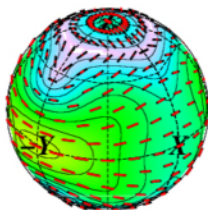

10.6 / 3.0 / 0.1 % \*\*

10.3 / 5.3 / 0.2 %

**sec per km**

**Cylindrical Fold**

**Limb angle  $36^\circ$**

**$A/L = 0.12$**

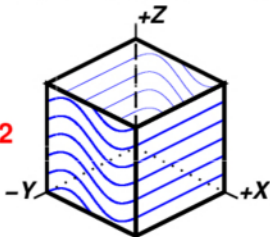

Orocopia Formation schist used as representative fabric.

\*\* Tensor symmetry decomposition percentages:

T.I. / orthorhombic / all lower symmetries.

**Elliptical T.I.**

**Full T.I.**

( $v_{45} = 28\%$ )

**VP**

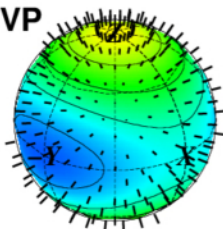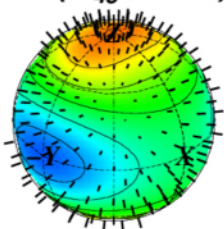

**$\Delta t$**

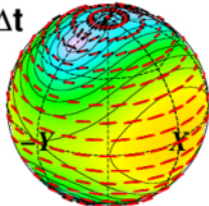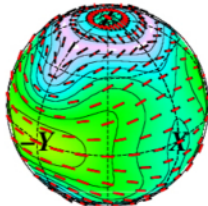

10.1 / 3.1 / 0.1 % \*\*

9.9 / 5.5 / 0.2 %

*sec per km*

**Cylindrical Fold**

**Limb angle  $37^\circ$**

**$A/L = 0.12$**

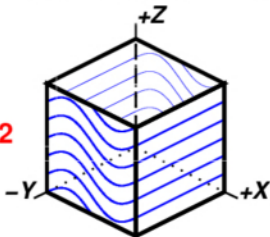

Orocopia Formation schist used as representative fabric.

\*\* Tensor symmetry decomposition percentages:

T.I. / orthorhombic / all lower symmetries.

**Elliptical T.I.**

**Full T.I.**

( $v_{45} = 28\%$ )

**VP**

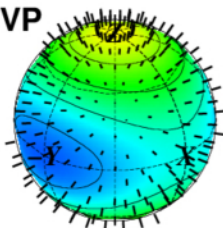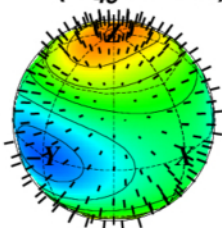

**$\Delta t$**

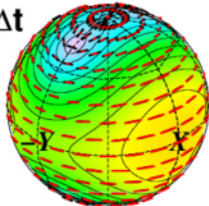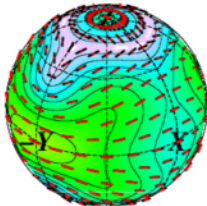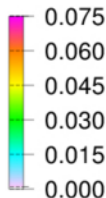

9.7 / 3.3 / 0.2% \*\*

9.4 / 5.8 / 0.2%

*sec per km*

**Cylindrical Fold**

**Limb angle  $38^\circ$**

**$A/L = 0.12$**

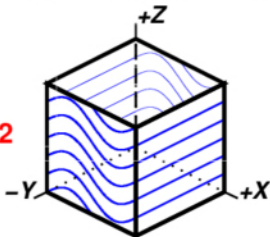

Orocopia Formation schist used as representative fabric.

\*\* Tensor symmetry decomposition percentages:

T.I. / orthorhombic / all lower symmetries.

**Elliptical T.I.**

**Full T.I.**

( $v_{45} = 28\%$ )

**VP**

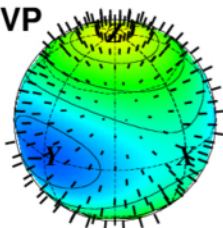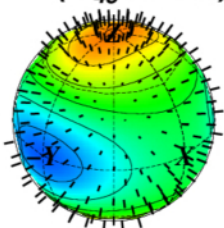

**$\Delta t$**

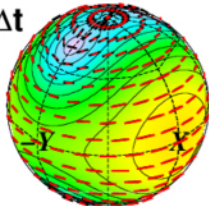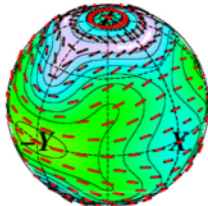

9.3 / 3.5 / 0.2% \*\*

8.9 / 6.0 / 0.2%

sec per km

**Cylindrical Fold**

Limb angle  $39^\circ$

**A/L = 0.13**

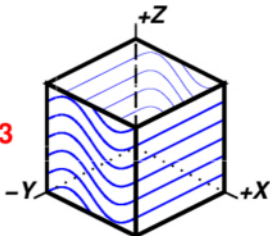

Orocopia Formation schist used as representative fabric.

\*\* Tensor symmetry decomposition percentages:

T.I. / orthorhombic / all lower symmetries.

**Elliptical T.I.**

**Full T.I.**

( $v_{45} = 28\%$ )

**VP**

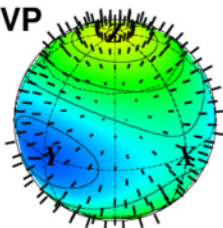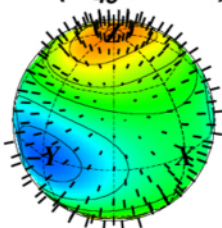

**$\Delta t$**

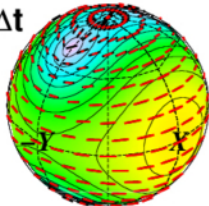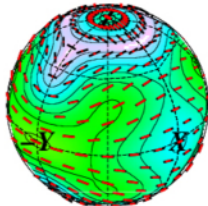

8.9 / 3.6 / 0.2% \*\*

8.5 / 6.2 / 0.2%

*sec per km*

**Cylindrical Fold**

**Limb angle  $40^\circ$**

**$A/L = 0.13$**

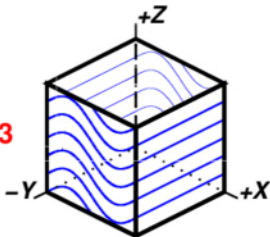

Orocopia Formation schist used as representative fabric.

\*\* Tensor symmetry decomposition percentages:

T.I. / orthorhombic / all lower symmetries.

**Elliptical T.I.**

**Full T.I.**

( $v_{45} = 28\%$ )

**VP**

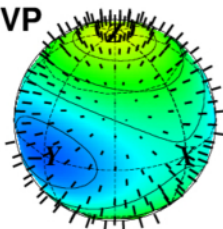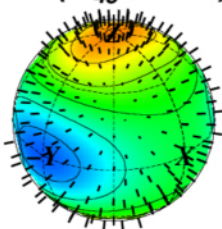

**$\Delta t$**

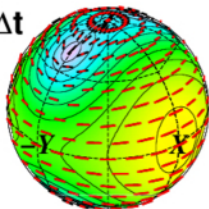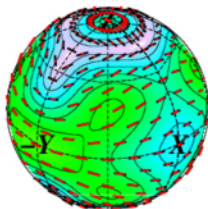

8.4 / 3.8 / 0.2% \*\*

8.0 / 6.4 / 0.2%

sec per km

**Cylindrical Fold**

Limb angle  $41^\circ$

**$A/L = 0.14$**

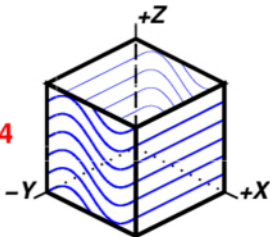

Orocopia Formation schist used as representative fabric.

\*\* Tensor symmetry decomposition percentages:

T.I. / orthorhombic / all lower symmetries.

**Elliptical T.I.**

**Full T.I.**

( $v_{45} = 28\%$ )

**VP**

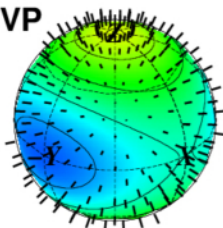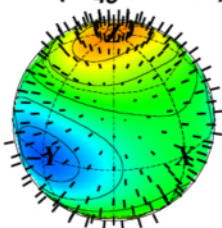

**$\Delta t$**

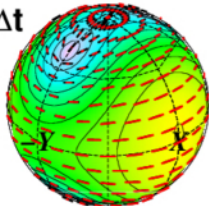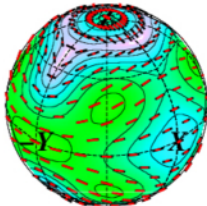

8.0 / 4.0 / 0.2% \*\*

7.5 / 6.6 / 0.2%

*sec per km*

**Cylindrical Fold**

Limb angle  $42^\circ$

**$A/L = 0.14$**

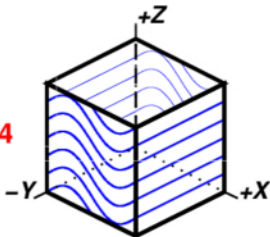

Orocopia Formation schist used as representative fabric.

\*\* Tensor symmetry decomposition percentages:

T.I. / orthorhombic / all lower symmetries.

**Elliptical T.I.**

**Full T.I.**

( $v_{45} = 28\%$ )

**VP**

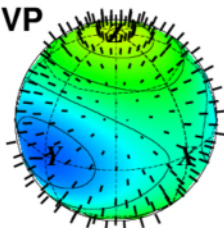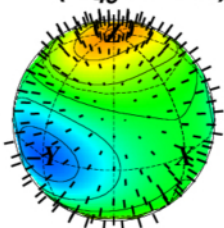

**$\Delta t$**

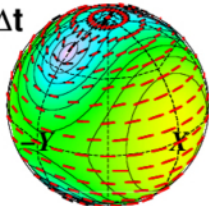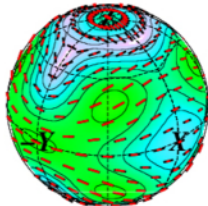

7.6 / 4.2 / 0.2% \*\*

7.1 / 6.8 / 0.2%

sec per km

**Cylindrical Fold**

Limb angle  $43^\circ$

**A/L = 0.15**

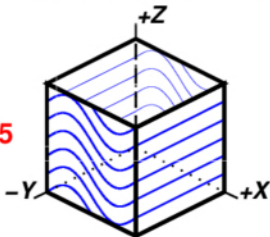

Orocopia Formation schist used as representative fabric.

\*\* Tensor symmetry decomposition percentages:

T.I. / orthorhombic / all lower symmetries.



**Elliptical T.I.**

**Full T.I.**

( $v_{45} = 28\%$ )

**VP**

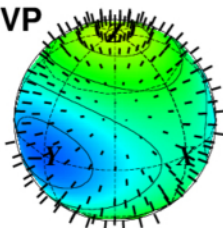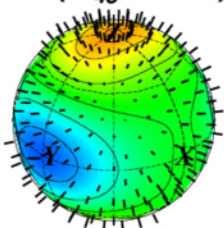

**$\Delta t$**

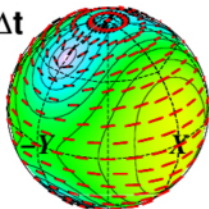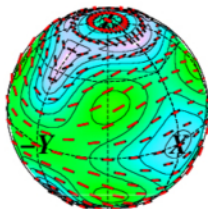

7.1 / 4.4 / 0.2% \*\*

6.7 / 7.0 / 0.2%

*sec per km*

**Cylindrical Fold**

**Limb angle  $44^\circ$**

**$A/L = 0.15$**

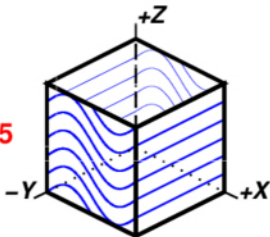

Orocopia Formation schist used as representative fabric.

\*\* Tensor symmetry decomposition percentages:

T.I. / orthorhombic / all lower symmetries.

**Elliptical T.I.**

**Full T.I.**

( $v_{45} = 28\%$ )

**VP**

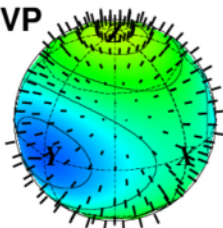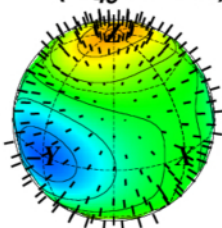

**$\Delta t$**

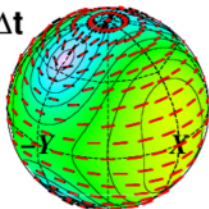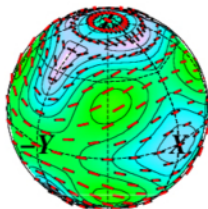

6.7 / 4.6 / 0.2% \*\*

6.2 / 7.2 / 0.3%

*sec per km*

**Cylindrical Fold**

Limb angle  $45^\circ$

**A/L = 0.16**

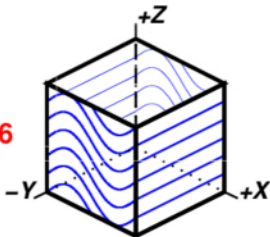

Orocopia Formation schist used as representative fabric.

\*\* Tensor symmetry decomposition percentages:

T.I. / orthorhombic / all lower symmetries.

**Elliptical T.I.**

**Full T.I.**

( $v_{45} = 28\%$ )

**VP**

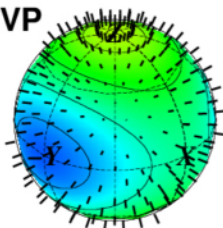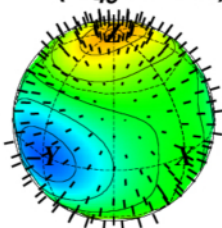

**$\Delta t$**

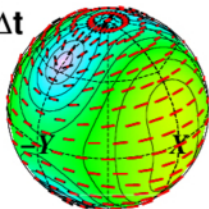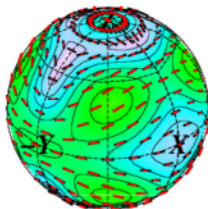

6.3 / 4.8 / 0.2% \*\*

6.1 / 6.9 / 0.5%

*sec per km*

**Cylindrical Fold**

Limb angle  $46^\circ$

**A/L = 0.16**

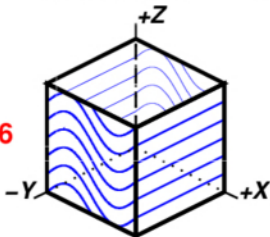

Orocopia Formation schist used as representative fabric.

\*\* Tensor symmetry decomposition percentages:

T.I. / orthorhombic / all lower symmetries.

**Elliptical T.I.**

**Full T.I.**

( $v_{45} = 28\%$ )

**VP**

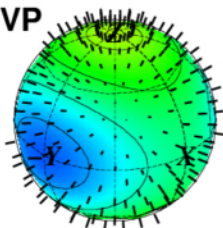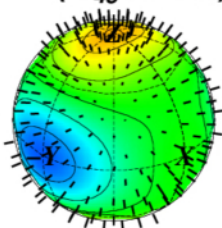

**$\Delta t$**

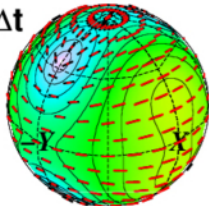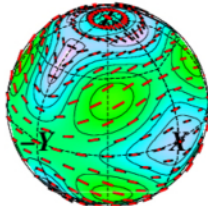

5.8 / 5.0 / 0.2% \*\*

6.3 / 6.4 / 0.6%

*sec per km*

**Cylindrical Fold**

Limb angle  $47^\circ$

**$A/L = 0.17$**

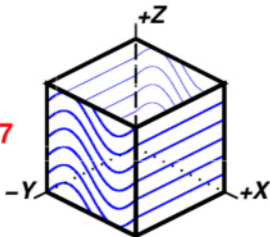

Orocopia Formation schist used as representative fabric.

\*\* Tensor symmetry decomposition percentages:

T.I. / orthorhombic / all lower symmetries.

**Elliptical T.I.**

**Full T.I.**

( $v_{45} = 28\%$ )

**VP**

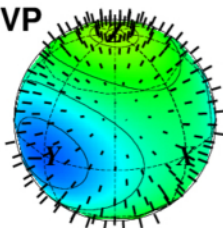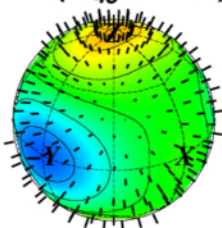

**$\Delta t$**

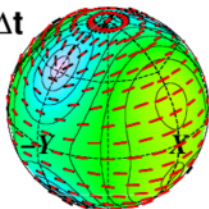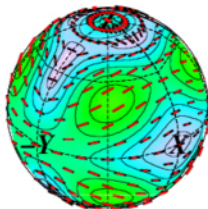

5.4 / 5.2 / 0.2% \*\*

6.5 / 5.9 / 0.7%

*sec per km*

**Cylindrical Fold**

**Limb angle  $48^\circ$**

**$A/L = 0.18$**

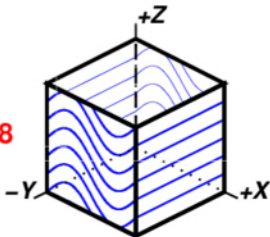

Orocopia Formation schist used as representative fabric.

\*\* Tensor symmetry decomposition percentages:

T.I. / orthorhombic / all lower symmetries.

**Elliptical T.I.**

**Full T.I.**

( $v_{45} = 28\%$ )

**VP**

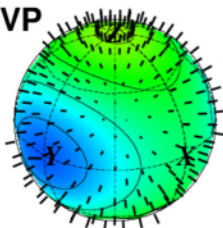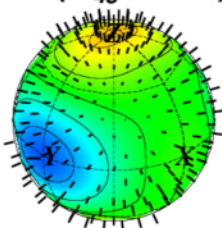

**$\Delta t$**

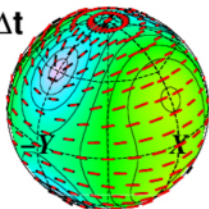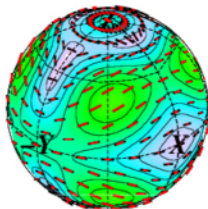

5.5 / 4.9 / 0.2% \*\*

6.7 / 5.4 / 0.8%

*sec per km*

**Cylindrical Fold**

**Limb angle  $49^\circ$**

**$A/L = 0.18$**

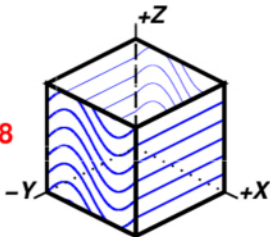

Orocopia Formation schist used as representative fabric.

\*\* Tensor symmetry decomposition percentages:

T.I. / orthorhombic / all lower symmetries.

**Elliptical T.I.**

**Full T.I.**

( $v_{45} = 28\%$ )

**VP**

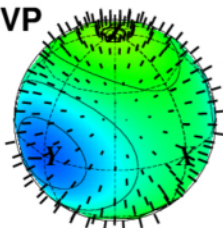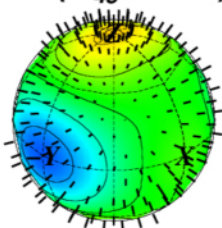

**$\Delta t$**

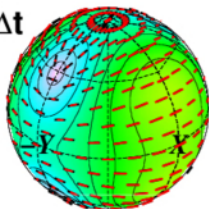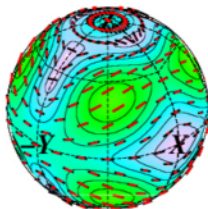

5.7 / 4.5 / 0.2% \*\*

6.8 / 4.9 / 0.9%

*sec per km*

**Cylindrical Fold**

Limb angle  $50^\circ$

**A/L = 0.19**

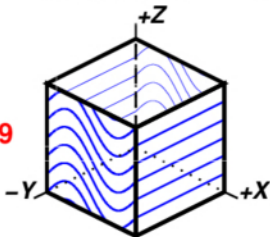

Orocopia Formation schist used as representative fabric.

\*\* Tensor symmetry decomposition percentages:

T.I. / orthorhombic / all lower symmetries.

**Elliptical T.I.**

**Full T.I.**

( $v_{45} = 28\%$ )

**VP**

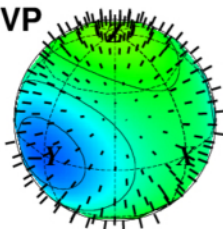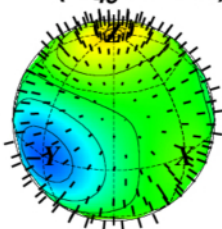

**$\Delta t$**

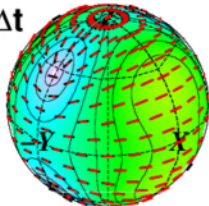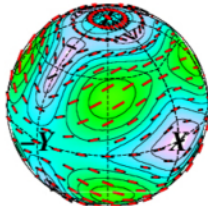

6.0 / 4.0 / 0.2% \*\*

7.0 / 4.4 / 1.1%

*sec per km*

**Cylindrical Fold**

Limb angle  $51^\circ$

**A/L = 0.20**

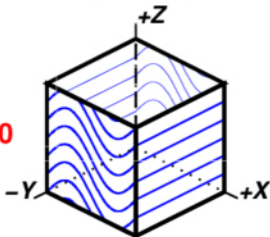

Orocopia Formation schist used as representative fabric.

\*\* Tensor symmetry decomposition percentages:

T.I. / orthorhombic / all lower symmetries.



**Elliptical T.I.**

**Full T.I.**

( $v_{45} = 28\%$ )

**VP**

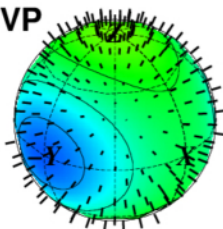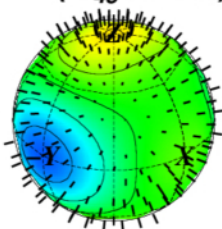

**$\Delta t$**

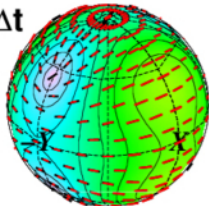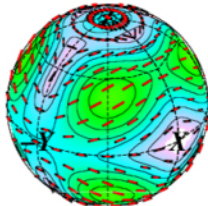

6.3 / 3.6 / 0.2% \*\*

7.2 / 3.9 / 1.2%

*sec per km*

**Cylindrical Fold**

Limb angle  $52^\circ$

**$A/L = 0.20$**

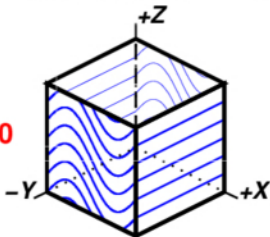

Orocopia Formation schist used as representative fabric.

\*\* Tensor symmetry decomposition percentages:

T.I. / orthorhombic / all lower symmetries.

**Elliptical T.I.**

**Full T.I.**

( $v_{45} = 28\%$ )

**VP**

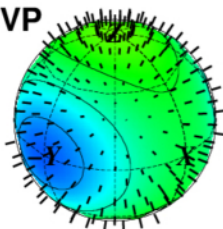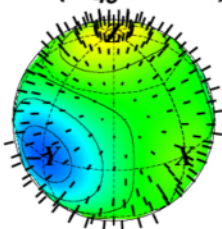

**$\Delta t$**

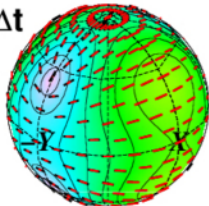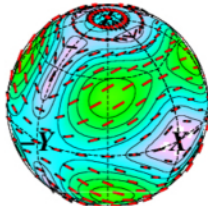

6.6 / 3.1 / 0.2% \*\*

7.4 / 3.4 / 1.4%

*sec per km*

**Cylindrical Fold**

Limb angle  $53^\circ$

**A/L = 0.21**

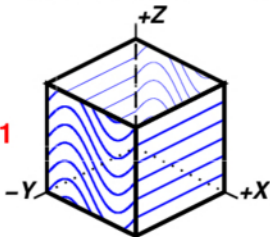

Orocopia Formation schist used as representative fabric.

\*\* Tensor symmetry decomposition percentages:

T.I. / orthorhombic / all lower symmetries.

**Elliptical T.I.**

**Full T.I.**

( $v_{45} = 28\%$ )

**VP**

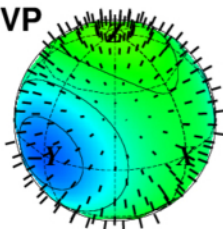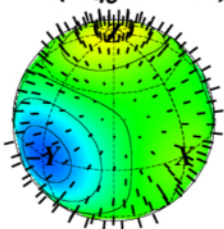

**$\Delta t$**

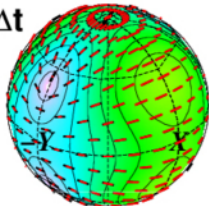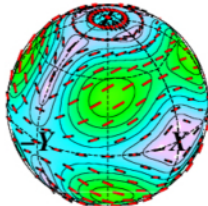

6.9 / 2.7 / 0.2% \*\*

7.6 / 2.8 / 1.7%

sec per km

**Cylindrical Fold**

Limb angle  $54^\circ$

**$A/L = 0.22$**

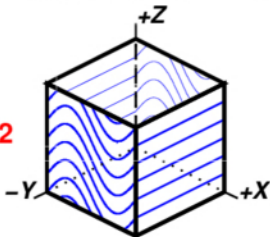

Orocopia Formation schist used as representative fabric.

\*\* Tensor symmetry decomposition percentages:

T.I. / orthorhombic / all lower symmetries.

**Elliptical T.I.**

**Full T.I.**

( $v_{45} = 28\%$ )

**VP**

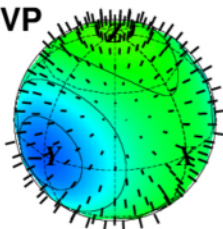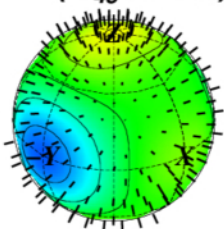

**$\Delta t$**

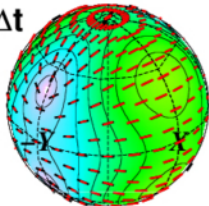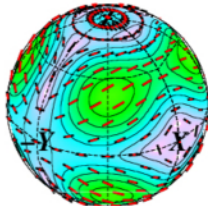

7.2 / 2.2 / 0.2% \*\*

7.7 / 2.2 / 1.9%

sec per km

**Cylindrical Fold**

Limb angle  $55^\circ$

**A/L = 0.23**

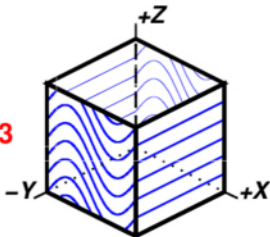

Orocopia Formation schist used as representative fabric.

\*\* Tensor symmetry decomposition percentages:

T.I. / orthorhombic / all lower symmetries.

**Elliptical T.I.**

**Full T.I.**

( $v_{45} = 28\%$ )

**VP**

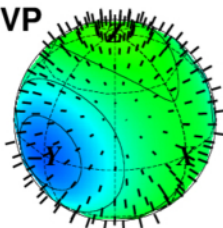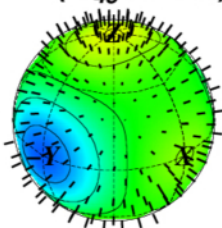

**$\Delta t$**

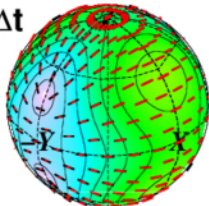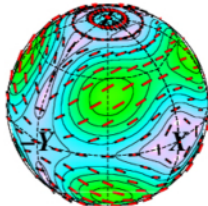

7.6 / 1.7 / 0.2% \*\*

7.9 / 1.6 / 2.3%

*sec per km*

**Cylindrical Fold**

**Limb angle  $56^\circ$**

**$A/L = 0.24$**

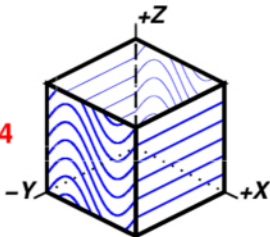

Orocopia Formation schist used as representative fabric.

\*\* Tensor symmetry decomposition percentages:

T.I. / orthorhombic / all lower symmetries.

**Elliptical T.I.**

**Full T.I.**

( $v_{45} = 28\%$ )

**VP**

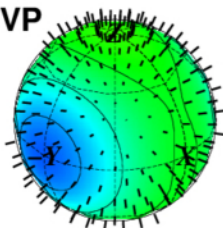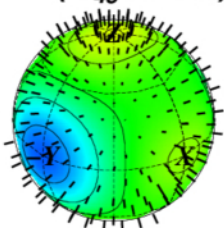

**$\Delta t$**

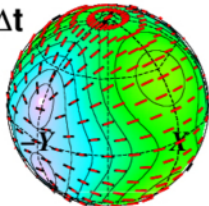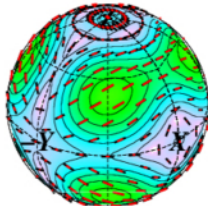

7.9 / 1.2 / 0.2% \*\*

8.0 / 1.0 / 2.6%

*sec per km*

**Cylindrical Fold**

Limb angle  $57^\circ$

**$A/L = 0.25$**

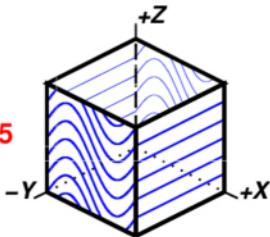

Orocopia Formation schist used as representative fabric.

\*\* Tensor symmetry decomposition percentages:

T.I. / orthorhombic / all lower symmetries.

**Elliptical T.I.**

**Full T.I.**

( $v_{45} = 28\%$ )

**VP**

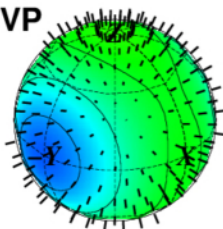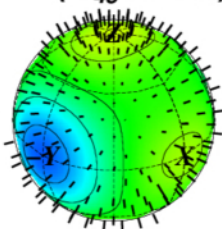

**$\Delta t$**

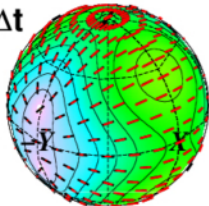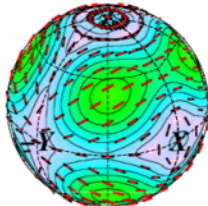

8.3 / 0.7 / 0.3% \*\*

8.1 / 0.4 / 3.1%

*sec per km*

**Cylindrical Fold**

**Limb angle  $58^\circ$**

**$A/L = 0.25$**

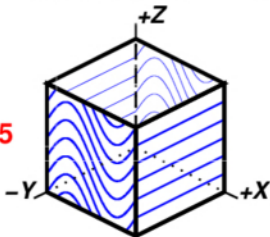

Orocopia Formation schist used as representative fabric.

\*\* Tensor symmetry decomposition percentages:

T.I. / orthorhombic / all lower symmetries.

**Elliptical T.I.**

**Full T.I.**

( $v_{45} = 28\%$ )

**VP**

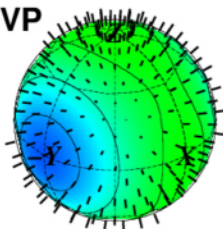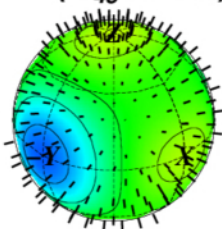

**$\Delta t$**

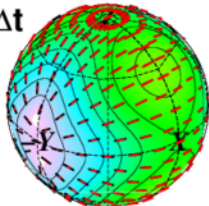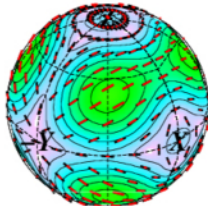

8.6 / 0.2 / 0.5% \*\*

8.1 / 0.1 / 3.3%

sec per km

**Cylindrical Fold**

Limb angle  $59^\circ$

**$A/L = 0.26$**

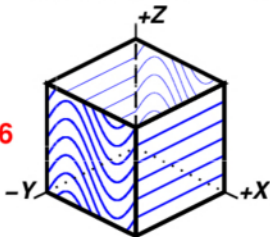

Orocopia Formation schist used as representative fabric.

\*\* Tensor symmetry decomposition percentages:

T.I. / orthorhombic / all lower symmetries.



**Elliptical T.I.**

**Full T.I.**

( $v_{45} = 28\%$ )

**VP**

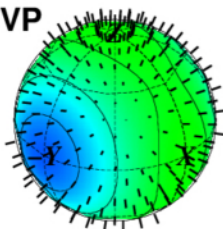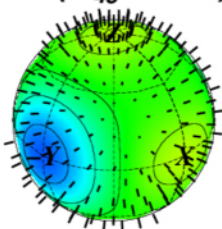

**$\Delta t$**

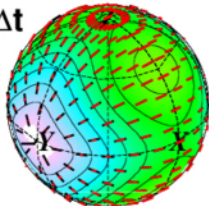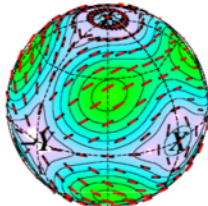

8.7 / 0.0 / 0.6% \*\*

8.1 / 0.0 / 3.3%

sec per km

**Cylindrical Fold**

Limb angle  $60^\circ$

**$A/L = 0.28$**

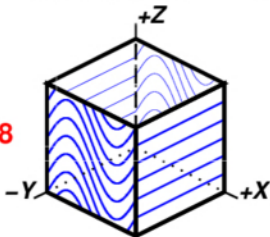

Orocopia Formation schist used as representative fabric.

\*\* Tensor symmetry decomposition percentages:

T.I. / orthorhombic / all lower symmetries.

**Elliptical T.I.**

**Full T.I.**

( $v_{45} = 28\%$ )

**VP**

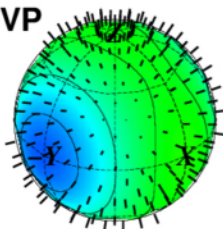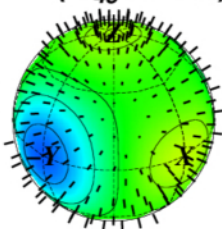

**$\Delta t$**

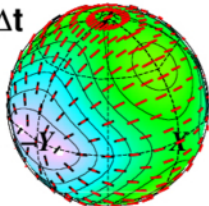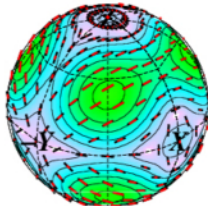

8.5 / 0.4 / 0.5% \*\*

8.1 / 0.1 / 3.2%

*sec per km*

**Cylindrical Fold**

Limb angle  $61^\circ$

**A/L = 0.29**

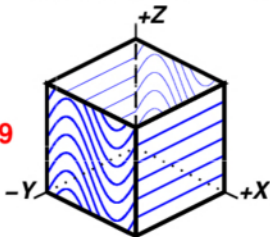

Orocopia Formation schist used as representative fabric.

\*\* Tensor symmetry decomposition percentages:

T.I. / orthorhombic / all lower symmetries.

**Elliptical T.I.**

**Full T.I.**

( $v_{45} = 28\%$ )

**VP**

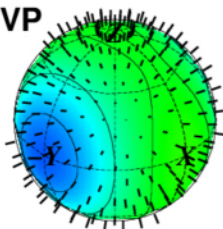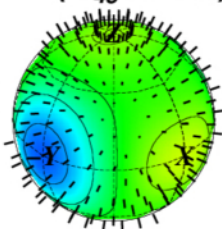

**$\Delta t$**

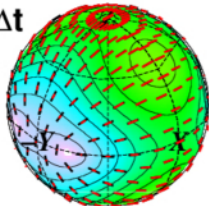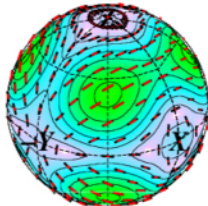

8.1 / 0.9 / 0.4% \*\*

8.0 / 0.6 / 2.8%

sec per km

**Cylindrical Fold**

Limb angle  $62^\circ$

**A/L = 0.30**

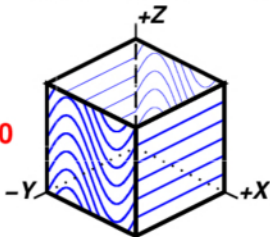

Orocopia Formation schist used as representative fabric.

\*\* Tensor symmetry decomposition percentages:

T.I. / orthorhombic / all lower symmetries.

**Elliptical T.I.**

**Full T.I.**

( $v_{45} = 28\%$ )

**VP**

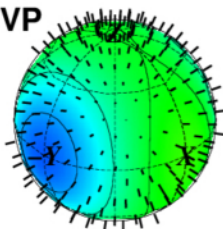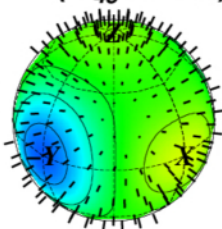

**$\Delta t$**

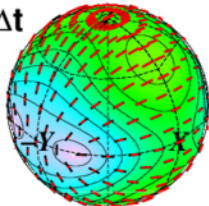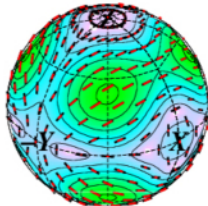

7.7 / 1.4 / 0.3% \*\*

7.8 / 1.3 / 2.4%

*sec per km*

**Cylindrical Fold**

Limb angle  $63^\circ$

**A/L = 0.31**

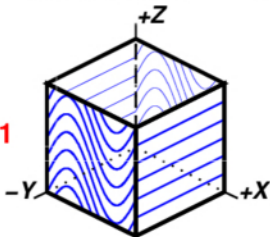

Orocopia Formation schist used as representative fabric.

\*\* Tensor symmetry decomposition percentages:

T.I. / orthorhombic / all lower symmetries.

**Elliptical T.I.**

**Full T.I.**

( $v_{45} = 28\%$ )

**VP**

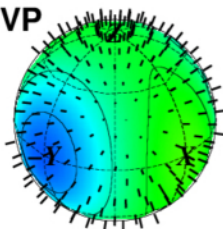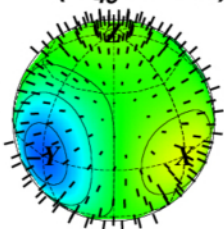

**$\Delta t$**

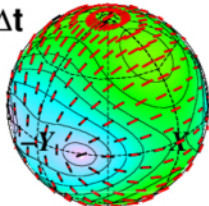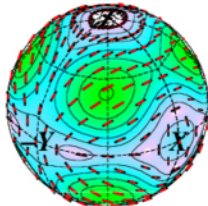

7.3 / 2.0 / 0.3% \*\*

7.6 / 1.9 / 2.0%

*sec per km*

**Cylindrical Fold**

Limb angle  $64^\circ$

**A/L = 0.33**

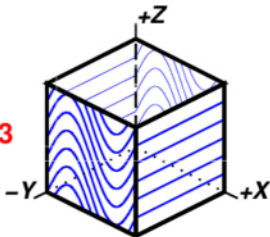

Orocopia Formation schist used as representative fabric.

\*\* Tensor symmetry decomposition percentages:

T.I. / orthorhombic / all lower symmetries.

**Elliptical T.I.**

**Full T.I.**

( $v_{45} = 28\%$ )

**VP**

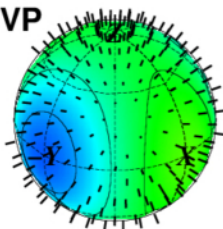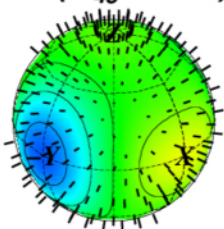

**$\Delta t$**

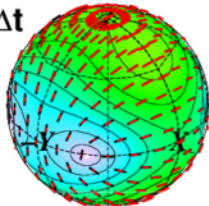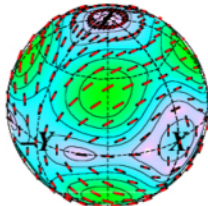

6.9 / 2.5 / 0.3% \*\*

7.4 / 2.5 / 1.6%

*sec per km*

**Cylindrical Fold**

Limb angle  $65^\circ$

**$A/L = 0.34$**

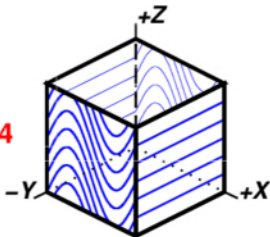

Orocopia Formation schist used as representative fabric.

\*\* Tensor symmetry decomposition percentages:

T.I. / orthorhombic / all lower symmetries.

**Elliptical T.I.**

**Full T.I.**

( $v_{45} = 28\%$ )

**VP**

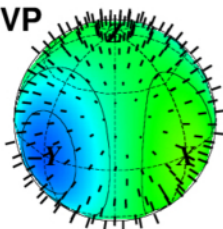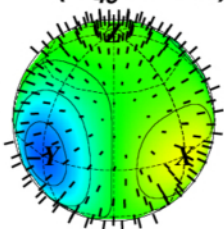

**$\Delta t$**

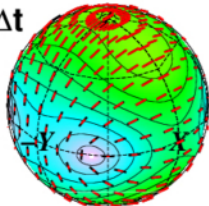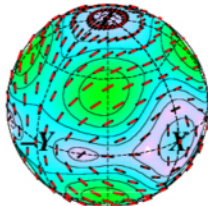

6.6 / 3.0 / 0.3% \*\*

7.1 / 3.2 / 1.4%

**sec per km**

**Cylindrical Fold**

**Limb angle  $66^\circ$**

**A/L = 0.36**

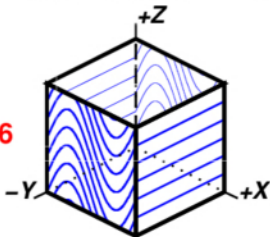

Orocopia Formation schist used as representative fabric.

\*\* Tensor symmetry decomposition percentages:

T.I. / orthorhombic / all lower symmetries.

**Elliptical T.I.**

**Full T.I.**

( $v_{45} = 28\%$ )

**VP**

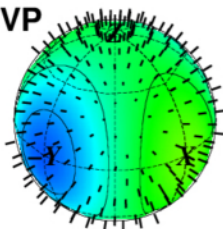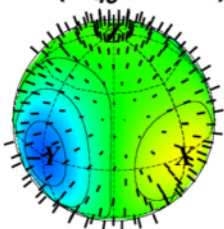

**m/s**  
7000  
6600  
6200  
5800  
5400  
5000

**$\Delta t$**

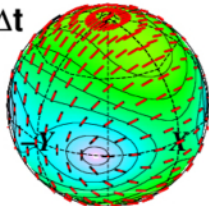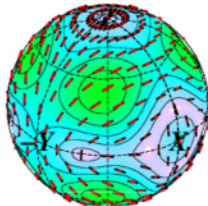

0.075  
0.060  
0.045  
0.030  
0.015  
0.000

6.2 / 3.5 / 0.3 % \*\*

6.9 / 3.8 / 1.1 %

**sec per km**

**Cylindrical Fold**

**Limb angle  $67^\circ$**

**$A/L = 0.37$**

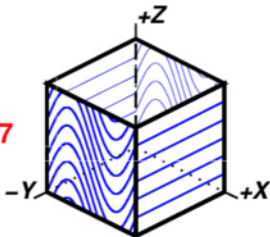

Orocopia Formation schist used as representative fabric.

\*\* Tensor symmetry decomposition percentages:

T.I. / orthorhombic / all lower symmetries.



***Elliptical T.I.***

***Full T.I.***

***( $v_{45} = 28\%$ )***

**VP**

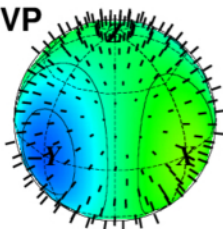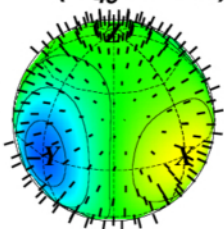

**$\Delta t$**

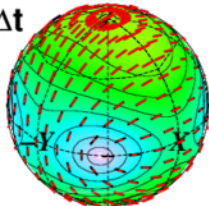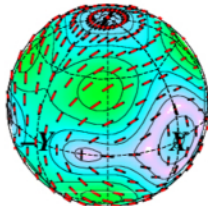

5.9 / 4.1 / 0.2% \*\*

6.6 / 4.4 / 0.9%

***sec per km***

**Cylindrical Fold**

**Limb angle  $68^\circ$**

**$A/L = 0.39$**

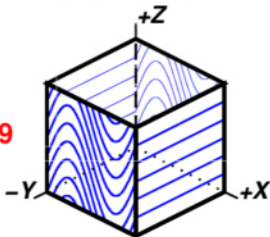

Orocopia Formation schist used as representative fabric.

\*\* Tensor symmetry decomposition percentages:

T.I. / orthorhombic / all lower symmetries.

**Elliptical T.I.**

**Full T.I.**

( $v_{45} = 28\%$ )

**VP**

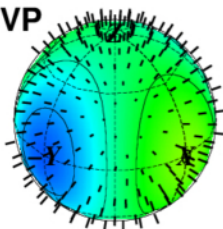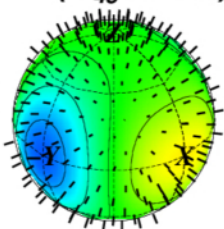

**m/s**  
7000  
6600  
6200  
5800  
5400  
5000

**$\Delta t$**

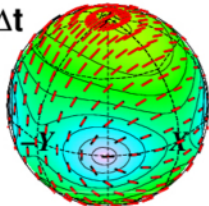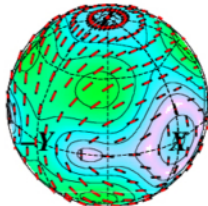

0.075  
0.060  
0.045  
0.030  
0.015  
0.000

5.6 / 4.6 / 0.2% \*\*

6.3 / 5.0 / 0.8%

**sec per km**

**Cylindrical Fold**

**Limb angle  $69^\circ$**

**$A/L = 0.41$**

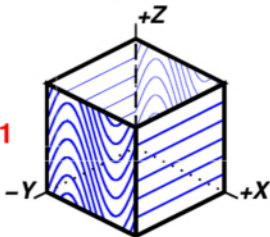

Orocopia Formation schist used as representative fabric.

\*\* Tensor symmetry decomposition percentages:

T.I. / orthorhombic / all lower symmetries.

**Elliptical T.I.**

**Full T.I.**

( $v_{45} = 28\%$ )

**VP**

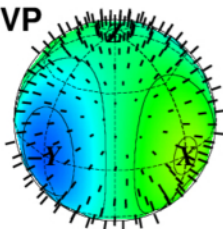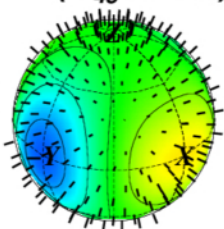

**$\Delta t$**

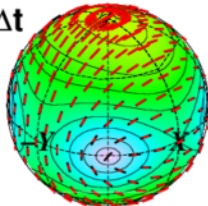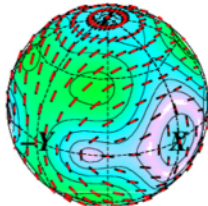

5.3 / 5.2 / 0.2% \*\*

6.1 / 5.6 / 0.6%

*sec per km*

**Cylindrical Fold**

Limb angle  $70^\circ$

**$A/L = 0.44$**

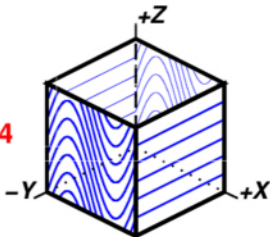

Orocopia Formation schist used as representative fabric.

\*\* Tensor symmetry decomposition percentages:

T.I. / orthorhombic / all lower symmetries.

**Elliptical T.I.**

**Full T.I.**

( $v_{45} = 28\%$ )

**VP**

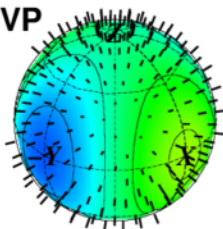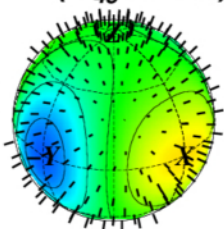

**$\Delta t$**

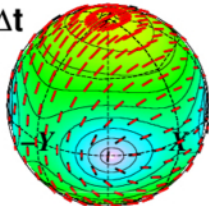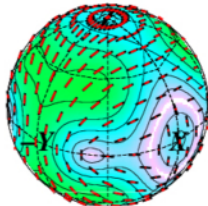

5.8 / 5.1 / 0.1 % \*\*

5.8 / 6.2 / 0.5 %

*sec per km*

**Cylindrical Fold**

Limb angle  $71^\circ$

**$A/L = 0.46$**

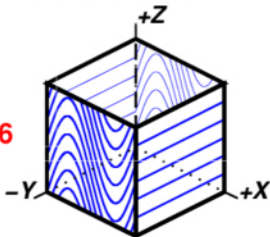

Orocopia Formation schist used as representative fabric.

\*\* Tensor symmetry decomposition percentages:

T.I. / orthorhombic / all lower symmetries.

**Elliptical T.I.**

**Full T.I.**

( $v_{45} = 28\%$ )

**VP**

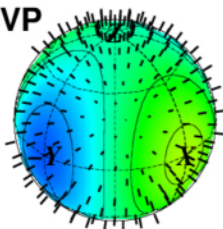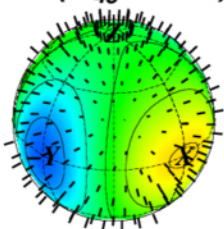

**$\Delta t$**

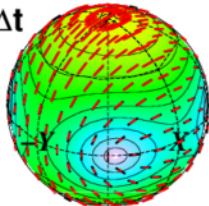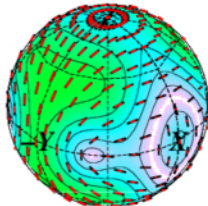

6.3 / 4.9 / 0.1 % \*\*

5.7 / 6.8 / 0.3 %

*sec per km*

**Cylindrical Fold**

**Limb angle  $72^\circ$**

**$A/L = 0.49$**

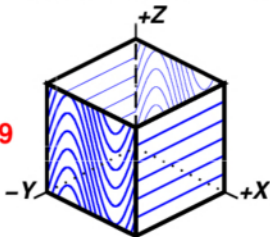

Orocopia Formation schist used as representative fabric.

\*\* Tensor symmetry decomposition percentages:

T.I. / orthorhombic / all lower symmetries.

**Elliptical T.I.**

**Full T.I.**

( $v_{45} = 28\%$ )

**VP**

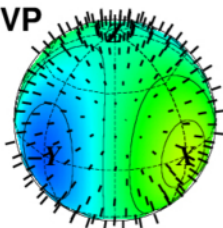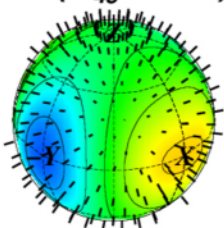

**$\Delta t$**

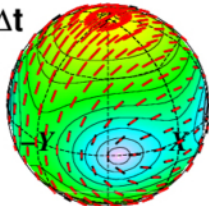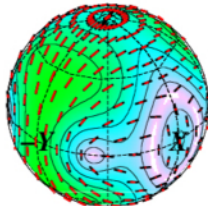

6.9 / 4.6 / 0.1 % \*\*

6.2 / 6.6 / 0.3 %

sec per km

**Cylindrical Fold**

Limb angle  $73^\circ$

**A/L = 0.52**

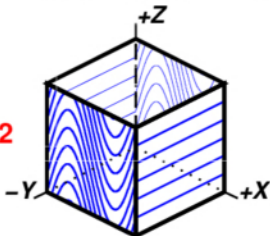

Orocopia Formation schist used as representative fabric.

\*\* Tensor symmetry decomposition percentages:

T.I. / orthorhombic / all lower symmetries.

**Elliptical T.I.**

**Full T.I.**

( $v_{45} = 28\%$ )

**VP**

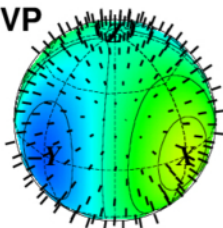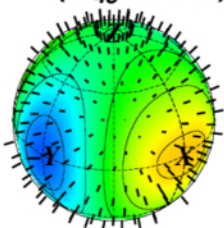

**$\Delta t$**

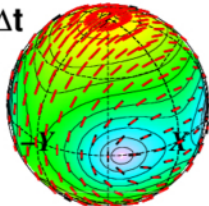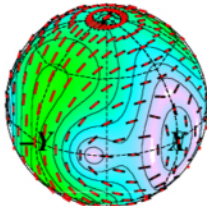

7.5 / 4.4 / 0.1 % \*\*

6.8 / 6.4 / 0.3 %

**sec per km**

**Cylindrical Fold**

**Limb angle 74°**

**A/L= 0.56**

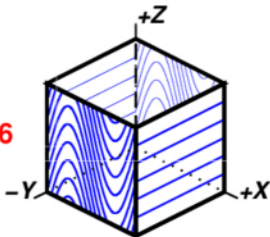

Orocopia Formation schist used as representative fabric.

\*\* Tensor symmetry decomposition percentages:

T.I. / orthorhombic / all lower symmetries.

**Elliptical T.I.**

**Full T.I.**

( $v_{45} = 28\%$ )

**VP**

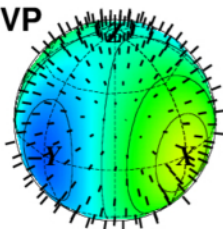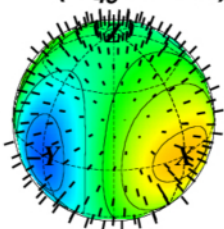

**$\Delta t$**

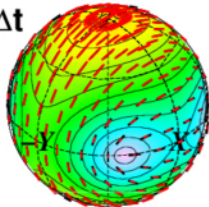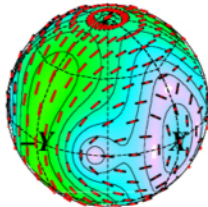

8.1 / 4.2 / 0.1 % \*\*

7.3 / 6.2 / 0.2 %

*sec per km*

**Cylindrical Fold**

Limb angle  $75^\circ$

**$A/L = 0.59$**

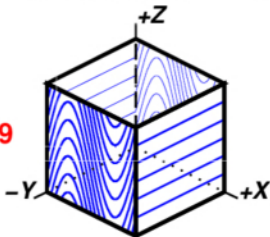

Orocopia Formation schist used as representative fabric.

\*\* Tensor symmetry decomposition percentages:

T.I. / orthorhombic / all lower symmetries.



**Elliptical T.I.**

**Full T.I.**

( $v_{45} = 28\%$ )

**VP**

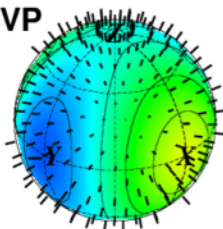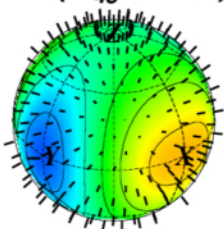

**$\Delta t$**

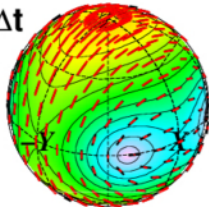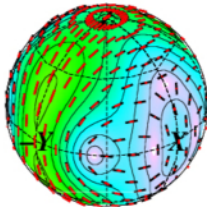

8.7 / 3.9 / 0.1 % \*\*

7.9 / 6.0 / 0.2 %

sec per km

**Cylindrical Fold**

Limb angle  $76^\circ$

**$A/L = 0.64$**

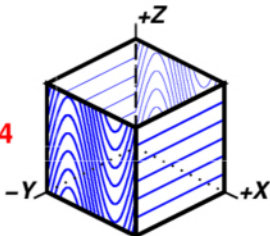

Orocopia Formation schist used as representative fabric.

\*\* Tensor symmetry decomposition percentages:

T.I. / orthorhombic / all lower symmetries.

**Elliptical T.I.**

**Full T.I.**

( $v_{45} = 28\%$ )

**VP**

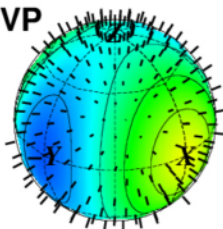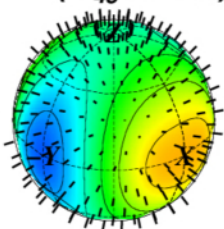

**$\Delta t$**

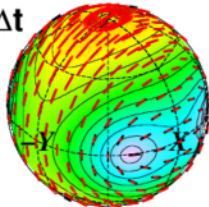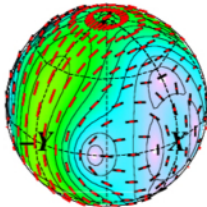

9.3 / 3.7 / 0.1 % \*\*

8.5 / 5.9 / 0.2 %

*sec per km*

**Cylindrical Fold**

Limb angle  $77^\circ$

**A/L = 0.69**

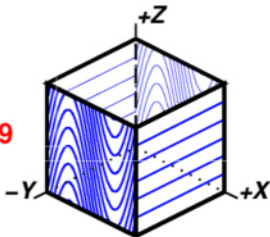

Orocopia Formation schist used as representative fabric.

\*\* Tensor symmetry decomposition percentages:

T.I. / orthorhombic / all lower symmetries.

**Elliptical T.I.**

**Full T.I.**

( $v_{45} = 28\%$ )

**VP**

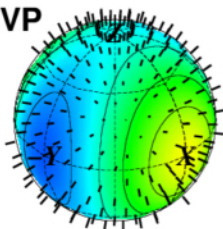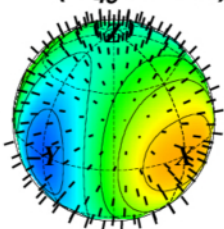

**$\Delta t$**

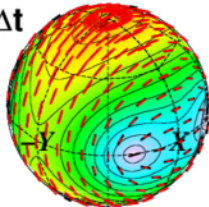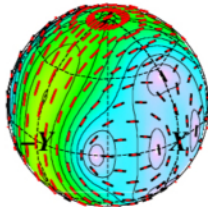

9.9 / 3.5 / 0.1 % \*\*

9.0 / 5.7 / 0.2 %

sec per km

**Cylindrical Fold**

Limb angle  $78^\circ$

**$A/L = 0.75$**

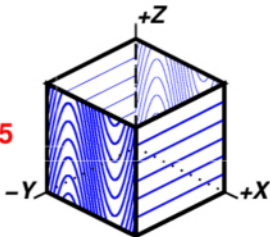

Orocopia Formation schist used as representative fabric.

\*\* Tensor symmetry decomposition percentages:

T.I. / orthorhombic / all lower symmetries.

**Elliptical T.I.**

**Full T.I.**

( $v_{45} = 28\%$ )

**VP**

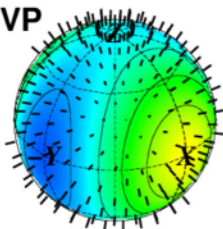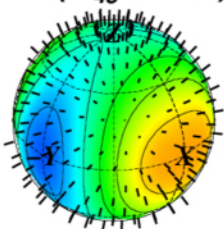

**$\Delta t$**

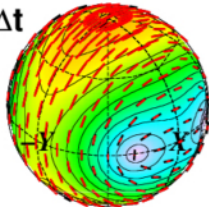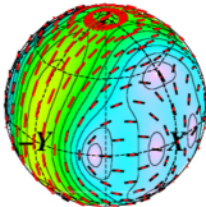

10.6 / 3.2 / 0.1 % \*\*

9.6 / 5.6 / 0.2 %

*sec per km*

**Cylindrical Fold**

**Limb angle 79°**

**A/L= 0.82**

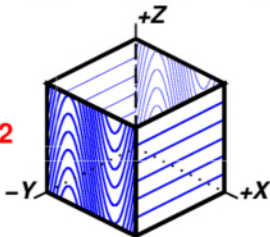

Orocopia Formation schist used as representative fabric.

\*\* Tensor symmetry decomposition percentages:

T.I. / orthorhombic / all lower symmetries.

**Elliptical T.I.**

**Full T.I.**

( $v_{45} = 28\%$ )

**VP**

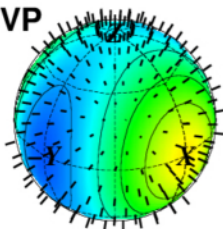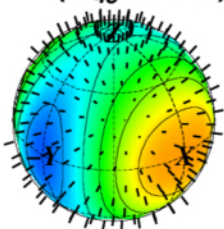

**$\Delta t$**

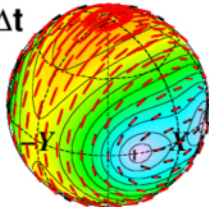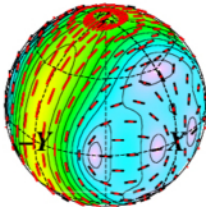

11.2 / 3.0 / 0.1 % \*\*

10.2 / 5.5 / 0.1 %

sec per km

**Cylindrical Fold**

Limb angle  $80^\circ$

**A/L = 0.90**

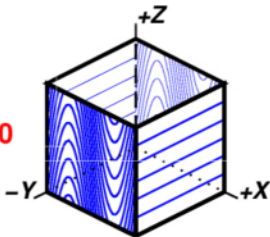

Orocopia Formation schist used as representative fabric.

\*\* Tensor symmetry decomposition percentages:

T.I. / orthorhombic / all lower symmetries.

**Elliptical T.I.**

**Full T.I.**

( $v_{45} = 28\%$ )

**VP**

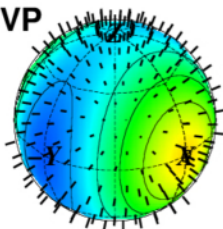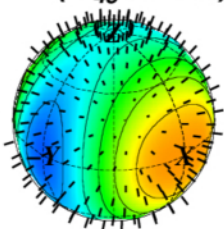

**$\Delta t$**

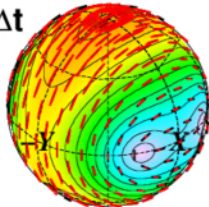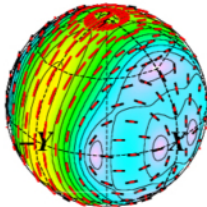

11.8 / 2.8 / 0.1 % \*\*

10.7 / 5.5 / 0.1 %

*sec per km*

**Cylindrical Fold**

Limb angle  $81^\circ$

**$A/L = 1.00$**

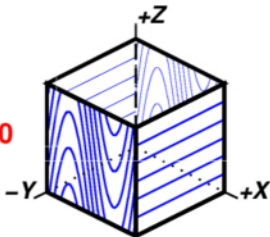

Orocopia Formation schist used as representative fabric.

\*\* Tensor symmetry decomposition percentages:

T.I. / orthorhombic / all lower symmetries.

**Elliptical T.I.**

**Full T.I.**

( $v_{45} = 28\%$ )

**VP**

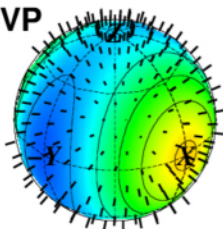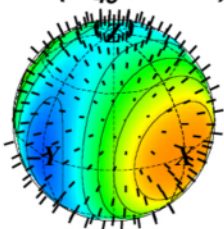

**$\Delta t$**

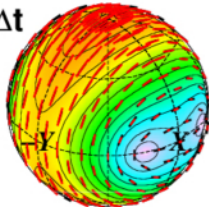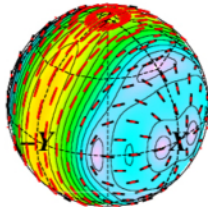

12.5 / 2.7 / 0.1 % \*\*

11.3 / 5.4 / 0.1 %

sec per km

**Cylindrical Fold**

Limb angle  $82^\circ$

**A/L = 1.13**

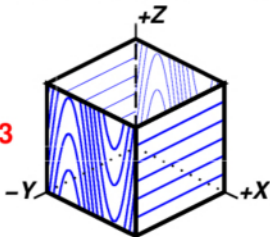

Orocopia Formation schist used as representative fabric.

\*\* Tensor symmetry decomposition percentages:

T.I. / orthorhombic / all lower symmetries.

**Elliptical T.I.**

**Full T.I.**

( $v_{45} = 28\%$ )

**VP**

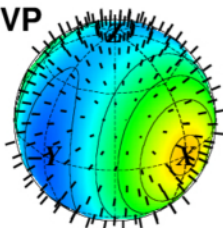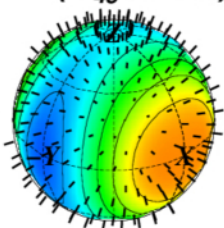

**$\Delta t$**

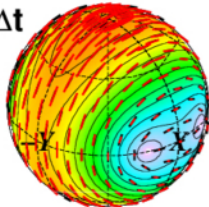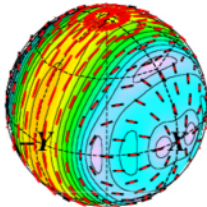

13.1 / 2.5 / 0.0 % \*\*

11.8 / 5.4 / 0.1 %

**sec per km**

**Cylindrical Fold**

**Limb angle  $83^\circ$**

**A/L = 1.30**

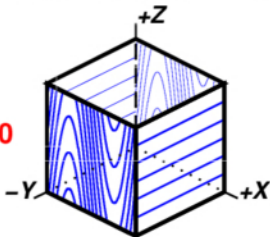

Orocopia Formation schist used as representative fabric.

\*\* Tensor symmetry decomposition percentages:

T.I. / orthorhombic / all lower symmetries.



***Elliptical T.I.***

***Full T.I.***

***( $v_{45} = 28\%$ )***

**VP**

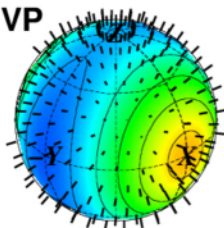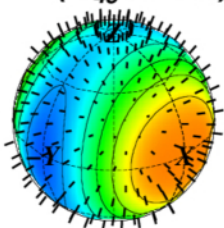

**$\Delta t$**

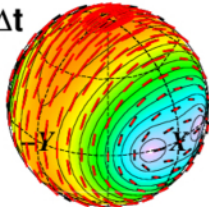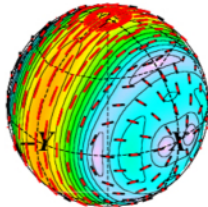

13.7 / 2.3 / 0.0 % \*\*

12.3 / 5.5 / 0.1 %

***sec per km***

**Cylindrical Fold**

**Limb angle  $84^\circ$**

**$A/L = 1.51$**

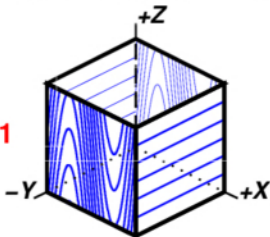

Orocopia Formation schist used as representative fabric.

\*\* Tensor symmetry decomposition percentages:

T.I. / orthorhombic / all lower symmetries.

**Elliptical T.I.**

**Full T.I.**

( $v_{45} = 28\%$ )

**VP**

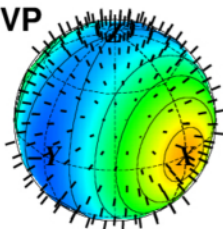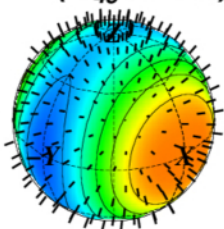

**$\Delta t$**

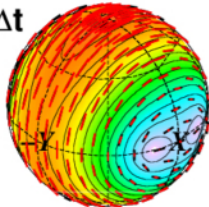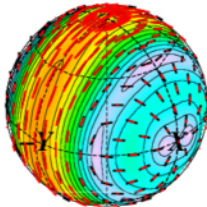

14.3 / 2.2 / 0.0 % \*\*

12.8 / 5.5 / 0.1 %

*sec per km*

**Cylindrical Fold**

Limb angle  $85^\circ$

**$A/L = 1.82$**

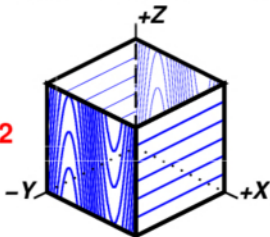

Orocopia Formation schist used as representative fabric.

\*\* Tensor symmetry decomposition percentages:

T.I. / orthorhombic / all lower symmetries.

**Elliptical T.I.**

**Full T.I.**

( $v_{45} = 28\%$ )

**VP**

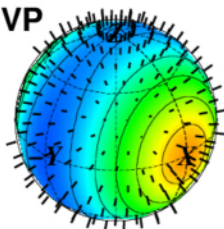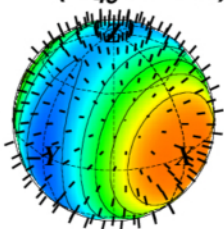

**$\Delta t$**

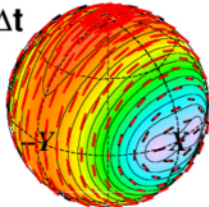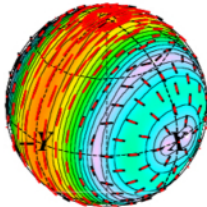

14.9 / 2.1 / 0.0% \*\*

13.2 / 5.6 / 0.0%

*sec per km*

**Cylindrical Fold**

Limb angle  $86^\circ$

**A/L = 2.28**

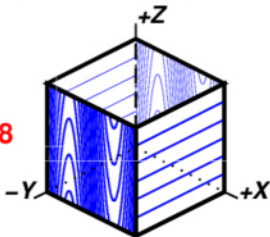

Orocopia Formation schist used as representative fabric.

\*\* Tensor symmetry decomposition percentages:

T.I. / orthorhombic / all lower symmetries.

***Elliptical T.I.***

***Full T.I.***

***( $v_{45} = 28\%$ )***

**VP**

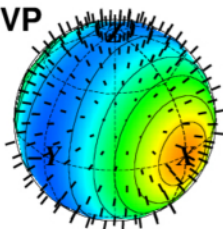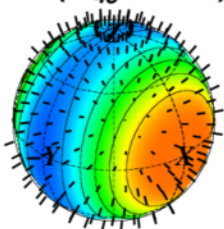

**$\Delta t$**

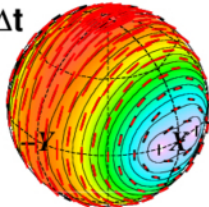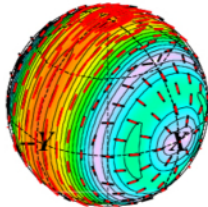

15.4 / 2.1 / 0.0% \*\*

13.7 / 5.7 / 0.0%

***sec per km***

**Cylindrical Fold**

**Limb angle  $87^\circ$**

**$A/L = 3.04$**

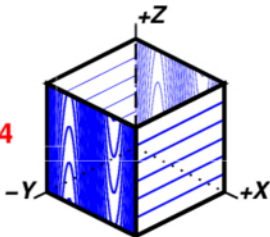

Orocopia Formation schist used as representative fabric.

\*\* Tensor symmetry decomposition percentages:

T.I. / orthorhombic / all lower symmetries.

**Elliptical T.I.**

**Full T.I.**

( $v_{45} = 28\%$ )

**VP**

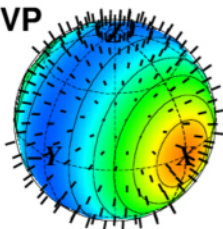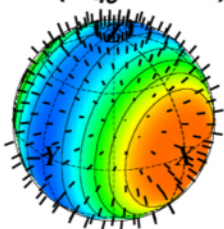

**$\Delta t$**

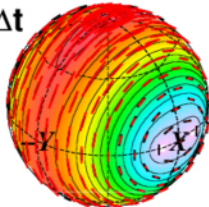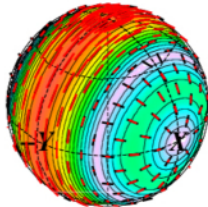

15.8 / 2.1 / 0.0% \*\*

14.1 / 5.9 / 0.0%

sec per km

**Cylindrical Fold**

Limb angle  $88^\circ$

**$A/L = 4.56$**

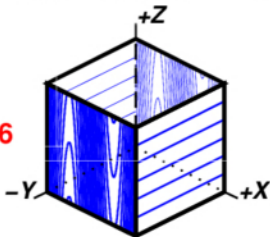

Orocopia Formation schist used as representative fabric.

\*\* Tensor symmetry decomposition percentages:

T.I. / orthorhombic / all lower symmetries.

**Elliptical T.I.**

**Full T.I.**

( $v_{45} = 28\%$ )

**VP**

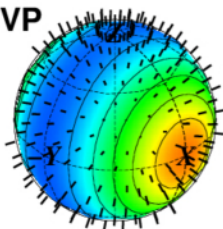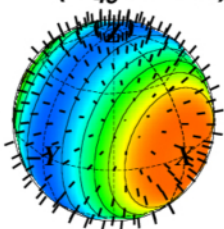

**$\Delta t$**

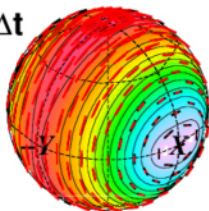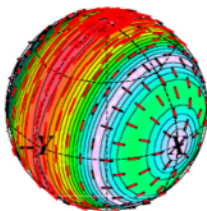

16.2 / 2.1 / 0.0% \*\*

14.4 / 6.0 / 0.0%

sec per km

**Cylindrical Fold**

Limb angle  $89^\circ$

**A/L = 9.12**

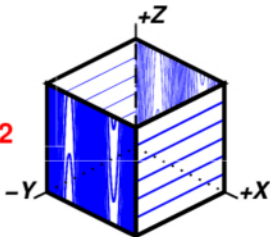

Orocopia Formation schist used as representative fabric.

\*\* Tensor symmetry decomposition percentages:

T.I. / orthorhombic / all lower symmetries.

**Elliptical T.I.**

**Full T.I.**

( $v_{45} = 28\%$ )

**VP**

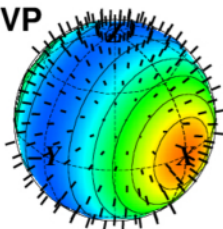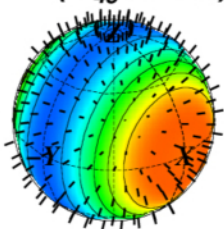

**$\Delta t$**

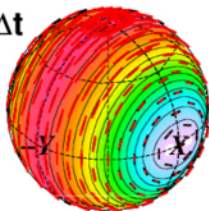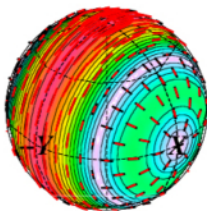

18.7 / 0.0 / 0.0% \*\*

22.2 / 0.0 / 0.0%

*sec per km*

**Cylindrical Fold**

Limb angle  $90^\circ$

**A/L= infinity**

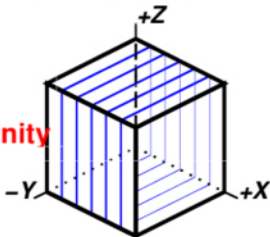

Orocopia Formation schist used as representative fabric.

\*\* Tensor symmetry decomposition percentages:

T.I. / orthorhombic / all lower symmetries.
