# Supplementary material
Source: publisher figshare collection journal article supplement (https://gsapubs.figshare.com/ndownloader/files/22411446)
Supplement: Supplementary file 2 [file 22411446]

Archive with 5 entries (5 files):
- 0_readme_Supplemental_Info.pdf
- 1_EMs_Tensors.xlsx
- 2_cylindrical_fold_SGA_0-90degrees.pdf
- 3A_rotation_matrix_21x21.pdf
- 3B_c21x1_rotation_code.f.txt
