# Supplementary material
Source: publisher figshare collection journal article supplement (https://gsapubs.figshare.com/ndownloader/files/22411446)
Supplement: Supplementary file 2 [file 22411446 › 1_EMs_Tensors.xlsx]

## Sheet: Sheet1
Supplemental File 2_EMs_Tensors.xlsx: Tables of effective media tensors (Pa) of structures used in this study (Figures 4, 7, and 9). Note that all numbers in tensors are initially displayed in exponential notation, but more details of values can be obtained by reformatting the spreadsheet columns or adjusting the format of the numbers.
		C*11	C*12	C*13	C*14	C*15	C*16
		--	C*22	C*23	C*24	C*25	C*26
C*	=	--	--	C*33	C*34	C*35	C*36
		--	--	--	C*44	C*45	C*46
		--	--	--	--	C*55	C*56
		--	--	--	--	--	C*66
Figure 4
Orocopia schist (density = 2815 kg/m3)
	C* (limb angle of 0°)								C* (limb angle of 30°)								C* (limb angle of 45°)								C* (limb angle of 60°)								C* (limb angle of 75°)								C* (limb angle of 90°)
		132670000000	40775000000	46372000000	0	0	0			124870000000	41532000000	45615000000	0	115400000	115400000			116410000000	42426000000	44721000000	0	117610000	117610000			106420000000	43587000000	43560000000	0	88303000	88303000			95842000000	44934000000	42213000000	0	45256000	45256000			85154000000	46372000000	46372000000	0	0	0
			132670000000	46372000000	0	0	0				132670000000	45615000000	0	-23993000	-23993000				132670000000	44721000000	0	-27704000	-27704000				132670000000	43560000000	0	-23993000	-23993000				132670000000	42213000000	0	-13852000	-13852000				132670000000	40775000000	0	0	0
	=			85154000000	0	0	0		=			90196000000	0	88303000	88303000		=			96924000000	0	117600000	117600000		=			106660000000	0	115400000	115400000		=			118940000000	0	72349000	72349000		=			132670000000	0	0	0
					28109000000	0	0						30520000000	0	76467000						33370000000	0	88297000						37072000000	0	76467000						41363000000	0	44148000						45945000000	0	0
						28109000000	0							29488000000	76467000							30353000000	88297000							30479000000	76467000							29628000000	44148000							28109000000	0
							45945000000								43535000000								40685000000								36983000000								32692000000								28109000000
Figure 7
Orocopia schist (density = 2815 kg/m3)
	C* (Figure 7A, shear zone)
		93802000000	45153000000	48065000000	0	6756800000	0
			132670000000	41993000000	0	-1756900000	0
	=			120630000000	0	8159600000	0
					42063000000	0	5599500000
						29803000000	0
							31992000000
	C* (Figure 7B, monocline)
		123780000000	41663000000	47716000000	0	7898500000	0
			132670000000	45484000000	0	-1631700000	0
	=			91347000000	0	5954200000	0
					30939000000	0	5200200000
						29454000000	0
							43116000000
	C* (Figure 7C, fold)
		116410000000	42426000000	44721000000	0	117610000	117610000
			132670000000	44721000000	0	-27704000	-27704000
	=			96924000000	0	117600000	117600000
					33370000000	0	88297000
						30353000000	88297000
							40685000000
	C* (Figure 7D, plunging fold)
		129930000000	42196000000	45733000000	-457.44	-1477400000	43.466
			121460000000	47743000000	367.32	307400000	-13.58
	=			94792000000	-291.94	-1013800000	19.446
					30573000000	12.245	-913410000
						32176000000	875.83
							41568000000
	C* (Figure 7E, dome)
		109470000000	47268000000	44365000000	-68.398	-304.01	-5.7218
			109470000000	44365000000	-30.993	83.618	20.076
	=			126580000000	-10.139	-480.05	0.37643
					36560000000	23.891	-348.83
						36559000000	-35.096
							31525000000
Figure 9
Set 1
Orocopia schist with elliptical TI (density = 2815 kg/m3)
	C* (limb angle of 0°)								C* (limb angle of 30°)								C* (limb angle of 45°)								C* (limb angle of 60°)								C* (limb angle of 75°)								C* (limb angle of 90°)
		132670000000	40775000000	46372000000	0	0	0			124870000000	41532000000	45615000000	0	115400000	115400000			116410000000	42426000000	44721000000	0	117610000	117610000			106420000000	43587000000	43560000000	0	88303000	88303000			95842000000	44934000000	42213000000	0	45256000	45256000			85154000000	46372000000	46372000000	0	0	0
			132670000000	46372000000	0	0	0				132670000000	45615000000	0	-23993000	-23993000				132670000000	44721000000	0	-27704000	-27704000				132670000000	43560000000	0	-23993000	-23993000				132670000000	42213000000	0	-13852000	-13852000				132670000000	40775000000	0	0	0
	=			85154000000	0	0	0		=			90196000000	0	88303000	88303000		=			96924000000	0	117600000	117600000		=			106660000000	0	115400000	115400000		=			118940000000	0	72349000	72349000		=			132670000000	0	0	0
					28109000000	0	0						30520000000	0	76467000						33370000000	0	88297000						37072000000	0	76467000						41363000000	0	44148000						45945000000	0	0
						28109000000	0							29488000000	76467000							30353000000	88297000							30479000000	76467000							29628000000	44148000							28109000000	0
							45945000000								43535000000								40685000000								36983000000								32692000000								28109000000
Central Ranges slate with elliptical TI (density = 2712 kg/m3)
	C* (limb angle of 0°)								C* (limb angle of 30°)								C* (limb angle of 45°)								C* (limb angle of 60°)								C* (limb angle of 75°)								C* (limb angle of 90°)
		124590000000	32121000000	48740000000	0	0	0			117500000000	34367000000	46494000000	0	105210000	105210000			109790000000	37023000000	43838000000	0	107840000	107840000			100630000000	40471000000	40389000000	0	81570000	81570000			90895000000	44470000000	36391000000	0	42099000	42099000			81027000000	48740000000	48740000000	0	0	0
			124590000000	48740000000	0	0	0				124590000000	46494000000	0	-71249000	-71249000				124590000000	43838000000	0	-82272000	-82272000				124590000000	40389000000	0	-71249000	-71249000				124590000000	36391000000	0	-41136000	-41136000				124590000000	32121000000	0	0	0
	=			81027000000	0	0	0		=			85711000000	0	81569000	81569000		=			91919000000	0	107840000	107840000		=			100850000000	0	105210000	105210000		=			112070000000	0	65739000	65739000		=			124590000000	0	0	0
					24278000000	0	0						27245000000	0	94140000						30754000000	0	108700000						35311000000	0	94140000						40594000000	0	54352000						46236000000	0	0
						24278000000	0							25480000000	94140000							26236000000	108700000							26346000000	94140000							25603000000	54352000							24278000000	0
							46236000000								43269000000								39760000000								35203000000								29919000000								24278000000
Nanga Parbat gneiss with elliptical TI (density = 2692 kg/m3)
	C* (limb angle of 0°)								C* (limb angle of 30°)								C* (limb angle of 45°)								C* (limb angle of 60°)								C* (limb angle of 75°)								C* (limb angle of 90°)
		94782000000	27060000000	24874000000	0	0	0			91029000000	26765000000	25170000000	0	56572000	56572000			86863000000	26415000000	25519000000	0	59753000	59753000			81808000000	25962000000	25973000000	0	46922000	46922000			76303000000	25436000000	26499000000	0	25052000	25052000			70642000000	24874000000	24874000000	0	0	0
			94782000000	24874000000	0	0	0				94782000000	25170000000	0	9370100	9370100				94782000000	25519000000	0	10820000	10820000				94782000000	25973000000	0	9370100	9370100				94782000000	26499000000	0	5409800	5409800				94782000000	27060000000	0	0	0
	=			70642000000	0	0	0		=			73413000000	0	46923000	46923000		=			76963000000	0	59753000	59753000		=			81928000000	0	56572000	56572000		=			88039000000	0	34701000	34701000		=			94782000000	0	0	0
					27793000000	0	0						28613000000	0	26013000						29583000000	0	30038000						30842000000	0	26013000						32302000000	0	15019000						33861000000	0	0
						27793000000	0							28284000000	26013000							28592000000	30038000							28637000000	26013000							28334000000	15019000							27793000000	0
							33861000000								33041000000								32071000000								30812000000								29352000000								27793000000
Set 2
Orocopia schist with full TI (density = 2815 kg/m3)
	C* (limb angle of 0°)								C* (limb angle of 30°)								C* (limb angle of 45°)								C* (limb angle of 60°)								C* (limb angle of 75°)								C* (limb angle of 90°)
		132670000000	40775000000	24765000000	0	0	0			120160000000	38612000000	26928000000	0	161710000	161710000			108740000000	36053000000	29487000000	0	117610000	117610000			98320000000	32730000000	32810000000	0	41985000	41985000			90649000000	28878000000	36662000000	0	-1061400	-1061400			85154000000	24765000000	24765000000	0	0	0
			132670000000	24765000000	0	0	0				132670000000	26928000000	0	68642000	68642000				132670000000	29487000000	0	79261000	79261000				132670000000	32810000000	0	68643000	68643000				132670000000	36662000000	0	39631000	39631000				132670000000	40775000000	0	0	0
	=			85154000000	0	0	0		=			85484000000	0	41985000	41985000		=			89253000000	0	117610000	117610000		=			98555000000	0	161710000	161710000		=			113750000000	0	118670000	118670000		=			132670000000	0	0	0
					28109000000	0	0						30520000000	0	76467000						33370000000	0	88297000						37072000000	0	76467000						41363000000	0	44148000						45945000000	0	0
						28109000000	0							34200000000	76467000							38023000000	88297000							38582000000	76467000							34821000000	44148000							28109000000	0
							45945000000								43535000000								40685000000								36983000000								32692000000								28109000000
Central Ranges slate with full TI (density = 2712 kg/m3)
	C* (limb angle of 0°)								C* (limb angle of 30°)								C* (limb angle of 45°)								C* (limb angle of 60°)								C* (limb angle of 75°)								C* (limb angle of 90°)
		124590000000	32121000000	30805000000	0	0	0			113590000000	31943000000	30983000000	0	143660000	143660000			103420000000	31733000000	31193000000	0	107840000	107840000			93909000000	31460000000	31466000000	0	43124000	43124000			86584000000	31143000000	31783000000	0	3652600	3652600			81027000000	30805000000	30805000000	0	0	0
			124590000000	30805000000	0	0	0				124590000000	30983000000	0	5641500	5641500				124590000000	31193000000	0	6514200	6514200				124590000000	31466000000	0	5641500	5641500				124590000000	31783000000	0	3257100	3257100				124590000000	32121000000	0	0	0
	=			81027000000	0	0	0		=			81800000000	0	43124000	43124000		=			85552000000	0	107840000	107840000		=			94124000000	0	143650000	143650000		=			107760000000	0	104180000	104180000		=			124590000000	0	0	0
					24278000000	0	0						27245000000	0	94140000						30754000000	0	108700000						35311000000	0	94140000						40594000000	0	54352000						46236000000	0	0
						24278000000	0							29392000000	94140000							32602000000	108700000							33071000000	94140000							29913000000	54352000							24278000000	0
							46236000000								43269000000								39760000000								35203000000								29919000000								24278000000
Nanga Parbat gneiss with full TI (density = 2692 kg/m3)
	C* (limb angle of 0°)								C* (limb angle of 30°)								C* (limb angle of 45°)								C* (limb angle of 60°)								C* (limb angle of 75°)								C* (limb angle of 90°)
		94782000000	27060000000	45574000000	0	0	0			95543000000	29562000000	43072000000	0	12199000	12199000			94212000000	32521000000	40114000000	0	59753000	59753000			89571000000	36363000000	36271000000	0	91295000	91295000			81278000000	40818000000	31817000000	0	69425000	69425000			70642000000	45574000000	45574000000	0	0	0
			94782000000	45574000000	0	0	0				94782000000	43072000000	0	-79375000	-79375000				94782000000	40114000000	0	-91655000	-91655000				94782000000	36271000000	0	-79376000	-79376000				94782000000	31817000000	0	-45827000	-45827000				94782000000	27060000000	0	0	0
	=			70642000000	0	0	0		=			77927000000	0	91295000	91295000		=			84312000000	0	59753000	59753000		=			89690000000	0	12199000	12199000		=			93014000000	0	-9671700	-9671700		=			94782000000	0	0	0
					27793000000	0	0						28613000000	0	26013000						29583000000	0	30038000						30842000000	0	26013000						32302000000	0	15019000						33861000000	0	0
						27793000000	0							23770000000	26013000							21244000000	30038000							20875000000	26013000							23360000000	15019000							27793000000	0
							33861000000								33041000000								32071000000								30812000000								29352000000								27793000000
Set 3
Orocopia schist with orthorhombic (density = 2815 kg/m3)
	C* (limb angle of 0°)								C* (limb angle of 30°)								C* (limb angle of 45°)								C* (limb angle of 60°)								C* (limb angle of 75°)								C* (limb angle of 90°)
		137540000000	38665000000	24413000000	0	0	0			123730000000	36739000000	26339000000	0	178460000	178460000			111130000000	34461000000	28617000000	0	129670000	129670000			99644000000	31504000000	31574000000	0	46138000	46138000			91196000000	28075000000	35003000000	0	-1325700	-1325700			85154000000	24413000000	24413000000	0	0	0
			127880000000	24413000000	0	0	0				127880000000	26339000000	0	61098000	61098000				127880000000	28617000000	0	70550000	70550000				127880000000	31574000000	0	61098000	61098000				127880000000	35003000000	0	35275000	35275000				127880000000	38665000000	0	0	0
	=			85154000000	0	0	0		=			85502000000	0	46138000	46138000		=			89648000000	0	129670000	129670000		=			99903000000	0	178460000	178460000		=			116660000000	0	131000000	131000000		=			137540000000	0	0	0
					28466000000	0	0						30828000000	0	74937000						33622000000	0	86530000						37249000000	0	74937000						41455000000	0	43265000						45945000000	0	0
						27755000000	0							34486000000	74937000							38712000000	86530000							39329000000	74937000							35172000000	43265000							27755000000	0
							45945000000								43583000000								40790000000								37163000000								32957000000								28466000000
Central Ranges slate with orthorhombic (density = 2712 kg/m3)
	C* (limb angle of 0°)								C* (limb angle of 30°)								C* (limb angle of 45°)								C* (limb angle of 60°)								C* (limb angle of 75°)								C* (limb angle of 90°)
		133120000000	26304000000	30333000000	0	0	0			119670000000	26848000000	29788000000	0	174690000	174690000			107310000000	27492000000	29144000000	0	128930000	128930000			95916000000	28328000000	28308000000	0	48628000	48628000			87343000000	29298000000	27339000000	0	1434200	1434200			81027000000	30333000000	30333000000	0	0	0
			116350000000	30333000000	0	0	0				116350000000	29788000000	0	-17271000	-17271000				116350000000	29144000000	0	-19943000	-19943000				116350000000	28308000000	0	-17272000	-17272000				116350000000	27339000000	0	-9971700	-9971700				116350000000	26304000000	0	0	0
	=			81027000000	0	0	0		=			81653000000	0	48627000	48627000		=			85951000000	0	128930000	128930000		=			96174000000	0	174690000	174690000		=			112670000000	0	127500000	127500000		=			133120000000	0	0	0
					25096000000	0	0						27953000000	0	90632000						31331000000	0	104650000						35718000000	0	90632000						40805000000	0	52326000						46236000000	0	0
						23457000000	0							29870000000	90632000							33896000000	104650000							34484000000	90632000							30524000000	52326000							23457000000	0
							46236000000								43379000000								40001000000								35614000000								30527000000								25096000000
