# Supplementary material
Source: publisher figshare collection journal article supplement (https://gsapubs.figshare.com/ndownloader/files/22411446)
Supplement: Supplementary file 2 [file 22411446 › 3A_rotation_matrix_21x21.pdf]

| 2                        | 3                                                 | 4                                                 | 5                                                                               | 6                                                                               | 7                                                                               | 8                        | 9                                                 | 10                                                                              | 11                                                                              | 12                                                                              | 13                       | 14                                                                              | 15                                                                              | 16                                                                                | 17                                                | 18                                                                                                     | 19                                                                                                     | 20                                                | 21                                                |
|--------------------------|---------------------------------------------------|---------------------------------------------------|---------------------------------------------------------------------------------|---------------------------------------------------------------------------------|---------------------------------------------------------------------------------|--------------------------|---------------------------------------------------|---------------------------------------------------------------------------------|---------------------------------------------------------------------------------|---------------------------------------------------------------------------------|--------------------------|---------------------------------------------------------------------------------|---------------------------------------------------------------------------------|-----------------------------------------------------------------------------------|---------------------------------------------------|--------------------------------------------------------------------------------------------------------|--------------------------------------------------------------------------------------------------------|---------------------------------------------------|---------------------------------------------------|
| $a_{11}^4$               | $2 a_{11}^2 a_{12}^2$                             | $2 a_{11}^2 a_{13}^2$                             | $4 a_{11}^2 a_{12} a_{13}$                                                      | $4 a_{11}^3 a_{13}$                                                             | $4 a_{11}^3 a_{12}$                                                             | $a_{12}^4$               | $2 a_{12}^2 a_{13}^2$                             | $4 a_{12}^3 a_{13}$                                                             | $4 a_{11} a_{12}^2 a_{13}$                                                      | $4 a_{11} a_{12}^3$                                                             | $a_{13}^4$               | $4 a_{12} a_{13}^3$                                                             | $4 a_{11} a_{12} a_{13}^2$                                                      | $4 a_{12}^2 a_{13}^2$                                                             | $8 a_{11} a_{12} a_{13}^2$                        | $8 a_{11} a_{12}^2 a_{13}$                                                                             | $4 a_{11}^2 a_{13}^2$                                                                                  | $8 a_{11}^2 a_{12} a_{13}$                        | $4 a_{11}^2 a_{12}^2$                             |
| $a_{11}^2 a_{21}^2$      | $a_{12}^2 a_{21}^2 + a_{11}^2 a_{22}^2$           | $a_{13}^2 a_{21}^2 + a_{11}^2 a_{23}^2$           | $2 (a_{12} a_{13} a_{21}^2 + a_{11}^2 a_{22} a_{23})$                           | $2 a_{11} a_{21} (a_{13} a_{21} + a_{11} a_{23})$                               | $2 a_{11} a_{21} (a_{12} a_{21} + a_{11} a_{22})$                               | $a_{12}^2 a_{22}^2$      | $a_{13}^2 a_{22}^2 + a_{12}^2 a_{23}^2$           | $2 a_{12} a_{22} (a_{13} a_{22} + a_{12} a_{23})$                               | $2 (a_{11} a_{13} a_{22}^2 + a_{11}^2 a_{21} a_{23})$                           | $2 a_{12} a_{22} (a_{12} a_{21} + a_{11} a_{22})$                               | $a_{13}^2 a_{23}^2$      | $2 a_{13} a_{23} (a_{13} a_{22} + a_{12} a_{23})$                               | $2 a_{13} a_{23} (a_{13} a_{21} + a_{11} a_{23})$                               | $2 (a_{13}^2 a_{21} a_{22} + a_{11} a_{12} a_{23}^2)$                             | $4 a_{12} a_{13} a_{22} a_{23}$                   | $4 a_{13} (a_{12} a_{21} + a_{11} a_{22}) a_{23}$                                                      | $4 a_{12} a_{22} (a_{13} a_{21} + a_{11} a_{23})$                                                      | $4 a_{11} a_{13} a_{21} a_{23}$                   | $4 a_{11} a_{12} a_{21} a_{22}$                   |
| $a_{11}^2 a_{31}^2$      | $a_{12}^2 a_{31}^2 + a_{11}^2 a_{32}^2$           | $a_{13}^2 a_{31}^2 + a_{11}^2 a_{33}^2$           | $2 (a_{12} a_{13} a_{31}^2 + a_{11}^2 a_{32} a_{33})$                           | $2 a_{11} a_{31} (a_{13} a_{31} + a_{11} a_{33})$                               | $2 a_{11} a_{31} (a_{12} a_{31} + a_{11} a_{32})$                               | $a_{12}^2 a_{32}^2$      | $a_{13}^2 a_{32}^2 + a_{12}^2 a_{33}^2$           | $2 a_{12} a_{32} (a_{13} a_{32} + a_{12} a_{33})$                               | $2 (a_{11} a_{13} a_{32}^2 + a_{12}^2 a_{31} a_{33})$                           | $2 a_{12} a_{32} (a_{12} a_{31} + a_{11} a_{32})$                               | $a_{13}^2 a_{33}^2$      | $2 a_{13} a_{33} (a_{13} a_{32} + a_{12} a_{33})$                               | $2 a_{13} a_{33} (a_{13} a_{31} + a_{11} a_{33})$                               | $2 (a_{13}^2 a_{31} a_{32} + a_{11} a_{12} a_{33}^2)$                             | $4 a_{12} a_{13} a_{32} a_{33}$                   | $4 a_{13} (a_{12} a_{31} + a_{11} a_{32}) a_{33}$                                                      | $4 a_{12} a_{32} (a_{13} a_{31} + a_{11} a_{33})$                                                      | $4 a_{11} a_{13} a_{31} a_{33}$                   | $4 a_{11} a_{12} a_{31} a_{32}$                   |
| $a_{11}^2 a_{21} a_{31}$ | $a_{12}^2 a_{21} a_{31} + a_{11}^2 a_{22} a_{32}$ | $a_{13}^2 a_{21} a_{31} + a_{11}^2 a_{23} a_{33}$ | $2 a_{12} a_{13} a_{21} a_{31} + a_{11}^2 (a_{23} a_{32} + a_{22} a_{33})$      | $a_{11} (2 a_{13} a_{21} a_{31} + a_{11} a_{23} a_{31} + a_{11} a_{21} a_{33})$ | $a_{11} (2 a_{12} a_{21} a_{31} + a_{11} a_{22} a_{31} + a_{11} a_{21} a_{32})$ | $a_{12}^2 a_{22} a_{32}$ | $a_{13}^2 a_{22} a_{32} + a_{12}^2 a_{23} a_{33}$ | $a_{12} (2 a_{13} a_{22} a_{32} + a_{12} a_{23} a_{32} + a_{12} a_{22} a_{33})$ | $2 a_{11} a_{13} a_{22} a_{32} + a_{12}^2 (a_{23} a_{31} + a_{21} a_{33})$      | $a_{12} (a_{12} a_{22} a_{31} + a_{12} a_{21} a_{32} + 2 a_{11} a_{22} a_{32})$ | $a_{13}^2 a_{23} a_{33}$ | $a_{13} (a_{13} a_{23} a_{32} + a_{13} a_{22} a_{33} + 2 a_{12} a_{23} a_{33})$ | $a_{13} (a_{13} a_{23} a_{31} + a_{13} a_{21} a_{33} + 2 a_{11} a_{23} a_{33})$ | $a_{13}^2 (a_{22} a_{31} + a_{21} a_{32}) + 2 a_{11} a_{12} a_{23} a_{33}$        | $2 a_{12} a_{13} (a_{23} a_{32} + a_{22} a_{33})$ | $2 a_{13} (a_{12} a_{23} a_{31} + a_{11} a_{23} a_{32} + a_{12} a_{21} a_{33} + a_{11} a_{22} a_{33})$ | $2 a_{12} (a_{13} a_{22} a_{31} + a_{13} a_{21} a_{32} + a_{11} a_{23} a_{32} + a_{11} a_{22} a_{33})$ | $2 a_{11} a_{13} (a_{23} a_{31} + a_{21} a_{33})$ | $2 a_{11} a_{12} (a_{22} a_{31} + a_{21} a_{32})$ |
| $a_{11}^3 a_{31}$        | $a_{11} a_{12} (a_{12} a_{31} + a_{11} a_{32})$   | $a_{11} a_{13} (a_{13} a_{31} + a_{11} a_{33})$   | $a_{11} (2 a_{12} a_{13} a_{31} + a_{11} a_{13} a_{32} + a_{11} a_{12} a_{33})$ | $a_{11}^2 (3 a_{13} a_{31} + a_{11} a_{33})$                                    | $a_{11}^2 (3 a_{12} a_{31} + a_{11} a_{32})$                                    | $a_{12}^3 a_{32}$        | $a_{12} a_{13} (a_{13} a_{32} + a_{12} a_{33})$   | $a_{12}^2 (3 a_{13} a_{32} + a_{12} a_{33})$                                    | $a_{12} (a_{12} a_{13} a_{31} + 2 a_{11} a_{13} a_{32} + a_{11} a_{12} a_{33})$ | $a_{12}^2 (a_{12} a_{31} + 3 a_{11} a_{32})$                                    | $a_{13}^3 a_{33}$        | $a_{13}^2 (a_{13} a_{32} + 3 a_{12} a_{33})$                                    | $a_{13}^2 (a_{13} a_{31} + 3 a_{11} a_{33})$                                    | $a_{13} (a_{12} a_{13} a_{31} + a_{11} a_{13} a_{32} + 2 a_{11} a_{12} a_{33})$   | $2 a_{12} a_{13} (a_{13} a_{32} + a_{12} a_{33})$ | $2 a_{13} (a_{12} a_{13} a_{31} + a_{11} a_{13} a_{32} + a_{11} a_{12} a_{33})$                        | $2 a_{12} (a_{12} a_{13} a_{31} + 2 a_{11} a_{13} a_{32} + a_{11} a_{12} a_{33})$                      | $2 a_{11} a_{13} (a_{13} a_{31} + a_{11} a_{33})$ | $2 a_{11} a_{12} (a_{12} a_{31} + a_{11} a_{32})$ |
| $a_{11}^3 a_{21}$        | $a_{11} a_{12} (a_{12} a_{21} + a_{11} a_{22})$   | $a_{11} a_{13} (a_{13} a_{21} + a_{11} a_{23})$   | $a_{11} (2 a_{12} a_{13} a_{21} + a_{11} a_{13} a_{22} + a_{11} a_{12} a_{23})$ | $a_{11}^2 (3 a_{13} a_{21} + a_{11} a_{23})$                                    | $a_{11}^2 (3 a_{12} a_{21} + a_{11} a_{22})$                                    | $a_{12}^3 a_{22}$        | $a_{12} a_{13} (a_{13} a_{22} + a_{12} a_{23})$   | $a_{12}^2 (3 a_{13} a_{22} + a_{12} a_{23})$                                    | $a_{12} (a_{12} a_{13} a_{21} + 2 a_{11} a_{13} a_{22} + a_{11} a_{12} a_{23})$ | $a_{12}^2 (a_{12} a_{21} + 3 a_{11} a_{22})$                                    | $a_{13}^3 a_{23}$        | $a_{13}^2 (a_{13} a_{22} + 3 a_{12} a_{23})$                                    | $a_{13}^2 (a_{13} a_{21} + 3 a_{11} a_{23})$                                    | $a_{13} (a_{12} a_{13} a_{21} + a_{11} a_{13} a_{22} + 2 a_{11} a_{12} a_{23})$   | $2 a_{12} a_{13} (a_{13} a_{22} + a_{12} a_{23})$ | $2 a_{13} (a_{12} a_{13} a_{21} + a_{11} a_{13} a_{22} + a_{11} a_{12} a_{23})$                        | $2 a_{12} (a_{12} a_{13} a_{21} + 2 a_{11} a_{13} a_{22} + a_{11} a_{12} a_{23})$                      | $2 a_{11} a_{13} (a_{13} a_{21} + a_{11} a_{23})$ | $2 a_{11} a_{12} (a_{12} a_{21} + a_{11} a_{22})$ |
| $a_{21}^4$               | $2 a_{21}^2 a_{22}^2$                             | $2 a_{21}^2 a_{23}^2$                             | $4 a_{21}^2 a_{22} a_{23}$                                                      | $4 a_{21}^3 a_{23}$                                                             | $4 a_{21}^3 a_{22}$                                                             | $a_{22}^4$               | $2 a_{22}^2 a_{23}^2$                             | $4 a_{22}^3 a_{23}$                                                             | $4 a_{21} a_{22}^2 a_{23}$                                                      | $4 a_{21} a_{22}^3$                                                             | $a_{23}^4$               | $4 a_{22} a_{23}^3$                                                             | $4 a_{21} a_{22} a_{23}^2$                                                      | $4 a_{21}^2 a_{23}^2$                                                             | $8 a_{21} a_{22} a_{23}^2$                        | $8 a_{21} a_{22}^2 a_{23}$                                                                             | $4 a_{21}^2 a_{23}^2$                                                                                  | $8 a_{21}^2 a_{22} a_{23}$                        | $4 a_{21}^2 a_{22}^2$                             |
| $a_{21}^2 a_{31}^2$      | $a_{22}^2 a_{31}^2 + a_{21}^2 a_{32}^2$           | $a_{23}^2 a_{31}^2 + a_{21}^2 a_{33}^2$           | $2 (a_{22} a_{23} a_{31}^2 + a_{21}^2 a_{32} a_{33})$                           | $2 a_{21} a_{31} (a_{23} a_{31} + a_{21} a_{33})$                               | $2 a_{21} a_{31} (a_{22} a_{31} + a_{21} a_{32})$                               | $a_{22}^2 a_{32}^2$      | $a_{23}^2 a_{32}^2 + a_{22}^2 a_{33}^2$           | $2 a_{22} a_{32} (a_{23} a_{32} + a_{22} a_{33})$                               | $2 (a_{21} a_{23} a_{32}^2 + a_{22}^2 a_{31} a_{33})$                           | $2 a_{22} a_{32} (a_{22} a_{31} + a_{21} a_{32})$                               | $a_{23}^2 a_{33}^2$      | $2 a_{23} a_{33} (a_{23} a_{32} + a_{21} a_{33})$                               | $2 a_{23} a_{33} (a_{23} a_{31} + a_{21} a_{33})$                               | $2 (a_{23}^2 a_{31} a_{32} + a_{21} a_{22} a_{33}^2)$                             | $4 a_{22} a_{23} a_{32} a_{33}$                   | $4 a_{23} (a_{22} a_{31} + a_{21} a_{32}) a_{33}$                                                      | $4 a_{21} a_{23} a_{31} a_{33}$                                                                        | $4 a_{21} a_{22} a_{31} a_{32}$                   |                                                   |
| $a_{21}^3 a_{31}$        | $a_{21} a_{22} (a_{22} a_{31} + a_{21} a_{32})$   | $a_{21} a_{23} (a_{23} a_{31} + a_{21} a_{33})$   | $a_{21} (2 a_{22} a_{23} a_{31} + a_{21} a_{23} a_{32} + a_{21} a_{22} a_{33})$ | $a_{21}^2 (3 a_{22} a_{31} + a_{21} a_{33})$                                    | $a_{21}^2 (3 a_{22} a_{31} + a_{21} a_{32})$                                    | $a_{22}^3 a_{32}$        | $a_{22} a_{23} (a_{23} a_{32} + a_{22} a_{33})$   | $a_{22}^2 (a_{22} a_{32} + a_{22} a_{33})$                                      | $a_{22} (a_{22} a_{23} a_{31} + 2 a_{21} a_{23} a_{32} + a_{21} a_{22} a_{33})$ | $a_{22}^2 (a_{22} a_{31} + 3 a_{21} a_{32})$                                    | $a_{23}^3 a_{33}$        | $a_{23}^2 (a_{23} a_{32} + 3 a_{21} a_{33})$                                    | $a_{23}^2 (a_{23} a_{31} + 3 a_{11} a_{33})$                                    | $a_{23} (a_{22} a_{23} a_{31} + a_{21} a_{23} a_{32} + 2 a_{21} a_{22} a_{33})$   | $2 a_{22} a_{23} (a_{23} a_{32} + a_{22} a_{33})$ | $2 a_{23} (a_{22} a_{23} a_{31} + a_{21} a_{23} a_{32} + a_{21} a_{22} a_{33})$                        | $2 a_{22} (a_{22} a_{23} a_{31} + 2 a_{21} a_{23} a_{32} + a_{21} a_{22} a_{33})$                      | $2 a_{21} a_{22} (a_{22} a_{31} + a_{21} a_{32})$ | $2 a_{21} a_{22} (a_{22} a_{31} + a_{21} a_{32})$ |
| $a_{11} a_{21}^2 a_{31}$ | $a_{11} a_{22}^2 a_{31} + a_{12} a_{21}^2 a_{32}$ | $a_{11} a_{23}^2 a_{31} + a_{13} a_{21}^2 a_{33}$ | $2 a_{11} a_{22} a_{31} + a_{12} a_{21}^2 a_{32} + a_{13} a_{21}^2 a_{33}$      | $a_{21} (a_{13} a_{21} a_{31} + 2 a_{11} a_{23} a_{31} + a_{11} a_{21} a_{33})$ | $a_{21} (a_{12} a_{21} a_{31} + 2 a_{11} a_{22} a_{31} + a_{11} a_{21} a_{32})$ | $a_{12} a_{22}^2 a_{32}$ | $a_{12} a_{23}^2 a_{32} + a_{13} a_{22}^2 a_{33}$ | $a_{12} (a_{13} a_{22} a_{32} + 2 a_{12} a_{23} a_{32} + a_{12} a_{22} a_{33})$ | $2 a_{12} a_{21} a_{22} a_{32} + a_{22}^2 (a_{13} a_{31} + a_{11} a_{33})$      | $a_{12} (a_{12} a_{22} a_{31} + 2 a_{12} a_{21} a_{32} + a_{11} a_{22} a_{32})$ | $a_{13} a_{23}^2 a_{33}$ | $a_{13} (a_{13} a_{23} a_{32} + 2 a_{13} a_{22} a_{33} + a_{12} a_{23} a_{33})$ | $a_{13} (a_{13} a_{23} a_{31} + a_{13} a_{21} a_{33} + a_{11} a_{23} a_{33})$   | $a_{13}^2 (a_{13} a_{22} a_{31} + a_{11} a_{13} a_{32} + 2 a_{11} a_{12} a_{33})$ | $2 a_{12} a_{13} (a_{13} a_{32} + a_{12} a_{33})$ | $2 a_{13} (a_{12} a_{23} a_{31} + a_{11} a_{23} a_{32} + a_{11} a_{22} a_{33})$                        | $2 a_{22} (a_{12} a_{23} a_{31} + a_{12} a_{21} a_{32} + a_{11} a_{23} a_{32} + a_{11} a_{22} a_{33})$ | $2 a_{21} a_{22} (a_{12} a_{31} + a_{11} a_{32})$ | $2 a_{21} a_{22} (a_{12} a_{31} + a_{11} a_{32})$ |
| $a_{11} a_{21}^2 a_{21}$ | $a_{21} a_{22} (a_{12} a_{21} + a_{11} a_{22})$   | $a_{21} a_{23} (a_{13} a_{21} + a_{11} a_{23})$   | $a_{21} (a_{13} a_{21} a_{22} + a_{12} a_{21} a_{23} + 2 a_{11} a_{22} a_{23})$ | $a_{21}^2 (a_{13} a_{21} + 3 a_{11} a_{23})$                                    | $a_{21}^2 (a_{12} a_{21} + 3 a_{11} a_{22})$                                    | $a_{12} a_{22}^2 a_{22}$ | $a_{22} a_{23} (a_{13} a_{22} + a_{12} a_{23})$   | $a_{22}^2 (a_{13} a_{22} + 3 a_{12} a_{23})$                                    | $a_{22} (a_{13} a_{21} a_{22} + 2 a_{12} a_{21} a_{23} + a_{11} a_{22} a_{23})$ | $a_{22}^2 (3 a_{12} a_{21} + a_{11} a_{22})$                                    | $a_{13} a_{23}^3$        | $a_{23}^2 (3 a_{13} a_{22} + a_{12} a_{23})$                                    | $a_{23}^2 (3 a_{13} a_{21} + a_{11} a_{23})$                                    | $a_{23} (2 a_{13} a_{21} a_{22} + a_{12} a_{21} a_{23} + a_{11} a_{22} a_{23})$   | $2 a_{22} a_{23} (a_{13} a_{22} + a_{12} a_{23})$ | $2 a_{23} (2 a_{13} a_{21} a_{22} + a_{12} a_{21} a_{23} + a_{11} a_{22} a_{23})$                      | $2 a_{22} (a_{13} a_{21} a_{22} + a_{12} a_{21} a_{23} + a_{11} a_{22} a_{23})$                        | $2 a_{21} a_{22} (a_{13} a_{21} + a_{11} a_{23})$ | $2 a_{21} a_{22} (a_{12} a_{21} + a_{11} a_{22})$ |
| $a_{31}^4$               | $2 a_{31}^2 a_{32}^2$                             | $2 a_{31}^2 a_{33}^2$                             | $4 a_{31}^2 a_{32} a_{33}$                                                      | $4 a_{31}^3 a_{33}$                                                             | $4 a_{31}^3 a_{32}$                                                             | $a_{32}^4$               | $2 a_{32}^2 a_{33}^2$                             | $4 a_{32}^3 a_{33}$                                                             | $4 a_{31} a_{32}^2 a_{33}$                                                      | $4 a_{31} a_{32}^3$                                                             | $a_{33}^4$               | $4 a_{32} a_{33}^3$                                                             | $4 a_{31} a_{32} a_{33}^2$                                                      | $4 a_{31}^2 a_{33}^2$                                                             | $8 a_{31} a_{32} a_{33}^2$                        | $8 a_{31} a_{32}^2 a_{33}$                                                                             | $4 a_{31}^2 a_{33}^2$                                                                                  | $8 a_{31}^2 a_{32} a_{33}$                        | $4 a_{31}^2 a_{32}^2$                             |
| $a_{21} a_{31}^3$        | $a_{31} a_{32} (a_{22} a_{31} + a_{21} a_{32})$   | $a_{31} a_{33} (a_{23} a_{31} + a_{21} a_{33})$   | $a_{31} (a_{23} a_{31} a_{32} + a_{22} a_{31} a_{33} + 2 a_{21} a_{32} a_{33})$ | $a_{31}^2 (a_{23} a_{31} + 3 a_{21} a_{33})$                                    | $a_{31}^2 (a_{22} a_{31} + 3 a_{21} a_{32})$                                    | $a_{22} a_{32}^3$        | $a_{32} a_{33} (a_{23} a_{32} + a_{22} a_{33})$   | $a_{32}^2 (a_{23} a_{32} + 3 a_{22} a_{33})$                                    | $a_{32} (a_{23} a_{31} a_{32} + 2 a_{22} a_{31} a_{33} + a_{21} a_{32} a_{33})$ | $a_{32}^2 (3 a_{22} a_{31} + a_{21} a_{32})$                                    | $a_{23} a_{33}^3$        | $a_{33}^2 (3 a_{23} a_{32} + a_{22} a_{33})$                                    | $a_{33}^2 (3 a_{23} a_{31} + a_{21} a_{33})$                                    | $a_{33} (2 a_{23} a_{31} a_{32} + a_{22} a_{31} a_{33} + a_{21} a_{32} a_{33})$   | $2 a_{32} a_{33} (a_{23} a_{32} + a_{22} a_{33})$ | $2 a_{33} (2 a_{23} a_{31} a_{32} + a_{22} a_{31} a_{33} + a_{21} a_{32} a_{33})$                      | $2 a_{32} (a_{23} a_{31} a_{32} + 2 a_{22} a_{31} a_{33} + a_{21} a_{32} a_{33})$                      | $2 a_{31} a_{33} (a_{23} a_{31} + a_{21} a_{33})$ | $2 a_{31} a_{32} (a_{22} a_{31} + a_{21} a_{32})$ |
| $a_{11} a_{31}^3$        | $a_{31} a_{32} (a_{12} a_{31} + a_{11} a_{32})$   | $a_{31} a_{33} (a_{13} a_{31} + a_{11} a_{33})$   | $a_{31} (a_{13} a_{31} a_{32} + a_{12} a_{31} a_{33} + 2 a_{11} a_{32} a_{33})$ | $a_{31}^2 (a_{13} a_{31} + 3 a_{11} a_{33})$                                    | $a_{31}^2 (a_{12} a_{31} + 3 a_{11} a_{32})$                                    | $a_{12} a_{32}^3$        | $a_{32} a_{33} (a_{13} a_{32} + a_{12} a_{33})$   | $a_{32}^2 (a_{13} a_{32} + 3 a_{12} a_{33})$                                    | $a_{32} (a_{13} a_{31} a_{32} + 2 a_{12} a_{31} a_{33} + a_{11} a_{32} a_{33})$ | $a_{32}^2 (3 a_{12} a_{31} + a_{11} a_{32})$                                    | $a_{13} a_{33}^3$        | $a_{33}^2 (3 a_{13} a_{32} + a_{12} a_{33})$                                    | $a_{33}^2 (3 a_{13} a_{31} + a_{11} a_{33})$                                    | $a_{33} (2 a_{13} a_{31} a_{32} + a_{12} a_{31} a_{33} + a_{11} a_{32} a_{33})$   | $2 a_{32} a_{33} (a_{13} a_{32} + a_{12} a_{33})$ | $2 a_{33} (2 a_{13} a_{31} a_{32} + a_{12} a_{31} a_{33} + a_{11} a_{32} a_{33})$                      | $2 a_{32} (a_{13} a_{31} a_{32} + 2 a_{12} a_{31} a_{33} + a_{11} a_{32} a_{33})$                      | $2 a_{31} a_{33} (a_{13} a_{31} + a_{11} a_{33})$ | $2 a_{31} a_{32} (a_{12} a_{31} + a_{11} a_{32})$ |
| $a_{11} a_{21} a_{31}^2$ | $a_{12} a_{22} a_{31}^2 + a_{11} a_{21} a_{32}^2$ | $a_{13} a_{23} a_{31}^2 + a_{11} a_{21} a_{33}^2$ | $(a_{13} a_{22} + a_{12} a_{23}) a_{31}^2 + 2 a_{11} a_{21} a_{32} a_{33}$      | $a_{31} (a_{13} a_{21} a_{31} + a_{11} a_{23} a_{31} + 2 a_{11} a_{21} a_{33})$ | $a_{31} (a_{12} a_{21} a_{31} + a_{11} a_{22} a_{31} + 2 a_{11} a_{21} a_{32})$ | $a_{12} a_{22} a_{32}^2$ | $a_{13} a_{23} a_{32}^2 + a_{12} a_{22} a_{33}^2$ | $a_{32} (a_{13} a_{22} a_{32} + a_{12} a_{23} a_{32} + 2 a_{12} a_{22} a_{33})$ | $(a_{13} a_{21} + a_{11} a_{23}) a_{32}^2 + 2 a_{12} a_{22} a_{31} a_{33}$      | $a_{32} (2 a_{12} a_{22} a_{31} + a_{12} a_{21} a_{32} + a_{11} a_{22} a_{32})$ | $a_{13} a_{23} a_{33}^2$ | $a_{33} (2 a_{13} a_{23} a_{32} + a_{13} a_{22} a_{33} + a_{12} a_{23} a_{33})$ | $a_{33} (2 a_{13} a_{23} a_{31} + a_{13} a_{21} a_{33} + a_{11} a_{23} a_{33})$ | $2 a_{13} a_{23} a_{31} a_{32} + (a_{12} a_{21} + a_{11} a_{22}) a_{33}^2$        | $2 (a_{13} a_{22} + a_{12} a_{23}) a_{32} a_{33}$ | $2 (a_{13} a_{22} a_{31} + a_{12} a_{23} a_{31} + a_{13} a_{21} a_{32} + a_{11} a_{23} a_{32}) a_{33}$ | $2 a_{32} (a_{13} a_{22} a_{31} + a_{12} a_{23} a_{31} + a_{12} a_{21} a_{33} + a_{11} a_{22} a_{33})$ | $2 a_{31} a_{33} (a_{13} a_{31} + a_{11} a_{33})$ | $2 a_{31} a_{32} (a_{12} a_{31} + a_{11} a_{32})$ |
| $a_{21}^2 a_{31}^2$      | $2 a_{21} a_{22} a_{31} a_{32}$                   | $2 a_{21} a_{23} a_{31} a_{33}$                   | $2 a_{21} a_{23} a_{31} a_{33}$                                                 | $2 a_{21} a_{31} (a_{23} a_{32} + a_{22} a_{33})$                               | $2 a_{21} a_{31} (a_{22} a_{31} + a_{21} a_{32})$                               | $a_{22}^2 a_{32}^2$      | $2 a_{22} a_{23} a_{32} a_{33}$                   | $2 a_{22} a_{32} (a_{23} a_{32} + a_{22} a_{33})$                               | $2 a_{22} a_{32} (a_{23} a_{31} + a_{21} a_{33})$                               | $2 a_{22} a_{32} (a_{22} a_{31} + a_{21} a_{32})$                               | $a_{23}^2 a_{33}^2$      | $2 a_{23} a_{33} (a_{23} a_{32} + a_{22} a_{33})$                               |                                                                                 |                                                                                   |                                                   |                                                                                                        |                                                                                                        |                                                   |                                                   |
