# Supplementary material
Source: publisher figshare collection journal article supplement (https://gsapubs.figshare.com/ndownloader/files/22411446)
Supplement: Supplementary file 2 [file 22411446 › 3B_c21x1_rotation_code.f.txt]

c subroutines to define and rotate elastic stiffness using 21x1 vector notation.
c
c---------------------------------------------------------------------------
c Rotation matrix using 21x1 tensor notation and matrix multiplication.
c	R_21x1   = ROTMAT_21x21  * C_21x1	C = original elastic tensor.
c 	R[21,1]  = ROTMAT[21,21] * C[21,1]	R = rotated  elastic tensor.
c
c where	elastic tensors use these elements from 6x6 Voigt reduced notation 
c in order to form 21x1 array.
c         | 1|       21-element indices:         Voigt 6x6 ij indices:
c         | 2|      | 1   2  3  4  5  6 |     | 11 12 13 14 15 16 |
c         | 3|      |     7  8  9 10 11 |     |    22 23 24 25 26 |
c  C_21x1 | :|   =  |       12 13 14 15 |  =  |       33 34 35 36 |
c         | :|      |          16 17 18 |     |          44 45 46 |
c         |20|      |             19 20 |     |             55 56 |
c         |21|      |                21 |     |                66 |
c
c Rotation matrix is 21x21 in size, filled with combinations of 
c	directional cosines that define the rotation. These directional
c	cosines must be predefined in code that calls these subroutines.
c	Typical notation for direction cosines is a_ij relating new 
c	coordinate frame to original.
c
c Here, directional cosines are dircos(3,3) = a(row,col) 
c	[not necessarily symmetric].
c
c Code provided below will define rotation matrix given directional cosines, 
c then rotate C21 tensor, producing rotated R21 tensor:
c
c (a) Transfer between Voigt 6x6 elastic tensor and 21x1 vector:
c	subroutine sub_C6x6_to_C21x1(c6x6_in,c21x1_out)
c	subroutine sub_C21x1_to_C6x6(c21x1_in,c6x6_out)
c
c (b) Define 21x21 rotation matrix elements given directional cosines.
c	subroutine sub_set_rotmatrix(dircos,rotmatrix_21x21)
c
c (c) Perform rotation by vector multiplication |R| = |ROTMAT| |C|
c	subroutine sub_perform_c21_rotation(c21_in,rotmatrix_21x21,r21_out)
c
c (0) Umbrella subroutine to rotate a Voigt 6x6 elastic stiffness tensor
c	using the 21-element vector notation.
c	subroutine rotate_stiffness_6x6(c6x6_in,dircos,r6x6_out)
c
c===========================================================================
c 2017 Dec: Rotation matrix 21x21 elements defined by Senthil Vel (Univ Maine)
c		using Mathematica.
c	    Fortran coding by David Okaya (Univ Southern California).
c===========================================================================

c:::::::::::::::::::::::::::::::::::::::::::::::::::::::::::::::::::::::::::
c (0) Umbrella subroutine to rotate a 6x6 elastic stiffness tensor using 
c	21-element vectors.
c             (1) Define 21x21 rotation matrix given 3x3 directional cosines.
c             (2) Transfer 6x6 stiffness to 21x1 vector.
c             (3) Rotate stiffness vector, producing rotated R21x1 stiffness.
c             (4) Transfer rotated stiffness vector into 6x6 stiffness.
c
        subroutine rotate_stiffness_6x6(c6x6_in,dircos,r6x6_out)
        implicit none
        real*8  c6x6_in(6,6), r6x6_out(6,6), dircos(3,3)

        real*8  c21_in(21),r21_out(21)
        real*8  rotmatrix_21x21(21,21)

        call sub_set_rotmatrix(dircos,rotmatrix_21x21)
        call sub_C6x6_to_C21x1(c6x6_in,c21_in)
        call sub_perform_c21_rotation(c21_in,rotmatrix_21x21,r21_out)
        call sub_C21x1_to_C6x6(r21_out,r6x6_out)

        return
        end


c===========================================================================
c (a) Transfer between Voigt 6x6 elastic tensor and 21x1 vector.
c		subroutine sub_C6x6_to_C21x1(c6x6_in,c21x1_out)
c		subroutine sub_C21x1_to_C6x6(c21x1_in,c6x6_out)
c         | 1|       21-element indices:         6x6 ij indices:
c         | 2|      | 1   2  3  4  5  6 |     | 11 12 13 14 15 16 |
c         | 3|      |     7  8  9 10 11 |     |    22 23 24 25 26 |
c  C_21x1 | :|   =  |       12 13 14 15 |  =  |       33 34 35 36 |
c         | :|      |          16 17 18 |     |          44 45 46 |
c         |20|      |             19 20 |     |             55 56 |
c         |21|      |                21 |     |                66 |

	subroutine sub_C6x6_to_C21x1(c6x6_in,c21x1_out)
	implicit none
	real*8	c6x6_in(6,6),c21x1_out(21)
	integer	i,j

	do i = 1,21
		c21x1_out(i) = 0.D0
	enddo

	c21x1_out( 1) = c6x6_in(1,1)
	c21x1_out( 2) = c6x6_in(1,2)
	c21x1_out( 3) = c6x6_in(1,3)
	c21x1_out( 4) = c6x6_in(1,4)
	c21x1_out( 5) = c6x6_in(1,5)
	c21x1_out( 6) = c6x6_in(1,6)

	c21x1_out( 7) = c6x6_in(2,2)
	c21x1_out( 8) = c6x6_in(2,3)
	c21x1_out( 9) = c6x6_in(2,4)
	c21x1_out(10) = c6x6_in(2,5)
	c21x1_out(11) = c6x6_in(2,6)

	c21x1_out(12) = c6x6_in(3,3)
	c21x1_out(13) = c6x6_in(3,4)
	c21x1_out(14) = c6x6_in(3,5)
	c21x1_out(15) = c6x6_in(3,6)

	c21x1_out(16) = c6x6_in(4,4)
	c21x1_out(17) = c6x6_in(4,5)
	c21x1_out(18) = c6x6_in(4,6)

	c21x1_out(19) = c6x6_in(5,5)
	c21x1_out(20) = c6x6_in(5,6)

	c21x1_out(21) = c6x6_in(6,6)

	return
	end


	subroutine sub_C21x1_to_C6x6(c21x1_in,c6x6_out)
	implicit none
	real*8	c21x1_in(21), c6x6_out(6,6)
	integer	i,j

	do j = 1,6
	do i = 1,6
		c6x6_out(i,j) = 0.D0
	enddo
	enddo

	c6x6_out(1,1) = c21x1_in( 1)
	c6x6_out(1,2) = c21x1_in( 2)
	c6x6_out(1,3) = c21x1_in( 3)
	c6x6_out(1,4) = c21x1_in( 4)
	c6x6_out(1,5) = c21x1_in( 5)
	c6x6_out(1,6) = c21x1_in( 6)

	c6x6_out(2,2) = c21x1_in( 7)
	c6x6_out(2,3) = c21x1_in( 8)
	c6x6_out(2,4) = c21x1_in( 9)
	c6x6_out(2,5) = c21x1_in(10)
	c6x6_out(2,6) = c21x1_in(11)

	c6x6_out(3,3) = c21x1_in(12)
	c6x6_out(3,4) = c21x1_in(13)
	c6x6_out(3,5) = c21x1_in(14)
	c6x6_out(3,6) = c21x1_in(15)

	c6x6_out(4,4) = c21x1_in(16)
	c6x6_out(4,5) = c21x1_in(17)
	c6x6_out(4,6) = c21x1_in(18)

	c6x6_out(5,5) = c21x1_in(19)
	c6x6_out(5,6) = c21x1_in(20)

	c6x6_out(6,6) = c21x1_in(21)

c lower left elements
	c6x6_out(2,1) = c6x6_out(1,2)

	c6x6_out(3,1) = c6x6_out(1,3)
	c6x6_out(3,2) = c6x6_out(2,3)

	c6x6_out(4,1) = c6x6_out(1,4)
	c6x6_out(4,2) = c6x6_out(2,4)
	c6x6_out(4,3) = c6x6_out(3,4)

	c6x6_out(5,1) = c6x6_out(1,5)
	c6x6_out(5,2) = c6x6_out(2,5)
	c6x6_out(5,3) = c6x6_out(3,5)
	c6x6_out(5,4) = c6x6_out(4,5)

	c6x6_out(6,1) = c6x6_out(1,6)
	c6x6_out(6,2) = c6x6_out(2,6)
	c6x6_out(6,3) = c6x6_out(3,6)
	c6x6_out(6,4) = c6x6_out(4,6)
	c6x6_out(6,5) = c6x6_out(5,6)

	return
	end


c===========================================================================
c (c) Perform rotation by vector multiplication |R| = |ROTMAT| |C|
c     rotmat() here same as rotmatrix_21x21() in calling routines.
	subroutine sub_perform_c21_rotation(c21_in,rotmat,r21_out)
	implicit none
	real*8		c21_in(21),rotmat(21,21),r21_out(21)

	integer	row,col

	do row = 1,21
		r21_out(row) = 0.D0
	enddo

	do row = 1,21
	    do col = 1,21
		r21_out(row) = r21_out(row) + rotmat(row,col)*c21_in(col)
	    enddo
	enddo

	return
	end


c===========================================================================
c (b) Define 21x21 rotation matrix elements given directional cosines.
c     rotmat() here same as rotmatrix_21x21() in calling routines.
	subroutine sub_set_rotmatrix(dircos,rotmat)
	implicit none
	real*8	dircos(3,3),rotmat(21,21)
	integer	row,col
	real*8	a11,a12,a13, a21,a22,a23, a31,a32,a33

c---------------------------------------------------------------
c clear outgoing 21x21 rotation matrix. 
	do row = 1,21
	do col = 1,21
		rotmat(row,col) = 0.D0
	enddo
	enddo

c---------------------------------------------------------------
c use internal names to shorten code lines.
	a11 = dircos(1,1)
	a12 = dircos(1,2)
	a13 = dircos(1,3)
	a21 = dircos(2,1)
	a22 = dircos(2,2)
	a23 = dircos(2,3)
	a31 = dircos(3,1)
	a32 = dircos(3,2)
	a33 = dircos(3,3)

c---------------------------------------------------------------
c fill 21x21.

c column 1 ............................................
	col = 1
	rotmat( 1,col) = (a11**4)
	rotmat( 2,col) = (a11**2) *  a21**2
	rotmat( 3,col) = (a11**2)             * a31**2
	rotmat( 4,col) = (a11**2) *  a21      * a31
	rotmat( 5,col) = (a11**3)             * a31
	rotmat( 6,col) = (a11**3) *  a21

	rotmat( 7,col) =            (a21**4)
	rotmat( 8,col) =            (a21**2)  * a31**2
	rotmat( 9,col) =            (a21**3)  * a31
	rotmat(10,col) =  a11     * (a21**2)  * a31
	rotmat(11,col) =  a11     * (a21**3) 

	rotmat(12,col) =                        a31**4 
	rotmat(13,col) =             a21      * a31**3
	rotmat(14,col) =  a11                 * a31**3
	rotmat(15,col) =  a11     *  a21      * a31**2

	rotmat(16,col) =            (a21**2)  * a31**2
	rotmat(17,col) =  a11     *  a21      * a31**2
	rotmat(18,col) =  a11     * (a21**2)  * a31
	rotmat(19,col) = (a11**2)             * a31**2
	rotmat(20,col) = (a11**2) *  a21      * a31
	rotmat(21,col) = (a11**2) *  a21      * a31
	rotmat(21,col) = (a11**2) *  a21**2

c column 2 ............................................
	col = 2
	rotmat( 1,col) = 2.D0 *(a11**2)*(a12**2)
	rotmat( 2,col) =       (a11**2)*(a22**2)   +      (a12**2)*(a21**2)
	rotmat( 3,col) =       (a11**2)*(a32**2)   +      (a12**2)*(a31**2)
	rotmat( 4,col) =       (a11**2)* a22 * a32 +      (a12**2)* a21 * a31 
	rotmat( 5,col) =       (a11**2)* a12 * a32 + a11 *(a12**2)* a31 
	rotmat( 6,col) =       (a11**2)* a12 * a22 + a11 *(a12**2)* a21 

	rotmat( 7,col) = 2.D0 *(a21**2)*(a22**2)
	rotmat( 8,col) =       (a21**2)*(a32**2)   +            (a22**2)* a31**2
	rotmat( 9,col) =       (a21**2)* a22 * a32 + a21       *(a22**2)* a31
	rotmat(10,col) =  a12 *(a21**2)* a32       + a11       *(a22**2)* a31 
	rotmat(11,col) =  a12 *(a21**2)* a22       + a11 * a21 *(a22**2)

	rotmat(12,col) = 2.D0 *(a31**2)*(a32**2)
	rotmat(13,col) =  a22       *(a31**2)* a32 + a21 * a31 * a32**2
	rotmat(14,col) =  a12       *(a31**2)* a32 + a11 * a31 * a32**2
	rotmat(15,col) =  a12 * a22 *(a31**2)      + a11 * a21 * a32**2

	rotmat(16,col) = 2.D0 * a21*a22*a31*a32
	rotmat(17,col) =        a12*a21*a31*a32 + a11*a22*a31*a32
	rotmat(18,col) =        a12*a21*a22*a31 + a11*a21*a22*a32
	rotmat(19,col) = 2.D0 * a11*a12*a31*a32
	rotmat(20,col) =        a11*a12*a22*a31 + a11*a12*a21*a32
	rotmat(21,col) = 2.D0 * a11*a12*a21*a32

c column 3 ............................................
	col = 3
	rotmat( 1,col) = 2.D0 *(a11**2)* a13**2
	rotmat( 2,col) =       (a11**2)* a23**2    +       a13**2 * a21**2 
	rotmat( 3,col) =       (a11**2)* a33**2    +       a13**2 * a31**2 
	rotmat( 4,col) =       (a11**2)* a23 * a33 +       a13**2 * a21 * a31
	rotmat( 5,col) =       (a11**2)* a13 * a33 + a11 * a13**2 * a31 
	rotmat( 6,col) =       (a11**2)* a13 * a23 + a11 * a13**2 * a21 

	rotmat( 7,col) = 2.D0 *(a21**2)* a23**2
	rotmat( 8,col) =       (a21**2)* a33**2    +            (a23**2)* a31**2
	rotmat( 9,col) =       (a21**2)* a23 * a33 + a21       *(a23**2)* a31
	rotmat(10,col) =  a13 *(a21**2)* a33       + a11       *(a23**2)* a31 
	rotmat(11,col) =  a13 *(a21**2)* a23       + a11 * a21 *(a23**2)

	rotmat(12,col) = 2.D0 *(a31**2)* a33**2
	rotmat(13,col) =        a23 *(a31**2)* a33 + a21 * a31 * a33**2
	rotmat(14,col) =        a13 *(a31**2)* a33 + a11 * a31 * a33**2
	rotmat(15,col) =  a13 * a23 *(a31**2)      + a11 * a21 * a33**2

	rotmat(16,col) = 2.D0 * a21*a23*a31*a33
	rotmat(17,col) =        a13*a21*a31*a33 + a11*a23*a31*a33
	rotmat(18,col) =        a13*a21*a23*a31 + a11*a21*a23*a33
	rotmat(19,col) = 2.D0 * a11*a13*a31*a33
	rotmat(20,col) =        a11*a13*a23*a31 + a11*a13*a21*a33
	rotmat(21,col) = 2.D0 * a11*a13*a21*a23

c column 4 ............................................
	col = 4
	rotmat( 1,col) = 4.D0 *(a11**2)* a12 * a13
	rotmat( 2,col) = 2.D0*a12*a13*(a21**2) + 2.D0*(a11**2)*a22*a23
	rotmat( 3,col) = 2.D0*a12*a13*(a31**2) + 2.D0*(a11**2)*a32*a33
	rotmat( 4,col) = 2.D0*a12*a13*a21*a31  + (a11**2)*(a23*a32 + a22*a33)
	rotmat( 5,col) = 2.D0*a11*a12*a13*a31  + (a11**2)*(a13*a32 + a12*a33)
	rotmat( 6,col) = 2.D0*a11*a12*a13*a21  + (a11**2)*(a13*a22 + a12*a23)

	rotmat( 7,col) = 4.D0 * a21**2 * a22 * a23
	rotmat( 8,col) = 2.D0*a22*a23*(a31**2) + 2.D0*(a21**2)*a32*a33
	rotmat( 9,col) = 2.D0*a21*a22*a23*a31  + (a21**2)*(a23*a32 + a22*a33)
	rotmat(10,col) = 2.D0*a11*a22*a23*a31  + (a21**2)*(a13*a32 + a12*a33)
	rotmat(11,col) = 2.D0*a11*a21*a22*a23  + (a21**2)*(a13*a22 + a12*a23)

	rotmat(12,col) = 4.D0 * a31**2 * a32 * a33
	rotmat(13,col) = 2.D0*a21*a31*a32*a33  + (a31**2)*(a23*a32 + a22*a33)
	rotmat(14,col) = 2.D0*a11*a31*a32*a33  + (a31**2)*(a13*a32 + a12*a33)
	rotmat(15,col) = 2.D0*a11*a21*a32*a33  + (a31**2)*(a13*a22 + a12*a23)

	rotmat(16,col) = 2.D0 * a21 * a31 * (a23*a32 + a22*a33)
	rotmat(17,col) = a21*a31*(a13*a32+a12*a33) + a11*a31*(a23*a32+a22*a33)
	rotmat(18,col) = a21*a31*(a13*a22+a12*a23) + a11*a21*(a23*a32+a22*a33)

	rotmat(19,col) = 2.D0 * a11 * a31 * (a13*a32 + a12*a33)
	rotmat(20,col) = a11*a31*(a13*a22+a12*a23) + a11*a21*(a13*a32+a12*a33)
	rotmat(21,col) = 2.D0 * a11 * a21 * (a13*a22 + a12*a23)


c column 5 ............................................
	col = 5
	rotmat( 1,col) = 4.D0 *(a11**3)* a13
	rotmat( 2,col) = 2.D0*a11*a13*(a21**2) + 2.D0*(a11**2)*a21*a23
	rotmat( 3,col) = 2.D0*a11*a13*(a31**2) + 2.D0*(a11**2)*a31*a33
	rotmat( 4,col) = 2.D0* a11*a13*a21*a31 + (a11**2)*(a23*a31 + a21*a33)
	rotmat( 5,col) = 2.D0*(a11**2)*a13*a31 + (a11**2)*(a13*a31 + a11*a33)
	rotmat( 6,col) = 2.D0*(a11**2)*a13*a21 + (a11**2)*(a13*a21 + a11*a23)

	rotmat( 7,col) = 4.D0 *(a21**3)* a23
	rotmat( 8,col) = 2.D0*a21*a23*(a31**2) + 2.D0*(a21**2)*a31*a33
	rotmat( 9,col) = 2.D0*(a21**2)*a23*a31 + (a21**2)*(a23*a31 + a21*a33)
	rotmat(10,col) = 2.D0* a11*a21*a23*a31 + (a21**2)*(a13*a31 + a11*a33)
	rotmat(11,col) = 2.D0*a11*(a21**2)*a23 + (a21**2)*(a13*a21 + a11*a23)

	rotmat(12,col) = 4.D0 *(a31**3)* a33
	rotmat(13,col) = 2.D0*a21*(a31**2)*a33 + (a31**2)*(a23*a31 + a21*a33)
	rotmat(14,col) = 2.D0*a11*(a31**2)*a33 + (a31**2)*(a13*a31 + a11*a33)
	rotmat(15,col) = 2.D0* a11*a21*a31*a33 + (a31**2)*(a13*a21 + a11*a23)

	rotmat(16,col) = 2.D0 * a21 * a31 * (a23*a31 + a21*a33)
	rotmat(17,col) = a21*a31*(a13*a31+a11*a33) + a11*a31*(a23*a31+a21*a33)
	rotmat(18,col) = a21*a31*(a13*a21+a11*a23) + a11*a21*(a23*a31+a21*a33)

	rotmat(19,col) = 2.D0 * a11 * a31 * (a13*a31 + a11*a33)
	rotmat(20,col) = a11*a31*(a13*a21+a11*a23) + a11*a21*(a13*a31+a11*a33)
	rotmat(21,col) = 2.D0 * a11 * a21 * (a13*a21 + a11*a23)


c column 6 ............................................
	col = 6
	rotmat( 1,col) = 4.D0 *(a11**3)* a12
	rotmat( 2,col) = 2.D0*a11*a12*(a21**2) + 2.D0*(a11**2)*a21*a22
	rotmat( 3,col) = 2.D0*a11*a12*(a31**2) + 2.D0*(a11**2)*a31*a32
	rotmat( 4,col) = 2.D0* a11*a12*a21*a31 + (a11**2)*(a22*a31 + a21*a32)
	rotmat( 5,col) = 2.D0*(a11**2)*a12*a31 + (a11**2)*(a12*a31 + a11*a32)
	rotmat( 6,col) = 2.D0*(a11**2)*a12*a21 + (a11**2)*(a12*a21 + a11*a22)

	rotmat( 7,col) = 4.D0 *(a21**3)* a22
	rotmat( 8,col) = 2.D0*a21*a22*(a31**2) + 2.D0*(a21**2)*a31*a32
	rotmat( 9,col) = 2.D0*(a21**2)*a22*a31 + (a21**2)*(a22*a31 + a21*a32)
	rotmat(10,col) = 2.D0* a11*a21*a22*a31 + (a21**2)*(a12*a31 + a11*a32)
	rotmat(11,col) = 2.D0*a11*(a21**2)*a22 + (a21**2)*(a12*a21 + a11*a22)

	rotmat(12,col) = 4.D0 *(a31**3)* a32
	rotmat(13,col) = 2.D0*a21*(a31**2)*a32 + (a31**2)*(a22*a31 + a21*a32)
	rotmat(14,col) = 2.D0*a11*(a31**2)*a32 + (a31**2)*(a12*a31 + a11*a32)
	rotmat(15,col) = 2.D0* a11*a21*a31*a32 + (a31**2)*(a12*a21 + a11*a22)

	rotmat(16,col) = 2.D0 * a21 * a31 * (a22*a31 + a21*a32)
	rotmat(17,col) = a21*a31*(a12*a31+a11*a32) + a11*a31*(a22*a31+a21*a32)
	rotmat(18,col) = a21*a31*(a12*a21+a11*a22) + a11*a21*(a22*a31+a21*a32)

	rotmat(19,col) = 2.D0 * a11 * a31 * (a12*a31 + a11*a32)
	rotmat(20,col) = a11*a31*(a12*a21+a11*a22) + a11*a21*(a12*a31+a11*a32)
	rotmat(21,col) = 2.D0 * a11 * a21 * (a12*a21 + a11*a22)

c column 7 ............................................
	col = 7
	rotmat( 1,col) = (a12**4)
	rotmat( 2,col) = (a12**2) * (a22**2)
	rotmat( 3,col) = (a12**2)            * a32**2
	rotmat( 4,col) = (a12**2) *  a22     * a32
	rotmat( 5,col) = (a12**3)            * a32
	rotmat( 6,col) = (a12**3) *  a22

	rotmat( 7,col) =            (a22**4)
	rotmat( 8,col) =            (a22**2) * a32**2
	rotmat( 9,col) =            (a22**3) * a32
	rotmat(10,col) =  a12     * (a22**2) * a32
	rotmat(11,col) =  a12     * (a22**3) 

	rotmat(12,col) =                       a32**4 
	rotmat(13,col) =             a22     * a32**3
	rotmat(14,col) =  a12                * a32**3
	rotmat(15,col) =  a12     *  a22     * a32**2

	rotmat(16,col) =            (a22**2) * a32**2
	rotmat(17,col) =  a12     *  a22     * a32**2
	rotmat(18,col) =  a12     * (a22**2) * a32
	rotmat(19,col) = (a12**2)            * a32**2
	rotmat(20,col) = (a12**2) *  a22     * a32
	rotmat(21,col) = (a12**2) *  a22**2

c column 8 ............................................
	col = 8
	rotmat( 1,col) = 2.D0 *(a12**2)*(a13**2)
	rotmat( 2,col) =       (a13**2)*(a22**2)   + (a12**2)* a23**2 
	rotmat( 3,col) =       (a13**2)*(a32**2)   + (a12**2)* a33**2 
	rotmat( 4,col) =       (a13**2)* a22 * a32 + (a12**2)* a23 * a33
	rotmat( 5,col) =  a12 *(a13**2)* a32       + (a12**2)* a13 * a33 
	rotmat( 6,col) =  a12 *(a13**2)* a22       + (a12**2)* a13 * a23 

	rotmat( 7,col) = 2.D0 *(a22**2)*(a23**2)
	rotmat( 8,col) =       (a23**2)*(a32**2)   +      (a22**2)* a33**2
	rotmat( 9,col) =  a22 *(a23**2)* a32       +      (a22**2)* a23 * a33
	rotmat(10,col) =  a12 *(a23**2)* a32       + a13 *(a22**2)* a33
	rotmat(11,col) =  a13 *(a22**2)* a23       + a12 * a22    * a23**2

	rotmat(12,col) = 2.D0 *(a32**2)* a33**2
	rotmat(13,col) =        a23 *(a32**2)* a33 + a22 * a32 * a33**2
	rotmat(14,col) =        a13 *(a32**2)* a33 + a12 * a32 * a33**2
	rotmat(15,col) =  a13 * a23 *(a32**2)      + a12 * a22 * a33**2

	rotmat(16,col) = 2.D0 * a22*a23*a32*a33
	rotmat(17,col) =        a13*a22*a32*a33 + a12*a23*a32*a33
	rotmat(18,col) =        a13*a22*a23*a32 + a12*a22*a23*a33
	rotmat(19,col) = 2.D0 * a12*a13*a32*a33
	rotmat(20,col) =        a12*a13*a23*a32 + a12*a13*a22*a33
	rotmat(21,col) = 2.D0 * a12*a13*a22*a23

c column 9 ............................................
	col = 9
	rotmat( 1,col) = 4.D0 * a12**3 * a13
	rotmat( 2,col) = 2.D0*a12*a13*(a22**2) + 2.D0*(a12**2)*a22*a23
	rotmat( 3,col) = 2.D0*a12*a13*(a32**2) + 2.D0*(a12**2)*a32*a33
	rotmat( 4,col) = 2.D0* a12*a13*a22*a32 + (a12**2)*(a23*a32 + a22*a33)
	rotmat( 5,col) = 2.D0*(a12**2)*a13*a32 + (a12**2)*(a13*a32 + a12*a33)
	rotmat( 6,col) = 2.D0*(a12**2)*a13*a22 + (a12**2)*(a13*a22 + a12*a23)

	rotmat( 7,col) = 4.D0 * a22**3 * a23
	rotmat( 8,col) = 2.D0*a22*a23*(a32**2) + 2.D0*(a22**2)*a32*a33
	rotmat( 9,col) = 2.D0*(a22**2)*a23*a32 + (a22**2)*(a23*a32 + a22*a33)
	rotmat(10,col) = 2.D0* a12*a22*a23*a32 + (a22**2)*(a13*a32 + a12*a23)
	rotmat(11,col) = 2.D0*a12*(a22**2)*a23 + (a22**2)*(a13*a22 + a12*a23)

	rotmat(12,col) = 4.D0 * a32**3 * a33
	rotmat(13,col) = 2.D0*a22*(a32**2)*a33 + (a32**2)*(a23*a32 + a22*a33)
	rotmat(14,col) = 2.D0*a12*(a32**2)*a33 + (a32**2)*(a13*a32 + a12*a33)
	rotmat(15,col) = 2.D0* a12*a22*a32*a33 + (a32**2)*(a13*a22 + a12*a23)

	rotmat(16,col) = 2.D0 * a22 * a32 * (a23*a32 + a22*a33)
	rotmat(17,col) = a22*a33*(a13*a32+a12*a33) + a12*a32*(a23*a32+a22*a33)
	rotmat(18,col) = a22*a32*(a13*a22+a12*a23) + a12*a22*(a23*a32+a22*a33)

	rotmat(19,col) = 2.D0 * a12 * a32 * (a13*a32 + a12*a33)
	rotmat(20,col) = a12*a32*(a13*a22+a12*a23) + a12*a22*(a13*a32+a12*a33)
	rotmat(21,col) = 2.D0 * a12 * a22 * (a13*a22 + a12*a23)

c column 10 ............................................
	col = 10
	rotmat( 1,col) = 4.D0 * a11 *(a12**2)* a13
	rotmat( 2,col) = 2.D0*a11*a13*(a22**2) + 2.D0*(a12**2)*a21*a23
	rotmat( 3,col) = 2.D0*a11*a13*(a32**2) + 2.D0*(a12**2)*a31*a33
	rotmat( 4,col) = 2.D0*a11*a13*a22*a32  + (a12**2)*(a23*a31 + a21*a33)
	rotmat( 5,col) = 2.D0*a11*a12*a13*a32  + (a12**2)*(a13*a31 + a11*a33)
	rotmat( 6,col) = 2.D0*a11*a12*a13*a22  + (a12**2)*(a13*a21 + a11*a23)

	rotmat( 7,col) = 4.D0 * a21 *(a22**2)* a23
	rotmat( 8,col) = 2.D0*a21*a23*(a32**2) + 2.D0*(a22**2)*a31*a33
	rotmat( 9,col) = 2.D0*a21*a22*a23*a32  + (a22**2)*(a23*a31 + a21*a33)
	rotmat(10,col) = 2.D0*a12*a21*a23*a32  + (a22**2)*(a13*a31 + a11*a33)
	rotmat(11,col) = 2.D0*a12*a21*a22*a23  + (a22**2)*(a13*a21 + a11*a23)

	rotmat(12,col) = 4.D0 * a31 *(a32**2)* a33
	rotmat(13,col) = 2.D0*a22*a31*a32*a33  + (a32**2)*(a23*a31 + a21*a33)
	rotmat(14,col) = 2.D0*a12*a31*a32*a33  + (a32**2)*(a13*a31 + a11*a33)
	rotmat(15,col) = 2.D0*a12*a22*a31*a33  + (a32**2)*(a13*a21 + a11*a23)

	rotmat(16,col) = 2.D0 * a22 * a32 * (a23*a31 + a21*a33)
	rotmat(17,col) = a22*a32*(a13*a31+a11*a33) + a12*a32*(a23*a31+a21*a33)
	rotmat(18,col) = a22*a32*(a13*a21+a11*a23) + a12*a22*(a23*a31+a21*a33)

	rotmat(19,col) = 2.D0 * a12 * a32 * (a13*a31 + a11*a33)
	rotmat(20,col) = a12*a32*(a13*a21+a11*a23) + a12*a22*(a13*a31+a11*a33)
	rotmat(21,col) = 2.D0 * a12 * a22 * (a13*a21 + a11*a23)

c column 11 ............................................
	col = 11
	rotmat( 1,col) = 4.D0 * a11 * a12**3
	rotmat( 2,col) = 2.D0*(a12**2)*a21*a22 + 2.D0*a11*a12*(a22**2)
	rotmat( 3,col) = 2.D0*(a12**2)*a31*a32 + 2.D0*a11*a12*(a32**2)
	rotmat( 4,col) = 2.D0* a11*a12*a22*a32 + (a12**2)*(a22*a31 + a21*a32)
	rotmat( 5,col) = 2.D0*a11*(a12**2)*a32 + (a12**2)*(a12*a31 + a11*a32)
	rotmat( 6,col) = 2.D0*a11*(a12**2)*a22 + (a12**2)*(a12*a21 + a11*a22)

	rotmat( 7,col) = 4.D0 * a21 * a22**3
	rotmat( 8,col) = 2.D0*(a22**2)*a31*a32 + 2.D0*a21*a22*(a32**2)
	rotmat( 9,col) = 2.D0*a21*(a22**2)*a32 + (a22**2)*(a22*a31 + a21*a32)
	rotmat(10,col) = 2.D0* a12*a21*a22*a32 + (a22**2)*(a12*a31 + a11*a32)
	rotmat(11,col) = 2.D0*a12*a21*(a22**2) + (a22**2)*(a12*a21 + a11*a22)

	rotmat(12,col) = 4.D0 * a31 * a32**3
	rotmat(13,col) = 2.D0*a22*a31*(a32**2) + (a32**2)*(a22*a31 + a21*a32)
	rotmat(14,col) = 2.D0*a12*a31*(a32**2) + (a32**2)*(a12*a31 + a11*a32)
	rotmat(15,col) = 2.D0* a12*a22*a31*a32 + (a32**2)*(a12*a21 + a11*a22)

	rotmat(16,col) = 2.D0 * a22 * a32 * (a22*a31 + a21*a32)
	rotmat(17,col) = a22*a32*(a12*a31+a11*a32) + a12*a32*(a22*a31+a21*a32)
	rotmat(18,col) = a22*a32*(a12*a21+a11*a22) + a12*a22*(a22*a31+a21*a32)

	rotmat(19,col) = 2.D0 * a12 * a32 * (a12*a31 + a11*a32)
	rotmat(20,col) = a12*a32*(a12*a21+a11*a22) + a12*a22*(a12*a31+a11*a32)
	rotmat(21,col) = 2.D0 * a12 * a22 * (a12*a21 + a11*a22)

c column 12 ............................................ from col 7.
	col = 12
	rotmat( 1,col) =  a13**4
	rotmat( 2,col) = (a13**2) *  a23**2
	rotmat( 3,col) = (a13**2)            * a33**2
	rotmat( 4,col) = (a13**2) *  a23     * a33
	rotmat( 5,col) = (a13**3)            * a33
	rotmat( 6,col) = (a13**3) *  a23

	rotmat( 7,col) =            (a23**4)
	rotmat( 8,col) =            (a23**2) * a33**2
	rotmat( 9,col) =            (a23**3) * a33
	rotmat(10,col) =  a13     * (a23**2) * a33
	rotmat(11,col) =  a13     * (a23**3)

	rotmat(12,col) =                       a33**4 
	rotmat(13,col) =             a23     * a33**3
	rotmat(14,col) =  a13                * a33**3
	rotmat(15,col) =  a13     *  a23     * a33**2

	rotmat(16,col) =            (a23**2) * a33**2
	rotmat(17,col) =  a13     *  a23     * a33**2
	rotmat(18,col) =  a13     * (a23**2) * a33
	rotmat(19,col) = (a13**2)            * a33**2
	rotmat(20,col) = (a13**2) *  a23     * a33
	rotmat(21,col) = (a13**2) *  a23**2

c column 13 ............................................
	col = 13
	rotmat( 1,col) = 4.D0 * a12 * a13**3
	rotmat( 2,col) = 2.D0*(a13**2)*a22*a23 + 2.D0*a12*a13*(a23**2)
	rotmat( 3,col) = 2.D0*(a13**2)*a32*a33 + 2.D0*a12*a13*(a33**2)
	rotmat( 4,col) = 2.D0* a12*a13*a23*a33 + (a13**2)*(a23*a32 + a22*a33)
	rotmat( 5,col) = 2.D0*a12*(a13**2)*a33 + (a13**2)*(a13*a32 + a12*a33)
	rotmat( 6,col) = 2.D0*a12*(a13**2)*a23 + (a13**2)*(a13*a22 + a12*a23)

	rotmat( 7,col) = 4.D0 * a22 * a23**3
	rotmat( 8,col) = 2.D0*(a23**2)*a32*a33 + 2.D0*a22*a23*(a33**2)
	rotmat( 9,col) = 2.D0*a22*(a23**2)*a33 + (a23**2)*(a23*a32 + a22*a33)
	rotmat(10,col) = 2.D0* a13*a22*a23*a33 + (a23**2)*(a13*a32 + a12*a33)
	rotmat(11,col) = 2.D0*a13*a22*(a23**2) + (a23**2)*(a13*a22 + a12*a23)

	rotmat(12,col) = 4.D0 * a32 * a33**3
	rotmat(13,col) = 2.D0*a23*a32*(a33**2) + (a33**2)*(a23*a32 + a22*a33)
	rotmat(14,col) = 2.D0*a13*a32*(a33**2) + (a33**2)*(a13*a32 + a12*a33)
	rotmat(15,col) = 2.D0* a13*a23*a32*a33 + (a33**2)*(a13*a22 + a12*a23)

	rotmat(16,col) = 2.D0 * a23 * a33 * (a23*a32 + a22*a33)
	rotmat(17,col) = a23*a33*(a13*a32+a12*a33) + a13*a33*(a23*a32+a22*a33)
	rotmat(18,col) = a23*a33*(a13*a22+a12*a23) + a13*a23*(a23*a32+a22*a33)

	rotmat(19,col) = 2.D0 * a13 * a33 * (a13*a32 + a12*a33)
	rotmat(20,col) = a13*a33*(a13*a22+a12*a23) + a13*a23*(a13*a32+a12*a33)
	rotmat(21,col) = 2.D0 * a13 * a23 * (a13*a22 + a12*a23)

c column 14 ............................................
	col = 14
	rotmat( 1,col) = 4.D0 * a11 * a13**3
	rotmat( 2,col) = 2.D0*(a13**2)*a21*a23 + 2.D0*a11*a13*(a23**2)
	rotmat( 3,col) = 2.D0*(a13**2)*a31*a33 + 2.D0*a11*a13*(a33**2)
	rotmat( 4,col) = 2.D0* a11*a13*a23*a33 + (a13**2)*(a23*a31 + a21*a33)
	rotmat( 5,col) = 2.D0*a11*(a13**2)*a33 + (a13**2)*(a13*a31 + a11*a33)
	rotmat( 6,col) = 2.D0*a11*(a13**2)*a23 + (a13**2)*(a13*a21 + a11*a23)

	rotmat( 7,col) = 4.D0 * a21 * a23**3
	rotmat( 8,col) = 2.D0*(a23**2)*a31*a33 + 2.D0*a21*a23*(a33**2)
	rotmat( 9,col) = 2.D0*a21*(a23**2)*a33 + (a23**2)*(a23*a31 + a21*a33)
	rotmat(10,col) = 2.D0* a13*a21*a23*a33 + (a23**2)*(a13*a31 + a11*a33)
	rotmat(11,col) = 2.D0*a13*a21*(a23**2) + (a23**2)*(a13*a21 + a11*a23)

	rotmat(12,col) = 4.D0 * a31 * a33**3
	rotmat(13,col) = 2.D0*a23*a31*(a33**2) + (a33**2)*(a23*a31 + a21*a33)
	rotmat(14,col) = 2.D0*a13*a31*(a33**2) + (a33**2)*(a13*a31 + a11*a33)
	rotmat(15,col) = 2.D0* a13*a23*a31*a33 + (a33**2)*(a13*a21 + a11*a23)

	rotmat(16,col) = 2.D0 * a23 * a33 * (a23*a31 + a21*a33)
	rotmat(17,col) = a23*a33*(a13*a31+a11*a33) + a13*a33*(a23*a31+a21*a33)
	rotmat(18,col) = a23*a33*(a13*a21+a11*a23) + a13*a23*(a23*a31+a21*a33)

	rotmat(19,col) = 2.D0 * a13 * a33 * (a13*a31 + a11*a33)
	rotmat(20,col) = a13*a33*(a13*a21+a11*a23) + a13*a23*(a13*a31+a11*a33)
	rotmat(21,col) = 2.D0 * a13 * a23 * (a13*a21 + a11*a23)

c column 15 ............................................
	col = 15
	rotmat( 1,col) = 4.D0 * a11 * a12 * a13**2

	rotmat( 2,col) = 2.D0*(a13**2)*a21*a22 + 2.D0*a11*a12*(a23**2) 
	rotmat( 3,col) = 2.D0*(a13**2)*a31*a32 + 2.D0*a11*a12*(a33**2) 

	rotmat( 4,col) = 2.D0*a11*a12*a23*a33  + (a13**2)*(a22*a31 + a21*a32)
	rotmat( 5,col) = 2.D0*a11*a12*a13*a33  + (a13**2)*(a12*a31 + a11*a32)
	rotmat( 6,col) = 2.D0*a11*a12*a13*a23  + (a13**2)*(a12*a21 + a11*a22)

	rotmat( 7,col) = 4.D0 * a21 * a22 * a23**2
	rotmat( 8,col) = 2.D0*(a23**2)*a31*a32 + 2.D0*a21*a22*(a33**2)

	rotmat( 9,col) = 2.D0*a21*a22*a23*a33  + (a23**2)*(a22*a31 + a21*a32)
	rotmat(10,col) = 2.D0*a13*a21*a22*a33  + (a23**2)*(a12*a31 + a11*a32)
	rotmat(11,col) = 2.D0*a13*a21*a22*a23  + (a23**2)*(a12*a21 + a11*a22)

	rotmat(12,col) = 4.D0 * a31 * a32 * a33**2
	rotmat(13,col) = 2.D0*a23*a31*a32*a33  + (a33**2)*(a22*a31 + a21*a32)
	rotmat(14,col) = 2.D0*a13*a31*a32*a33  + (a33**2)*(a12*a31 + a11*a32)
	rotmat(15,col) = 2.D0*a13*a23*a31*a32  + (a33**2)*(a12*a21 + a11*a22)

	rotmat(16,col) = 2.D0 * a23 * a33 * (a22*a31 + a21*a32)
	rotmat(17,col) = a13*a33*(a22*a31+a21*a32) + a23*a33*(a12*a31+a11*a32)
	rotmat(18,col) = a13*a23*(a22*a31+a21*a32) + a23*a33*(a12*a21+a11*a22)

	rotmat(19,col) = 2.D0 * a13 * a33 * (a12*a31 + a11*a32)
	rotmat(20,col) = a13*a23*(a12*a31+a11*a32) + a13*a33*(a12*a21+a11*a22)
	rotmat(19,col) = 2.D0 * a13 * a23 * (a12*a21 + a11*a22)

c column 16 ............................................
	col = 16
	rotmat( 1,col) = 4.D0 *(a12**2)*(a13**2)
	rotmat( 2,col) = 4.D0 * a12 * a13 * a22 * a23
	rotmat( 3,col) = 4.D0 * a12 * a13 * a32 * a33
	rotmat( 4,col) = 2.D0 * a12 * a13 * (a23*a32 + a22*a33)
	rotmat( 5,col) = 2.D0 * a12 * a13 * (a13*a32 + a12*a33)
	rotmat( 6,col) = 2.D0 * a12 * a13 * (a13*a22 + a12*a23)

	rotmat( 7,col) = 4.D0 *(a22**2)*(a23**2)
	rotmat( 8,col) = 4.D0 * a22 * a23 * a32 * a33
	rotmat( 9,col) = 2.D0 * a22 * a23 * (a23*a32 + a22*a33)
	rotmat(10,col) = 2.D0 * a22 * a23 * (a13*a32 + a12*a33)
	rotmat(11,col) = 2.D0 * a22 * a23 * (a13*a22 + a12*a23)

	rotmat(12,col) = 4.D0 *(a32**2)*(a33**2)
	rotmat(13,col) = 2.D0 * a32 * a33 * (a23*a32 + a22*a33)
	rotmat(14,col) = 2.D0 * a32 * a33 * (a13*a32 + a12*a33)
	rotmat(15,col) = 2.D0 * a32 * a33 * (a13*a22 + a12*a23)

	rotmat(16,col) =  (a23*a32 + a22*a33)**2
	rotmat(17,col) =  (a13*a32 + a12*a33)*(a23*a32 + a22*a33)
	rotmat(18,col) =  (a13*a22 + a12*a23)*(a23*a32 + a22*a33)

	rotmat(19,col) =  (a13*a32 + a12*a33)**2
	rotmat(20,col) =  (a13*a22 + a12*a23)*(a13*a32 + a12*a33)
	rotmat(21,col) =  (a13*a22 + a12*a23)**2

c column 17 ............................................
	col = 17
	rotmat( 1,col) = 8.D0 * a11 * a12 * (a13**2)
	rotmat( 2,col) = 4.D0*a12*a13*a21*a23 + 4.D0*a11*a13*a22*a23
	rotmat( 3,col) = 4.D0*a12*a13*a31*a33 + 4.D0*a11*a13*a32*a33
	rotmat( 4,col) = 2.D0*a12*a13*(a23*a31 + a21*a33) + 
     +					 2.D0*a11*a13*(a23*a32 + a22*a33)
	rotmat( 5,col) = 2.D0*a12*a13*(a13*a31 + a11*a33) + 
     +					 2.D0*a11*a13*(a13*a32 + a12*a33)
	rotmat( 6,col) = 2.D0*a12*a13*(a13*a21 + a11*a23) + 
     +					 2.D0*a11*a13*(a13*a22 + a12*a23)

	rotmat( 7,col) = 8.D0 * a21 * a22 * (a23**2)
	rotmat( 8,col) = 4.D0*a22*a23*a31*a33 + 4.D0*a21*a23*a32*a33

	rotmat( 9,col) = 2.D0*a22*a23*(a23*a31 + a21*a33) + 
     +					 2.D0*a21*a23*(a23*a32 + a22*a33)
	rotmat(10,col) = 2.D0*a22*a23*(a13*a31 + a11*a33) + 
     +					 2.D0*a21*a23*(a13*a32 + a12*a33)
	rotmat(11,col) = 2.D0*a22*a23*(a13*a21 + a11*a23) + 
     +					 2.D0*a21*a23*(a13*a22 + a12*a23)

	rotmat(12,col) = 8.D0 * a31 * a32 * (a33**2)
	rotmat(13,col) = 2.D0*a32*a33*(a23*a31 + a21*a33) + 
     +					 2.D0*a31*a33*(a23*a32 + a22*a33)
	rotmat(14,col) = 2.D0*a32*a33*(a13*a31 + a11*a33) + 
     +					 2.D0*a31*a33*(a13*a32 + a12*a33)
	rotmat(15,col) = 2.D0*a32*a33*(a13*a21 + a11*a23) + 
     +					 2.D0*a31*a33*(a13*a22 + a12*a23)

	rotmat(16,col) = 2.D0 * (a23*a31 + a21*a33)*(a23*a32 + a22*a33)
	rotmat(17,col) = (a13*a32+a12*a33)*(a23*a31+a21*a33) +
     +					(a13*a31+a11*a33)*(a23*a32+a22*a33)
	rotmat(18,col) = (a13*a22+a12*a23)*(a23*a31+a21*a33) +
     +					(a13*a21+a11*a23)*(a23*a32+a22*a33)

	rotmat(19,col) = 2.D0 * (a13*a31 + a11*a33)*(a13*a32 + a12*a33)
	rotmat(20,col) = (a13*a22+a12*a23)*(a13*a31+a11*a33) +
     +					(a13*a21+a11*a23)*(a13*a32+a12*a33)
	rotmat(21,col) = 2.D0 * (a13*a21 + a11*a23)*(a13*a22 + a12*a23)


c column 18 ............................................
	col = 18
	rotmat( 1,col) = 8.D0 * a11 * (a12**2) * a13
	rotmat( 2,col) = 4.D0*a12*a13*a21*a22 + 4.D0*a11*a12*a22*a23
	rotmat( 3,col) = 4.D0*a12*a13*a31*a32 + 4.D0*a11*a12*a32*a33
	rotmat( 4,col) = 2.D0*a12*a13*(a22*a31 + a21*a32) + 
     +					 2.D0*a11*a12*(a23*a32 + a22*a33)
	rotmat( 5,col) = 2.D0*a12*a13*(a12*a31 + a11*a32) + 
     +					 2.D0*a11*a12*(a13*a32 + a12*a33)
	rotmat( 6,col) = 2.D0*a12*a13*(a12*a21 + a11*a22) + 
     +					 2.D0*a11*a12*(a13*a22 + a12*a23)

	rotmat( 7,col) = 8.D0 * a21 * (a22**2) * a23
	rotmat( 8,col) = 4.D0*a22*a23*a31*a32 + 4.D0*a21*a22*a32*a33
	rotmat( 9,col) = 2.D0*a22*a23*(a22*a31 + a21*a32) + 
     +					 2.D0*a21*a22*(a23*a32 + a22*a33)
	rotmat(10,col) = 2.D0*a22*a23*(a12*a31 + a11*a32) + 
     +					 2.D0*a21*a22*(a13*a32 + a12*a33)
	rotmat(11,col) = 2.D0*a22*a23*(a12*a21 + a11*a22) + 
     +					 2.D0*a21*a22*(a13*a22 + a12*a23)

	rotmat(12,col) = 8.D0 * a31 * (a32**2) * a33
	rotmat(13,col) = 2.D0*a32*a33*(a22*a31 + a21*a32) + 
     +					2.D0*a31*a32*(a23*a32 + a22*a33)
	rotmat(14,col) = 2.D0*a32*a33*(a12*a31 + a11*a32) + 
     +			 		2.D0*a31*a32*(a13*a32 + a12*a33)
	rotmat(15,col) = 2.D0*a32*a33*(a12*a21 + a11*a22) + 
     +					2.D0*a31*a32*(a13*a22 + a12*a23)

	rotmat(16,col) = 2.D0 * (a22*a31 + a21*a32)*(a23*a32 + a22*a33)
	rotmat(17,col) = (a13*a32+a12*a33)*(a22*a31+a21*a32) +
     +					(a12*a31+a11*a32)*(a23*a32+a22*a33)
	rotmat(18,col) = (a13*a22+a12*a23)*(a22*a31+a21*a32) +
     +					(a12*a21+a11*a22)*(a23*a32+a22*a33)

	rotmat(19,col) = 2.D0 * (a12*a31 + a11*a32)*(a13*a32 + a12*a33)
	rotmat(20,col) = (a13*a22+a12*a23)*(a12*a31+a11*a32) +
     +					(a12*a21+a11*a22)*(a13*a32+a12*a33)
	rotmat(21,col) = 2.D0 * (a12*a21 + a11*a22)*(a13*a22 + a12*a23)


c column 19 ............................................
	col = 19
	rotmat( 1,col) = 4.D0 *(a11**2)*(a13**2)
	rotmat( 2,col) = 4.D0 * a11 * a13 * a21 * a23
	rotmat( 3,col) = 4.D0 * a11 * a13 * a31 * a33
	rotmat( 4,col) = 2.D0 * a11 * a13 * (a23*a31 + a21*a33)
	rotmat( 5,col) = 2.D0 * a11 * a13 * (a13*a31 + a11*a33)
	rotmat( 6,col) = 2.D0 * a11 * a13 * (a13*a21 + a11*a23)

	rotmat( 7,col) = 4.D0 *(a21**2)*(a23**2)
	rotmat( 8,col) = 4.D0 * a21 * a23 * a31 * a33
	rotmat( 9,col) = 2.D0 * a21 * a23 * (a23*a31 + a21*a33)
	rotmat(10,col) = 2.D0 * a21 * a23 * (a13*a31 + a11*a33)
	rotmat(11,col) = 2.D0 * a21 * a23 * (a13*a21 + a11*a23)

	rotmat(12,col) = 4.D0 *(a31**2)*(a33**2)
	rotmat(13,col) = 2.D0 * a31 * a33 * (a23*a31 + a21*a33)
	rotmat(14,col) = 2.D0 * a31 * a33 * (a13*a31 + a11*a33)
	rotmat(15,col) = 2.D0 * a31 * a33 * (a13*a21 + a11*a23)

	rotmat(16,col) =  (a23*a31 + a21*a33)**2
	rotmat(17,col) =  (a13*a31 + a11*a33)*(a23*a31 + a21*a33)
	rotmat(18,col) =  (a13*a21 + a11*a23)*(a23*a31 + a21*a33)

	rotmat(19,col) =  (a13*a31 + a11*a33)**2
	rotmat(20,col) =  (a13*a21 + a11*a23)*(a13*a31 + a11*a33)
	rotmat(21,col) =  (a13*a21 + a11*a23)**2

c column 20 ............................................
	col = 20
	rotmat( 1,col) = 8.D0 * (a11**2) * a12 * a13
	rotmat( 2,col) = 4.D0*a11*a13*a21*a22 + 4.D0*a11*a12*a21*a23
	rotmat( 3,col) = 4.D0*a11*a13*a31*a32 + 4.D0*a11*a12*a31*a33
	rotmat( 4,col) = 2.D0*a11*a13*(a22*a31 + a21*a32) + 
     +					2.D0*a11*a12*(a23*a31 + a21*a33)
	rotmat( 5,col) = 2.D0*a11*a13*(a12*a31 + a11*a32) + 
     +					2.D0*a11*a12*(a13*a31 + a11*a33)
	rotmat( 6,col) = 2.D0*a11*a13*(a12*a21 + a11*a22) + 
     +					2.D0*a11*a12*(a13*a21 + a11*a23)

	rotmat( 7,col) = 8.D0 * (a21**2) * a22 * a23
	rotmat( 8,col) = 4.D0*a21*a23*a31*a32 + 4.D0*a21*a22*a31*a33

	rotmat( 9,col) = 2.D0*a21*a23*(a22*a31 + a21*a32) + 
     +					 2.D0*a21*a22*(a23*a31 + a21*a33)
	rotmat(10,col) = 2.D0*a21*a23*(a12*a31 + a11*a32) + 
     +					 2.D0*a21*a22*(a13*a31 + a11*a33)
	rotmat(11,col) = 2.D0*a21*a23*(a12*a21 + a11*a22) + 
     +					 2.D0*a21*a22*(a13*a21 + a11*a23)

	rotmat(12,col) = 8.D0 * (a31**2) * a32 * a33
	rotmat(13,col) = 2.D0*a31*a33*(a22*a31 + a21*a32) + 
     +					2.D0*a31*a32*(a23*a31 + a21*a33)
	rotmat(14,col) = 2.D0*a31*a33*(a12*a31 + a11*a32) + 
     +					2.D0*a31*a32*(a13*a31 + a11*a33)
	rotmat(15,col) = 2.D0*a31*a33*(a12*a21 + a11*a22) + 
     +					2.D0*a31*a32*(a13*a21 + a11*a23)

	rotmat(16,col) = 2.D0 * (a22*a31 + a21*a32)*(a23*a31 + a21*a33)
	rotmat(17,col) = (a13*a31+a11*a33)*(a22*a31+a21*a32) +
     +					(a12*a31+a11*a32)*(a23*a31+a21*a33)
	rotmat(18,col) = (a13*a21+a11*a23)*(a22*a31+a21*a32) +
     +					(a12*a21+a11*a22)*(a23*a31+a21*a33)

	rotmat(19,col) = 2.D0 * (a12*a31 + a11*a32)*(a13*a31 + a11*a33)
	rotmat(20,col) = (a13*a21+a11*a23)*(a12*a31+a11*a32) +
     +					(a12*a21+a11*a22)*(a13*a31+a11*a33)
	rotmat(19,col) = 2.D0 * (a12*a21 + a11*a22)*(a13*a21 + a11*a23)

c column 21 ............................................
	col = 21

	rotmat( 1,col) = 4.D0 *(a11**2)*(a12**2)
	rotmat( 2,col) = 4.D0 * a11 * a12 * a21 * a22
	rotmat( 3,col) = 4.D0 * a11 * a12 * a31 * a32
	rotmat( 4,col) = 2.D0 * a11 * a12 * (a22*a31 + a21*a32)
	rotmat( 5,col) = 2.D0 * a11 * a12 * (a12*a31 + a11*a32)
	rotmat( 6,col) = 2.D0 * a11 * a12 * (a12*a21 + a11*a22)

	rotmat( 7,col) = 4.D0 *(a21**2)*(a22**2)
	rotmat( 8,col) = 4.D0 * a21 * a22 * a31 * a32
	rotmat( 9,col) = 2.D0 * a21 * a22 * (a22*a31 + a21*a32)
	rotmat(10,col) = 2.D0 * a21 * a22 * (a12*a31 + a11*a32)
	rotmat(11,col) = 2.D0 * a21 * a22 * (a12*a21 + a11*a22)

	rotmat(12,col) = 4.D0 *(a31**2)*(a32**2)
	rotmat(13,col) = 2.D0 * a31 * a32 * (a22*a31 + a21*a32)
	rotmat(14,col) = 2.D0 * a31 * a32 * (a12*a31 + a11*a32)
	rotmat(15,col) = 2.D0 * a31 * a32 * (a12*a21 + a11*a22)

	rotmat(16,col) =  (a22*a31 + a21*a32)**2
	rotmat(17,col) =  (a12*a31 + a11*a32)*(a22*a31 + a21*a32)
	rotmat(18,col) =  (a12*a21 + a11*a22)*(a22*a31 + a21*a32)

	rotmat(19,col) =  (a12*a31 + a11*a32)**2
	rotmat(20,col) =  (a12*a21 + a11*a22)*(a12*a31 + a11*a32)
	rotmat(21,col) =  (a12*a21 + a11*a22)**2


c Uncomment for diagnotic printing - does not affect definition of 
c							rotation matrix.
c	write(6,899)
c	do row = 1,21
c		write(6,900)row,(rotmat(row,col),col=1,7)
c	enddo
c	do row = 1,21
c		write(6,910)row,(rotmat(row,col),col=8,14)
c	enddo
c	do row = 1,21
c		write(6,920)row,(rotmat(row,col),col=15,21)
c	enddo
c
c899	format(' ')
c900	format('Rotmat  1- 7>',i3,7f8.5)
c910	format('Rotmat  8-14>',i3,7f8.5)
c920	format('Rotmat 15-21>',i3,7f8.5)

	return
	end
